# Supplementary material for: Calling genotypes from public RNA-sequencing data enables identification of genetic variants that affect gene-expression levels
Source: PubMed Central journal article supplement (PMC4423486; doi:10.1186/s13073-015-0152-4), 2015-03-27

# GC content

**Comp 1**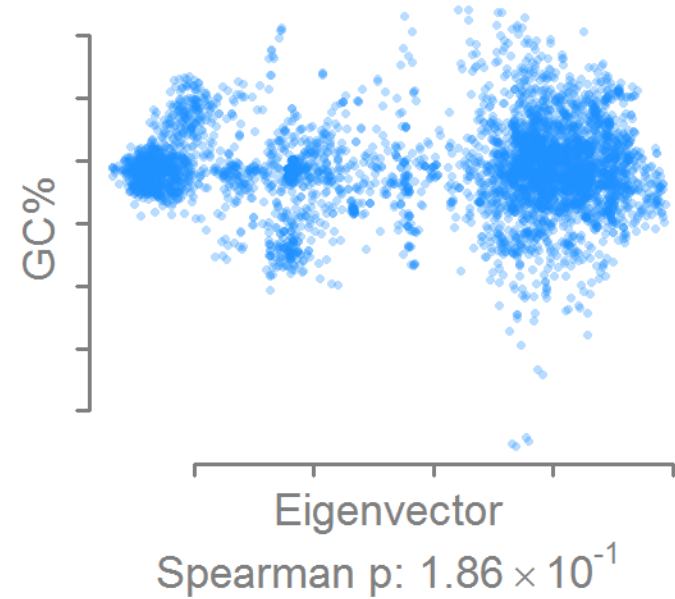**Comp 2**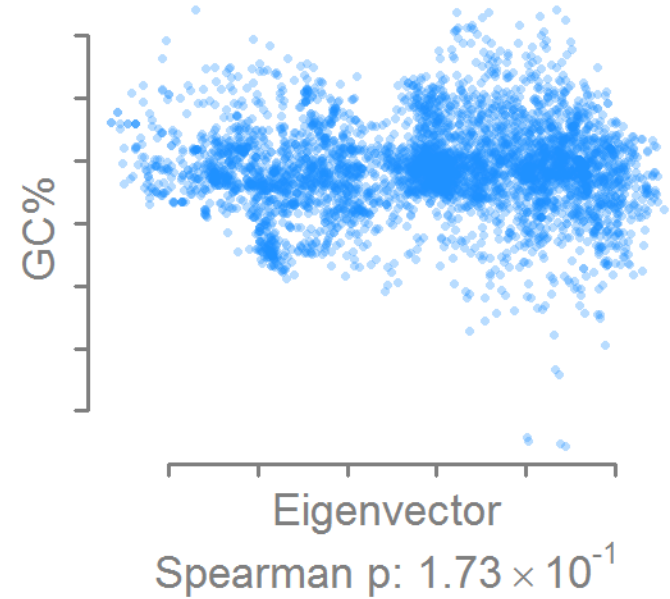**Comp 3**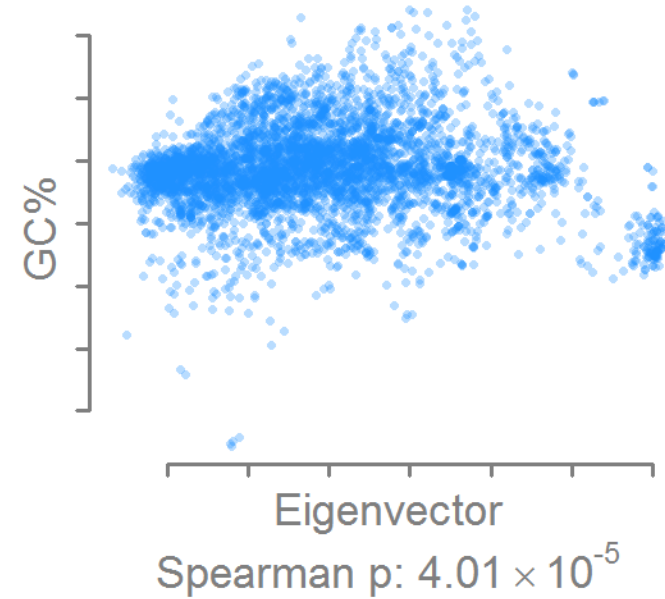**Comp 4**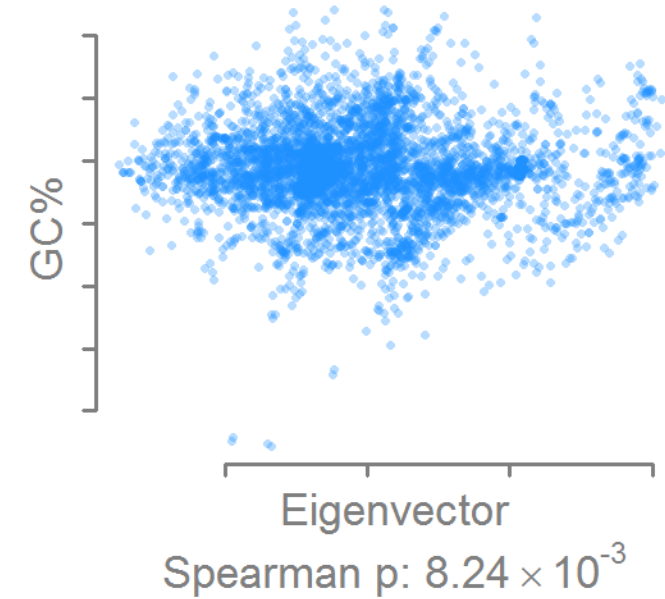**Comp 5**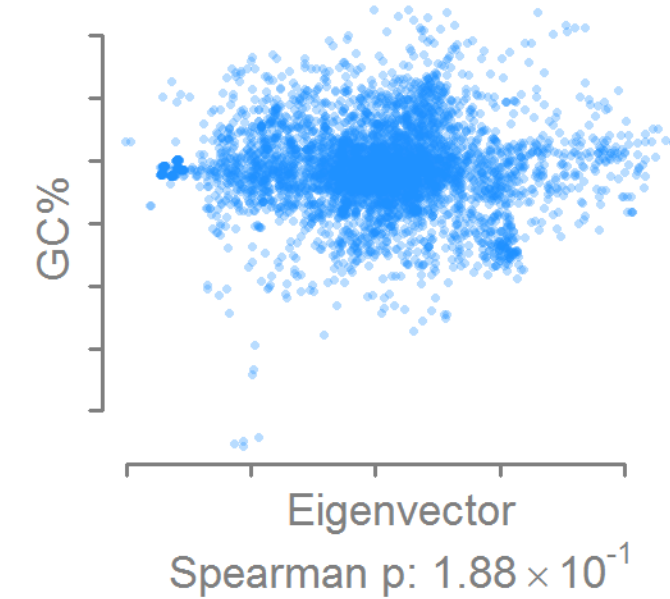**Comp 6**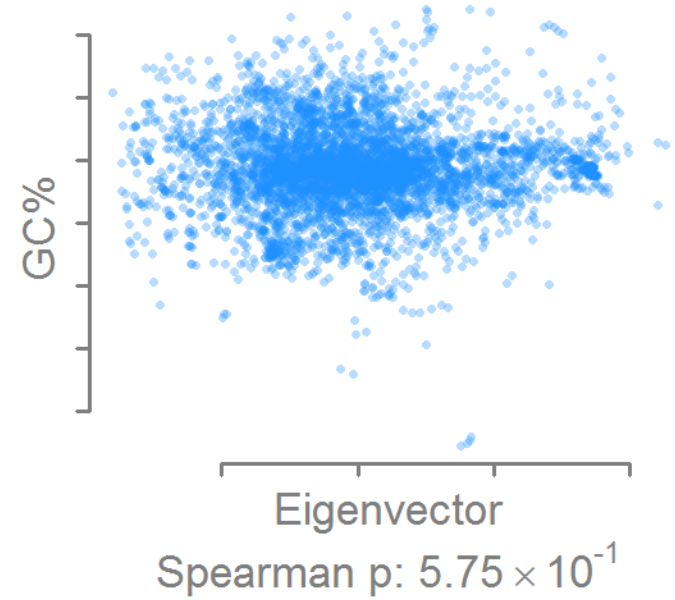**Comp 7**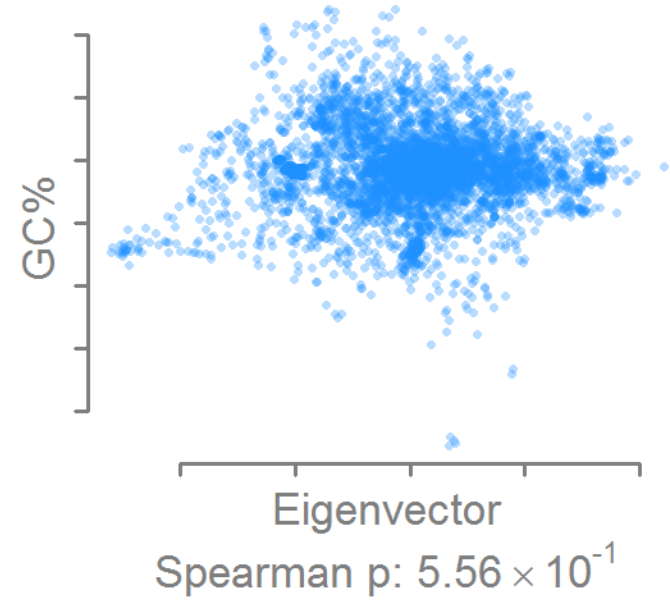**Comp 8**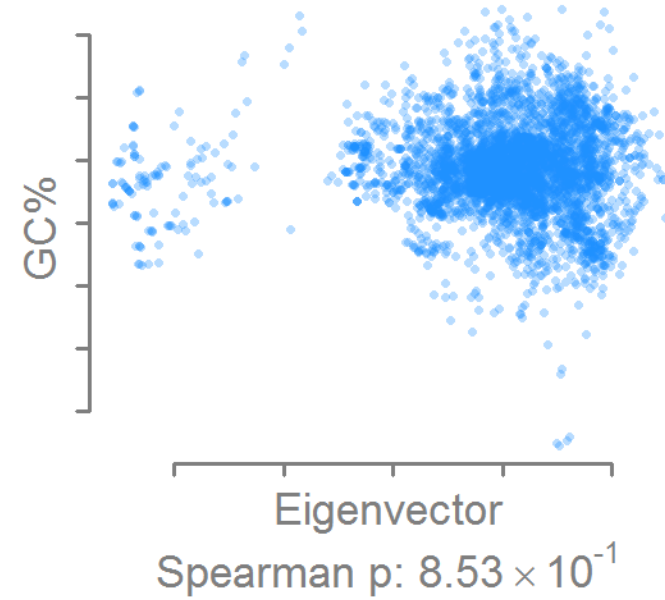**Comp 9**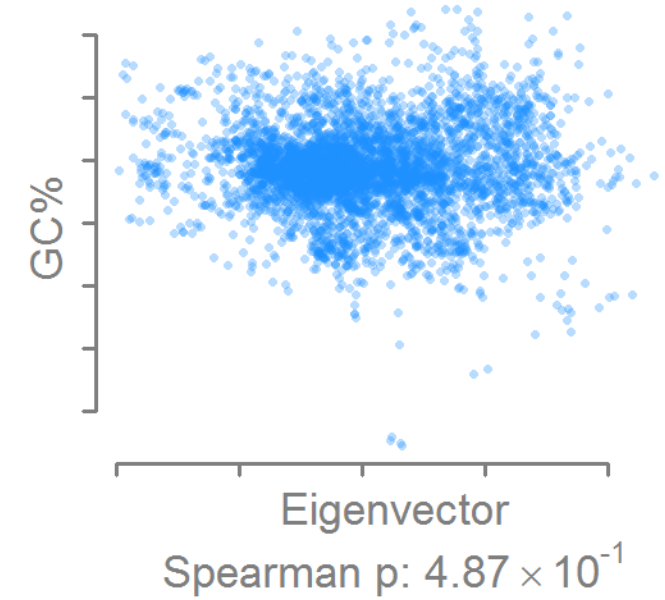**Comp 10**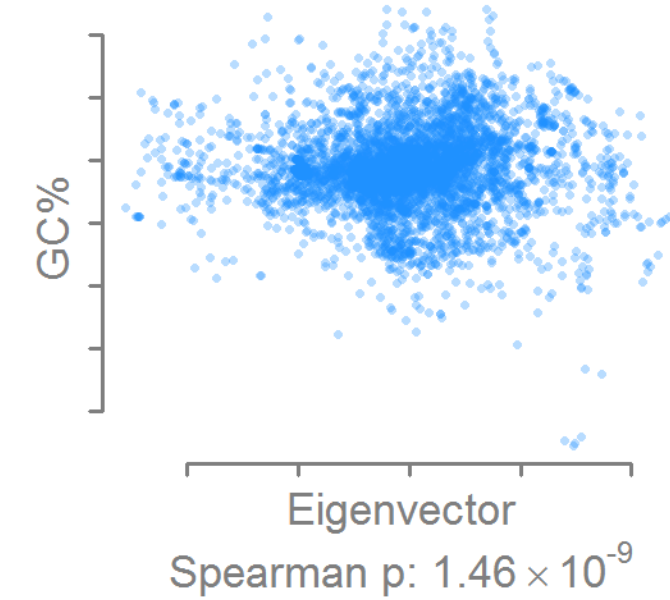**Comp 11**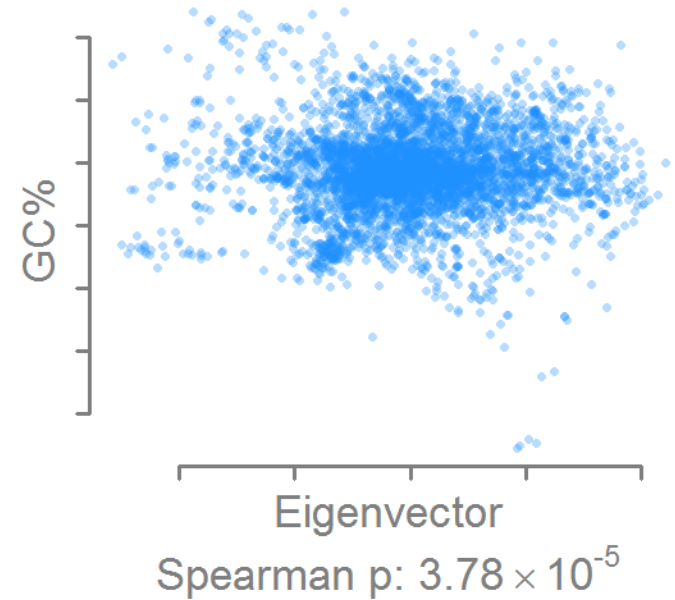**Comp 12**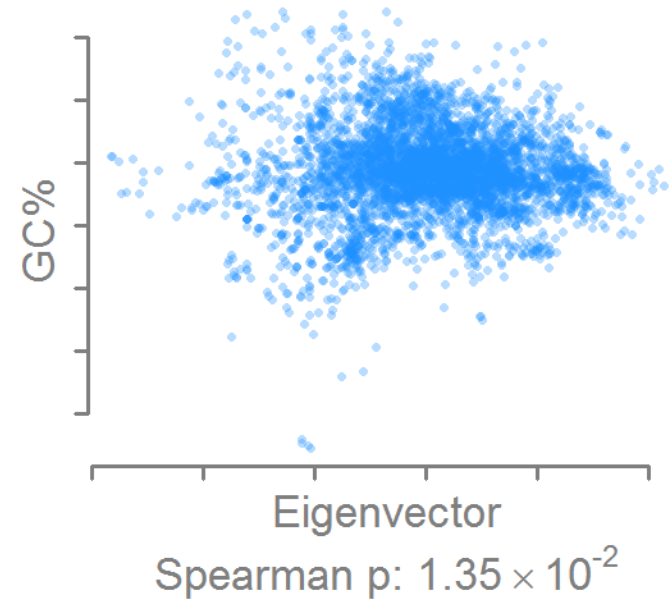**Comp 13**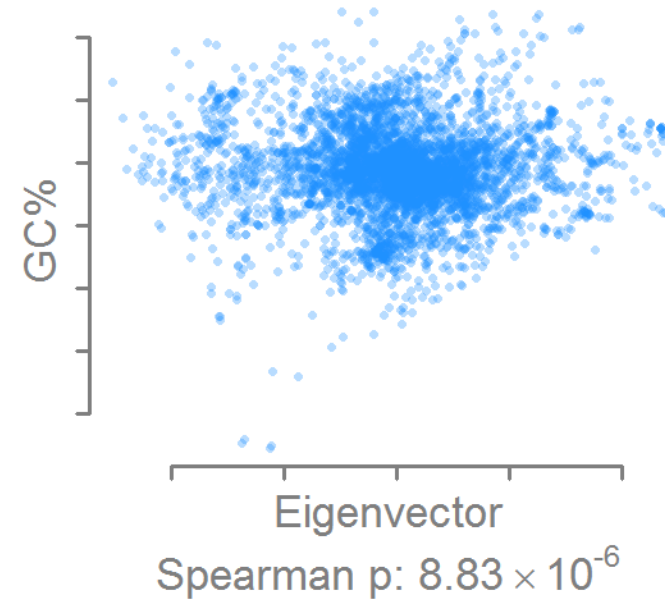**Comp 14**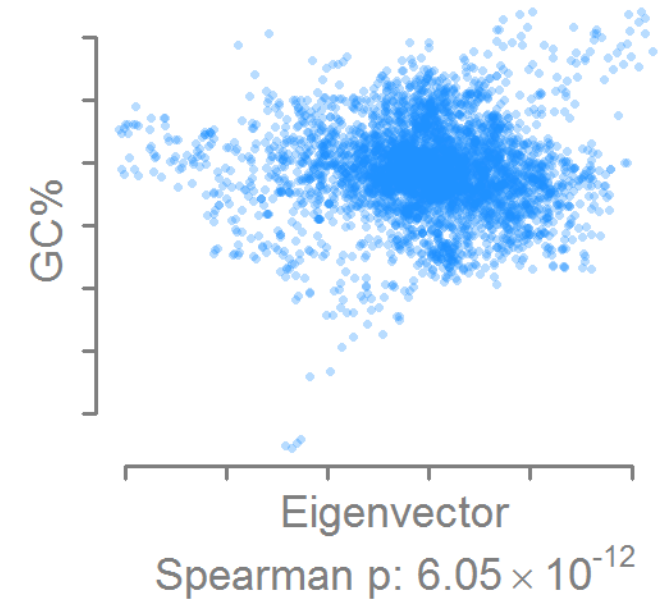**Comp 15**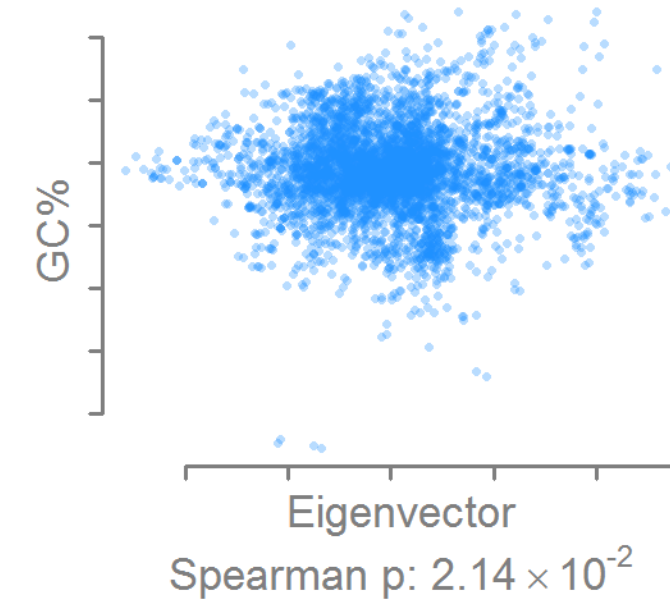**Comp 16**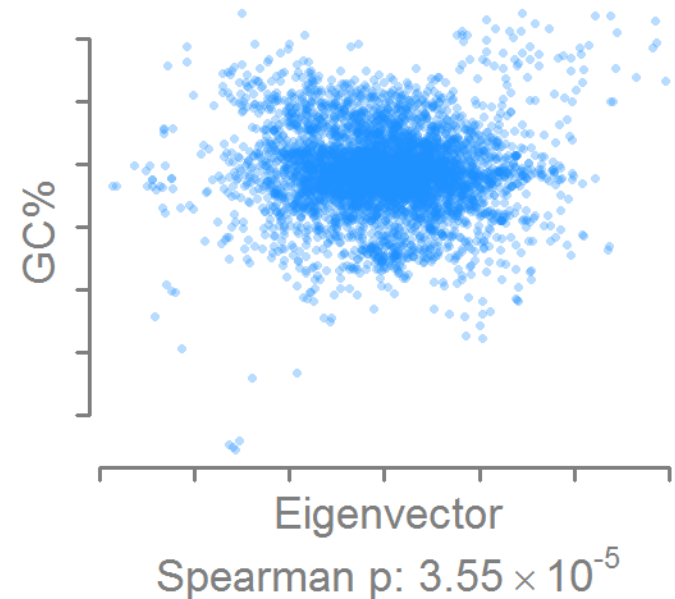**Comp 17**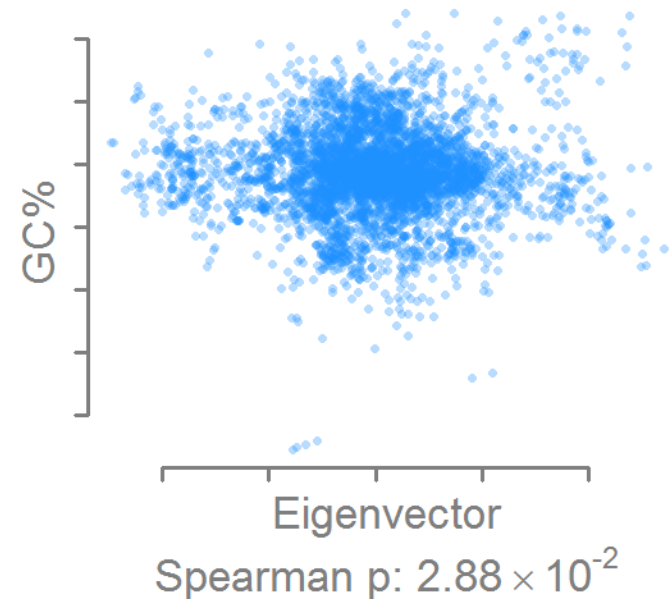**Comp 18**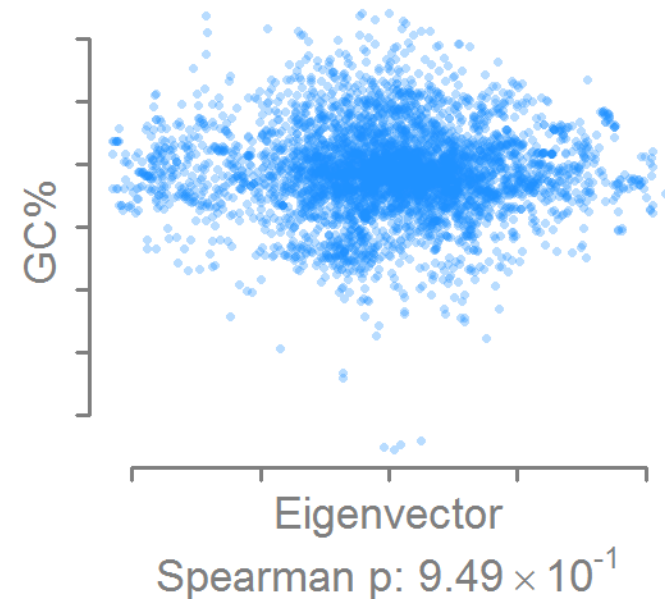**Comp 19**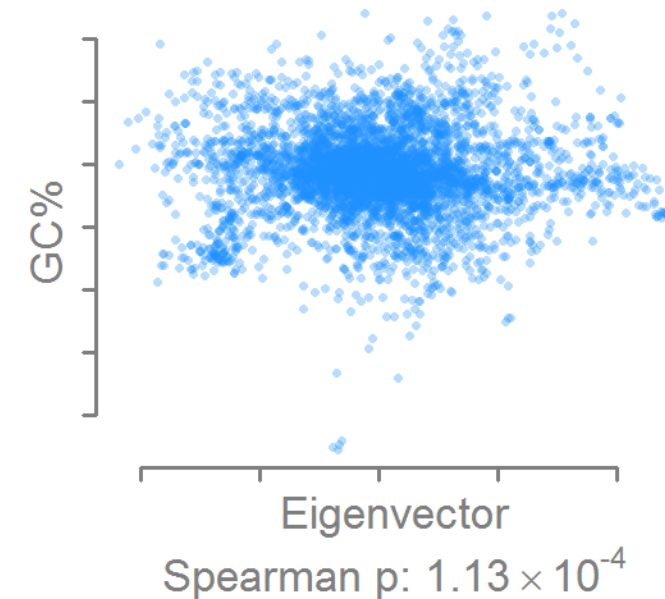**Comp 20**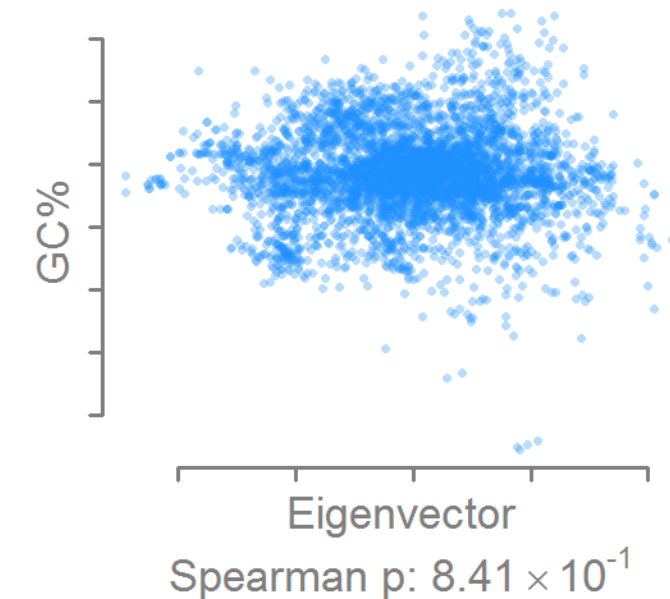**Comp 21**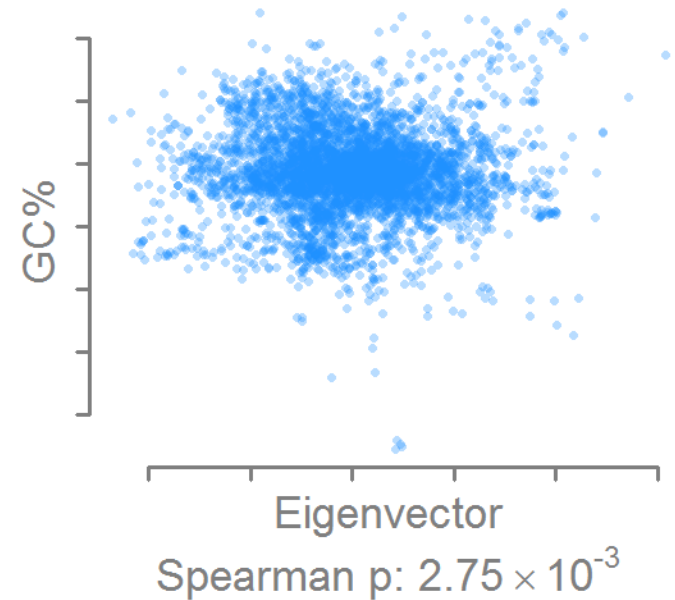**Comp 22**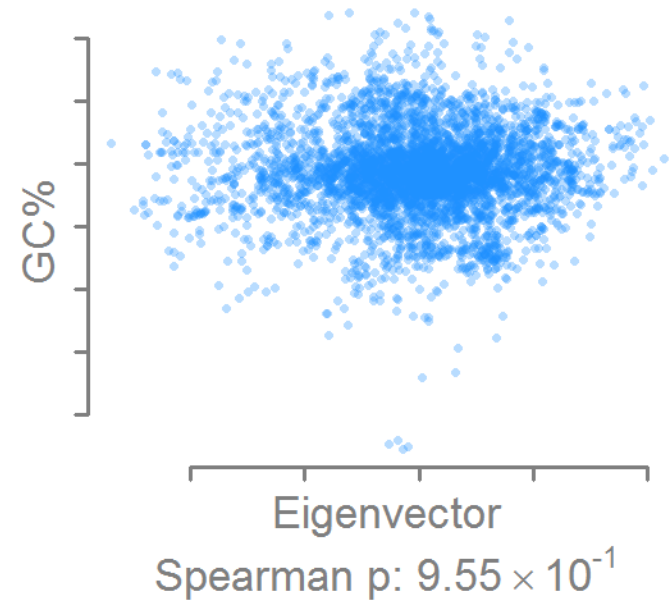**Comp 23**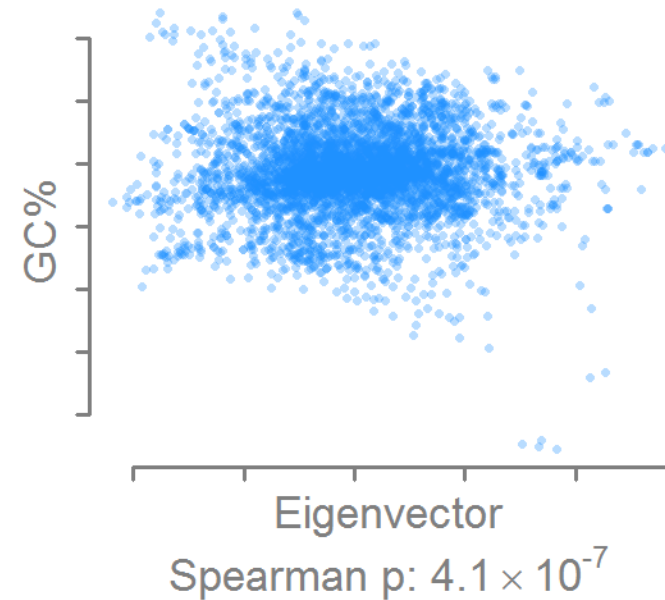**Comp 24**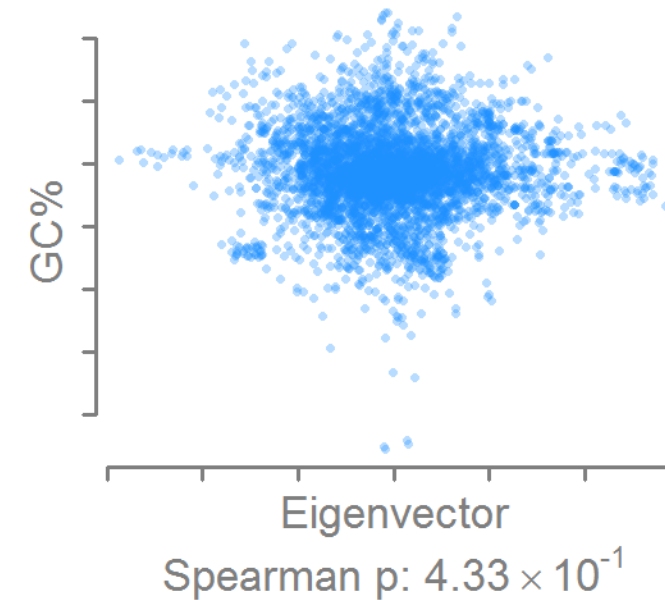**Comp 25**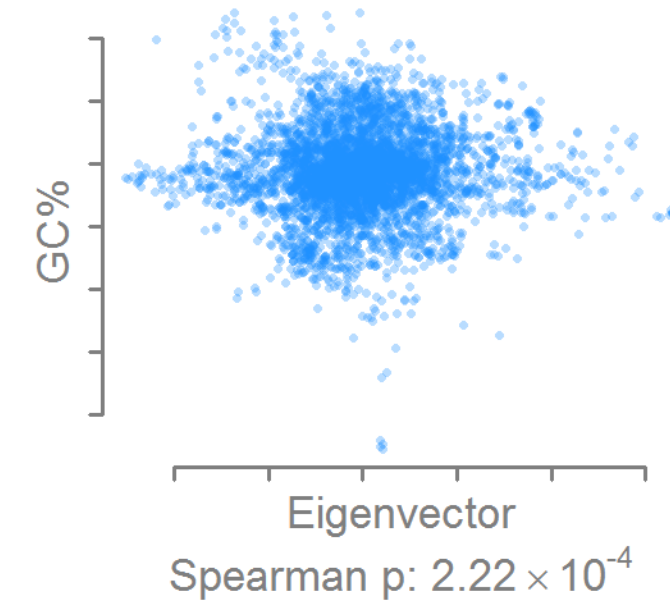

# Total reads

**Comp 1**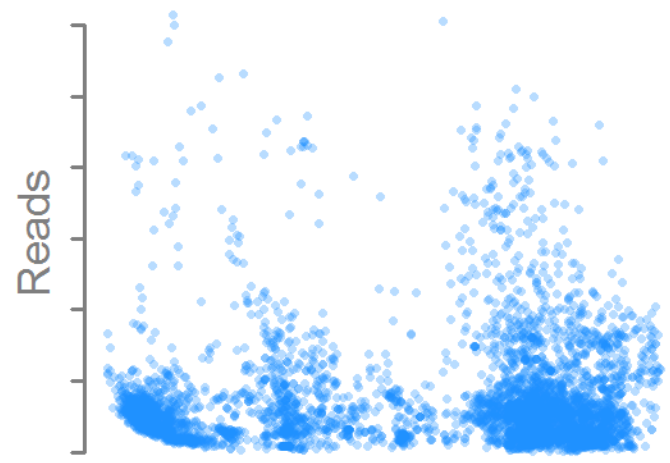

Eigenvector  
Spearman p:  $2.31 \times 10^{-1}$

**Comp 2**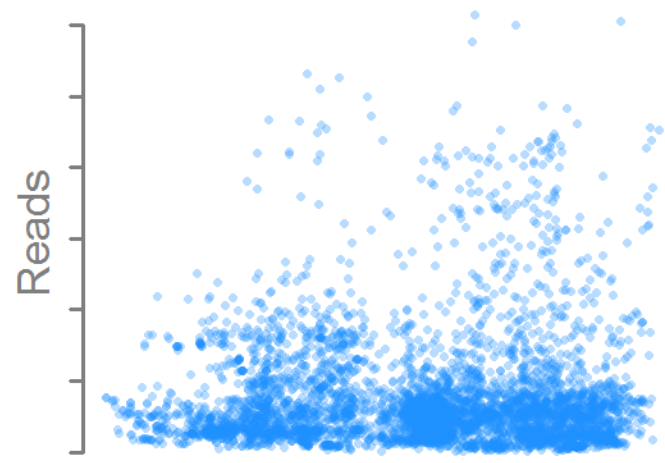

Eigenvector  
Spearman p:  $3.07 \times 10^{-7}$

**Comp 3**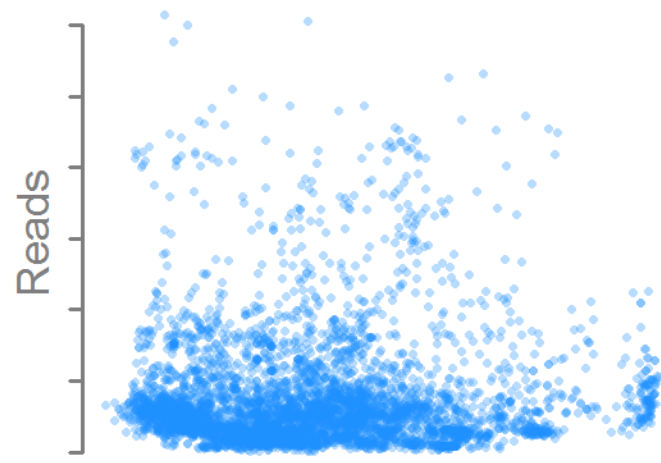

Eigenvector  
Spearman p:  $2.66 \times 10^{-7}$

**Comp 4**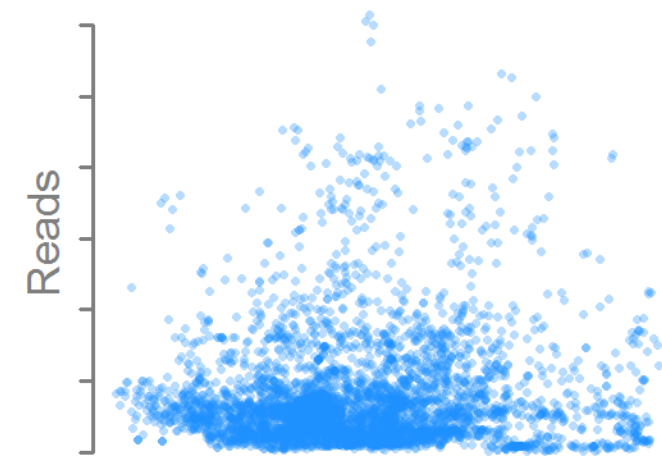

Eigenvector  
Spearman p:  $1.5 \times 10^{-4}$

**Comp 5**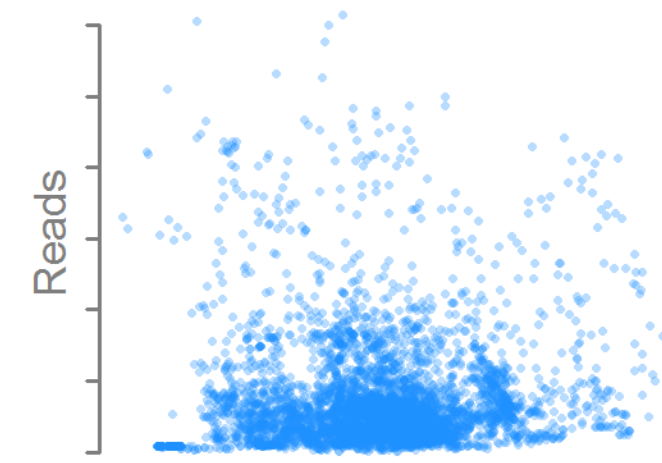

Eigenvector  
Spearman p:  $1.96 \times 10^{-12}$

**Comp 6**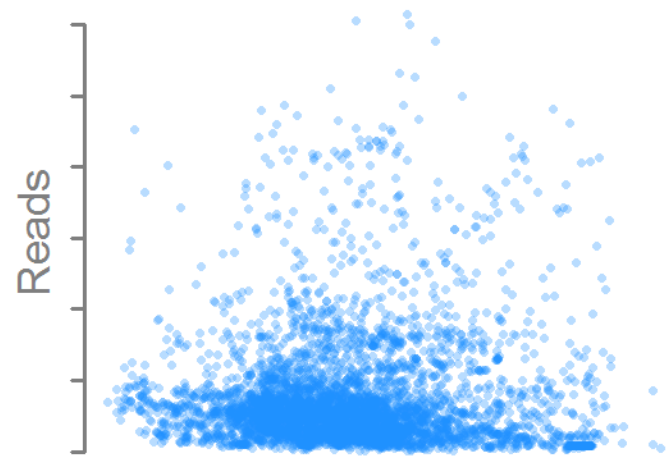

Eigenvector  
Spearman p:  $1.78 \times 10^{-25}$

**Comp 7**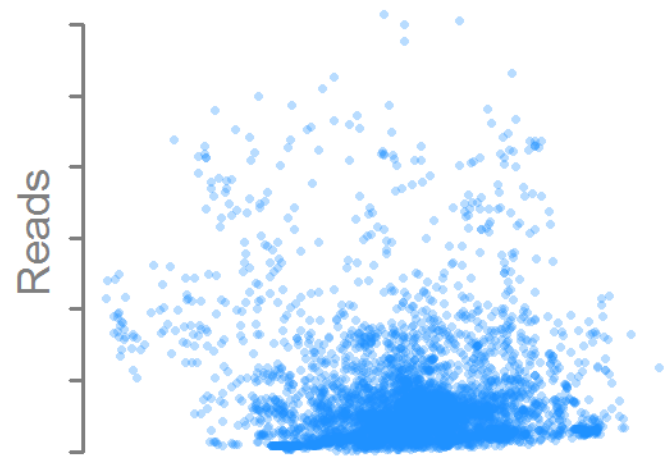

Eigenvector  
Spearman p:  $6.35 \times 10^{-13}$

**Comp 8**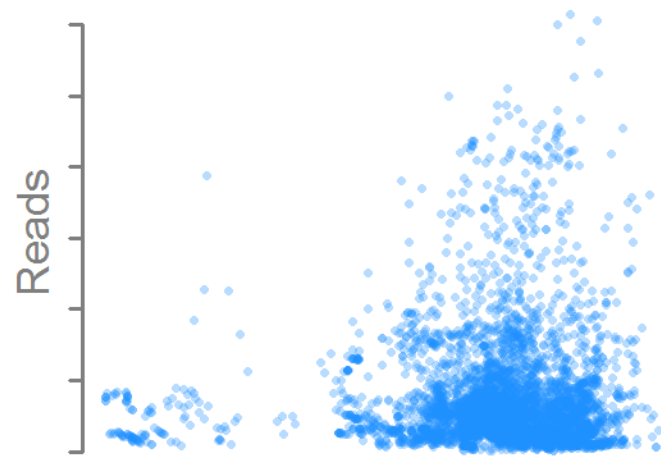

Eigenvector  
Spearman p:  $5.78 \times 10^{-1}$

**Comp 9**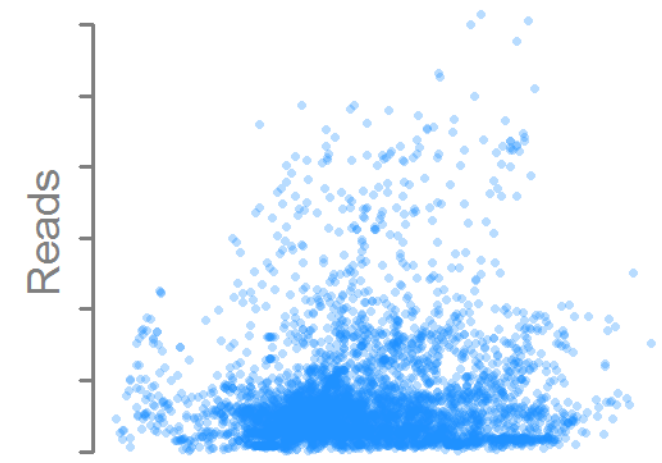

Eigenvector  
Spearman p:  $3.29 \times 10^{-11}$

**Comp 10**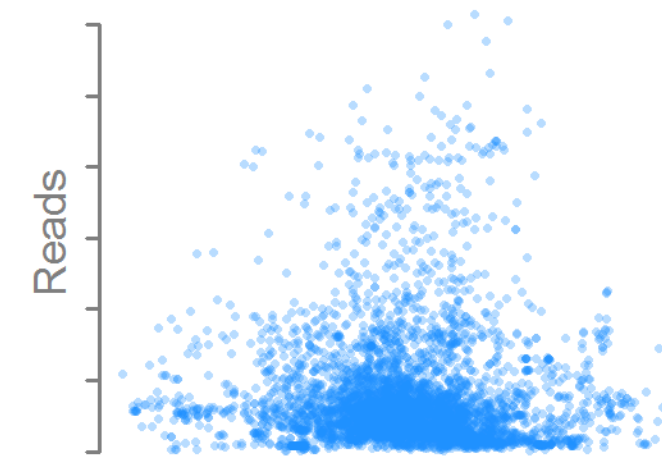

Eigenvector  
Spearman p:  $3.87 \times 10^{-8}$

**Comp 11**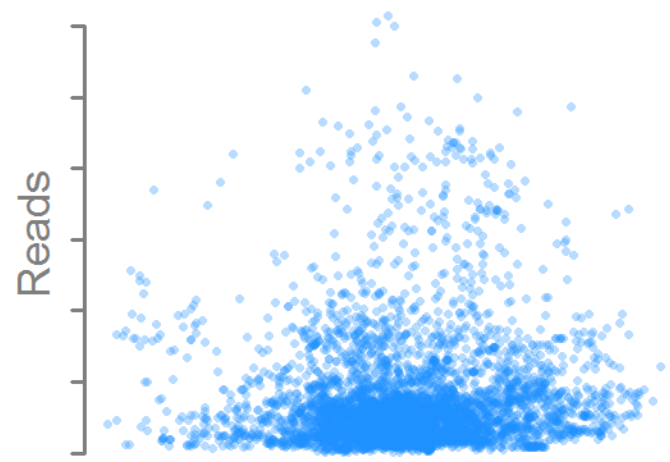

Eigenvector  
Spearman p:  $1.91 \times 10^{-6}$

**Comp 12**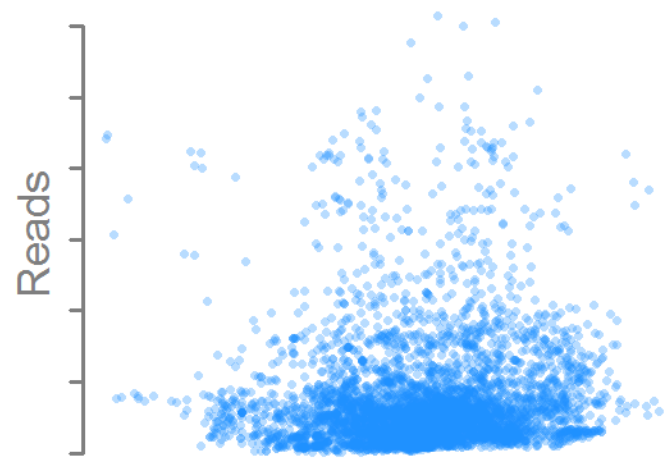

Eigenvector  
Spearman p:  $4.77 \times 10^{-20}$

**Comp 13**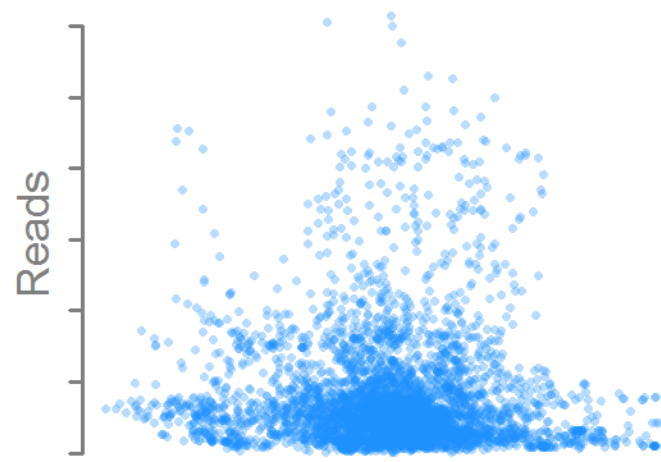

Eigenvector  
Spearman p:  $4.55 \times 10^{-4}$

**Comp 14**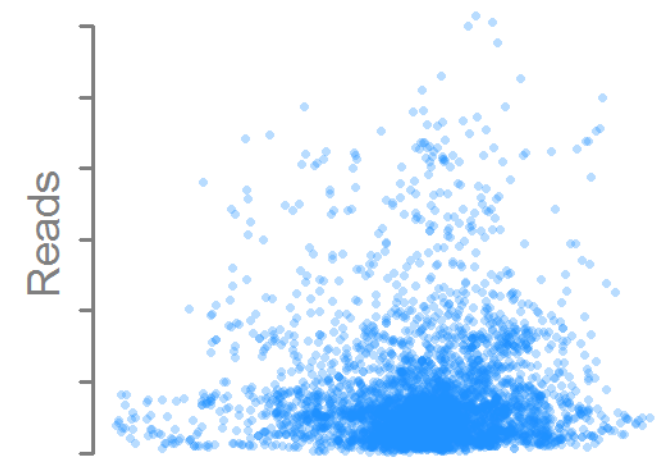

Eigenvector  
Spearman p:  $5.74 \times 10^{-5}$

**Comp 15**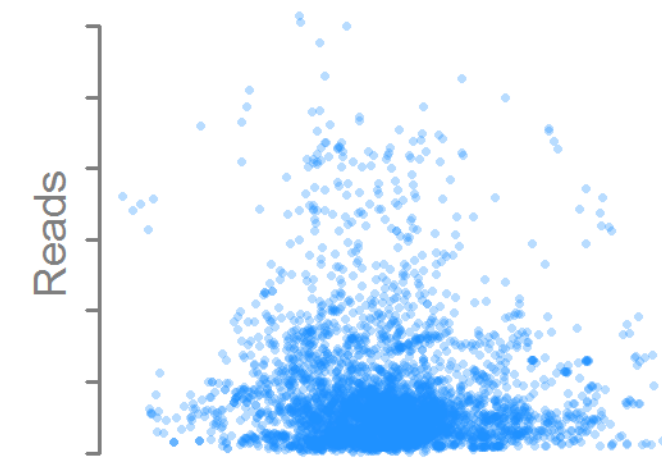

Eigenvector  
Spearman p:  $8.89 \times 10^{-2}$

**Comp 16**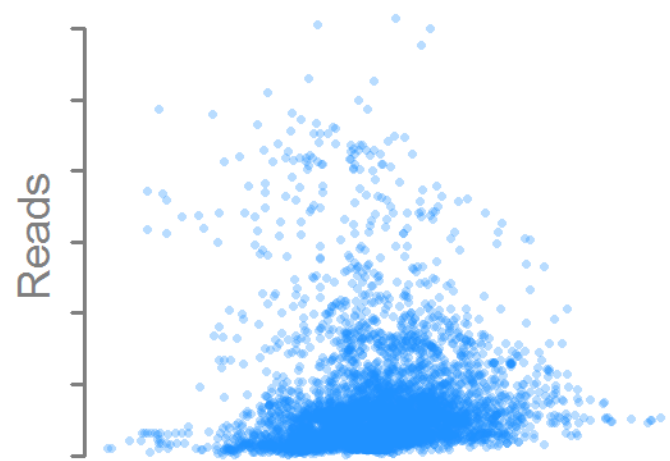

Eigenvector  
Spearman p:  $3.2 \times 10^{-68}$

**Comp 17**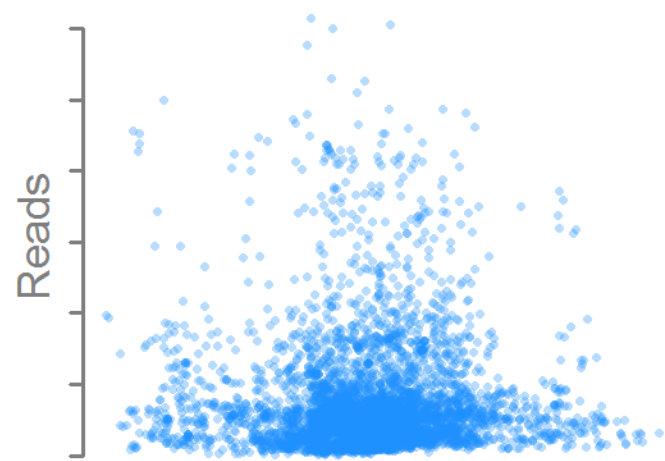

Eigenvector  
Spearman p:  $8.6 \times 10^{-6}$

**Comp 18**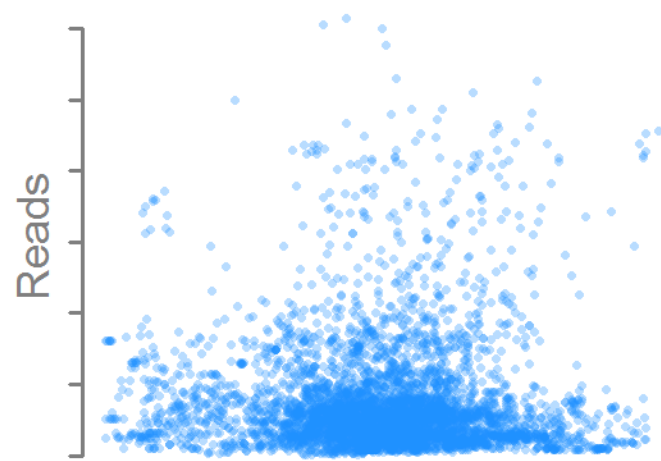

Eigenvector  
Spearman p:  $4.27 \times 10^{-5}$

**Comp 19**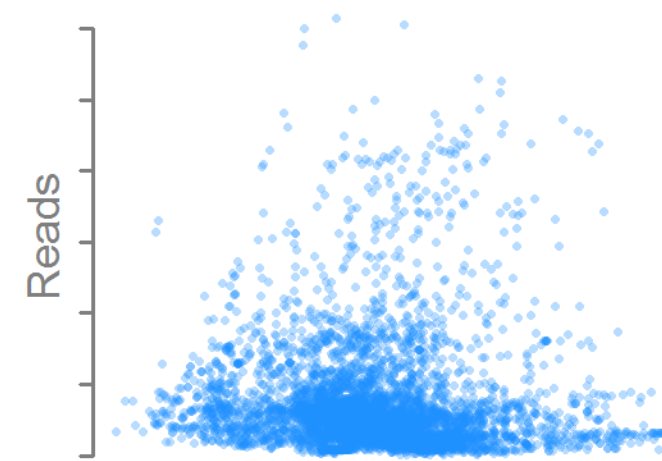

Eigenvector  
Spearman p:  $9.89 \times 10^{-33}$

**Comp 20**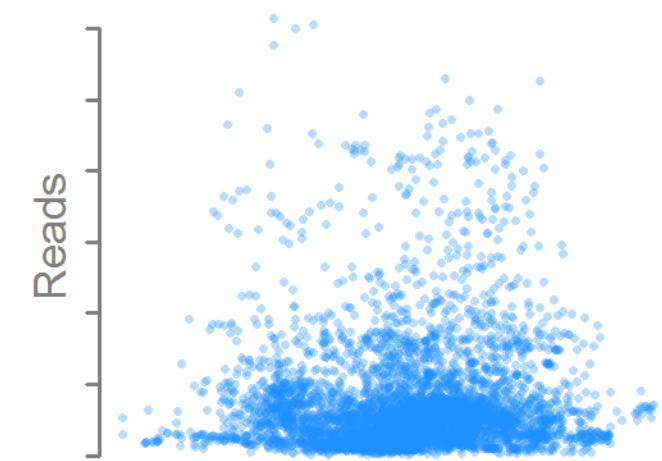

Eigenvector  
Spearman p:  $1.88 \times 10^{-12}$

**Comp 21**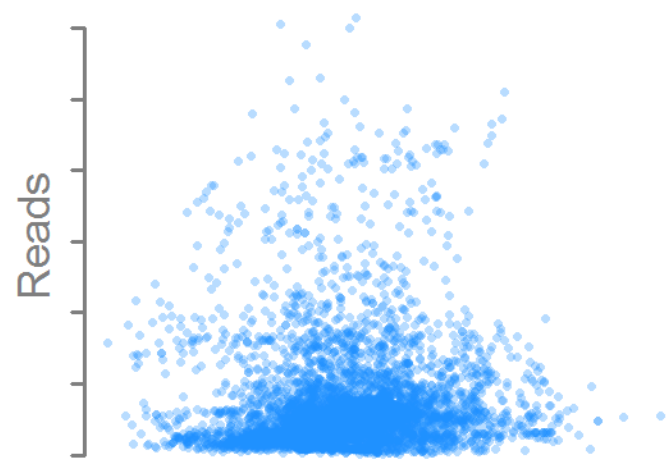

Eigenvector  
Spearman p:  $3.24 \times 10^{-24}$

**Comp 22**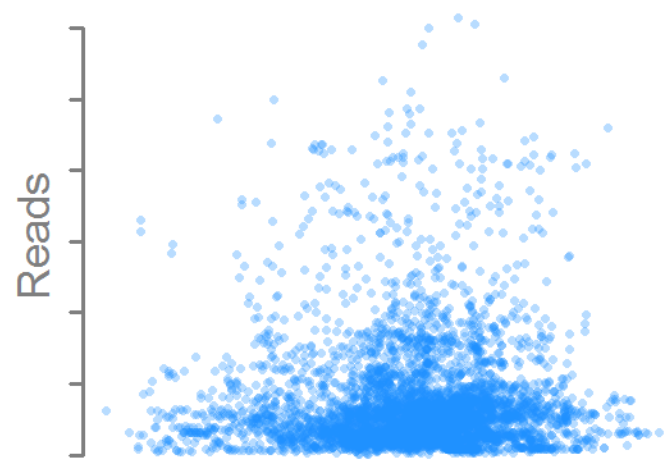

Eigenvector  
Spearman p:  $2.35 \times 10^{-2}$

**Comp 23**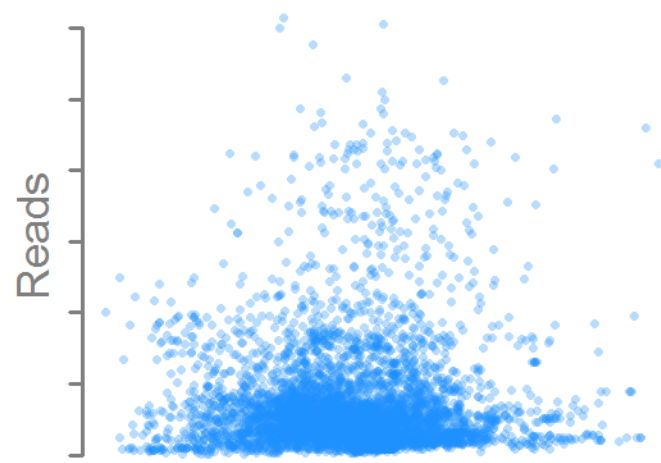

Eigenvector  
Spearman p:  $5.95 \times 10^{-5}$

**Comp 24**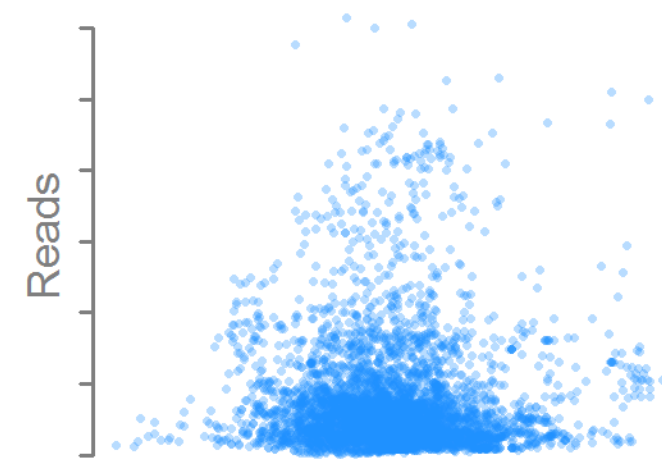

Eigenvector  
Spearman p:  $1.53 \times 10^{-7}$

**Comp 25**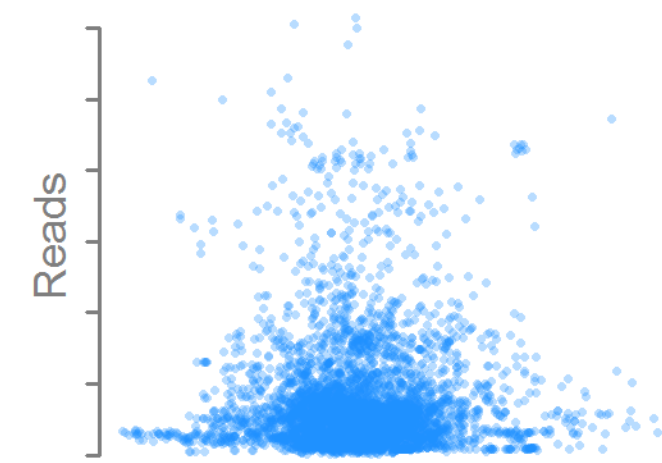

Eigenvector  
Spearman p:  $3.39 \times 10^{-4}$



# Single (S) vs paired (P) end

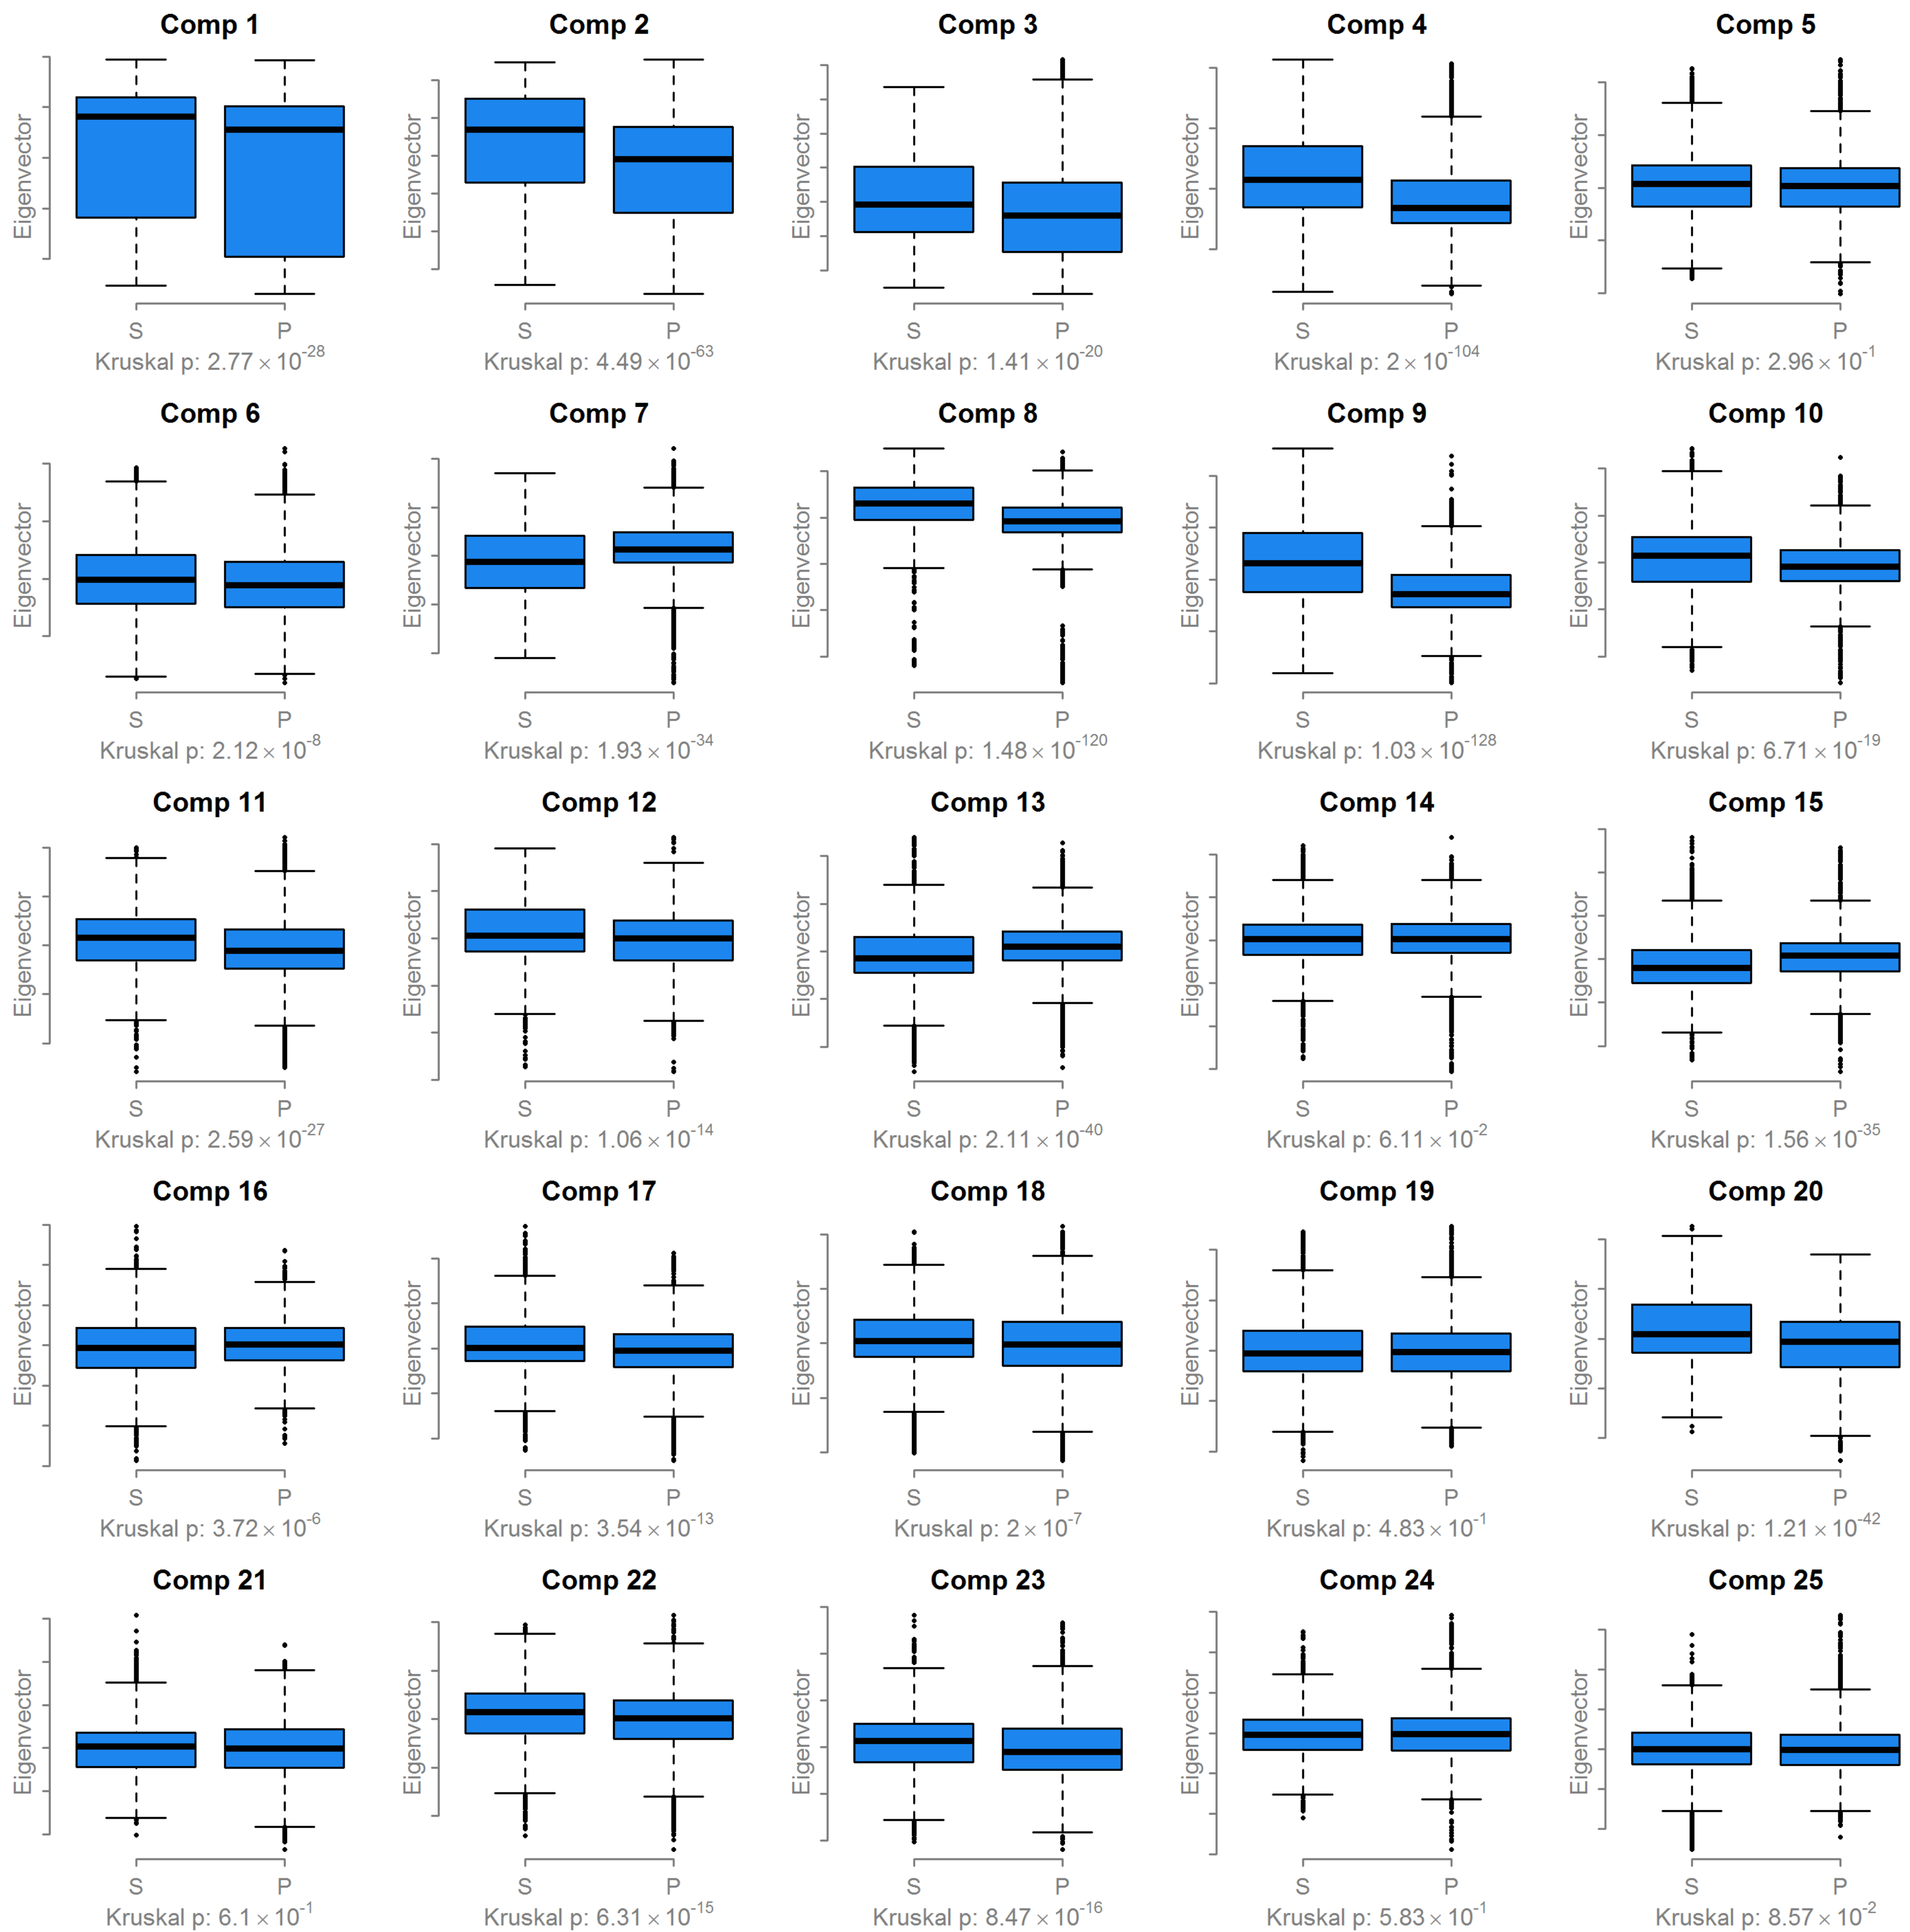

# Platform

1: ABI\_SOLID

2: HELICOS

3: ILLUMINA

4: ION\_TORRENT

5: LS454

### Comp 1

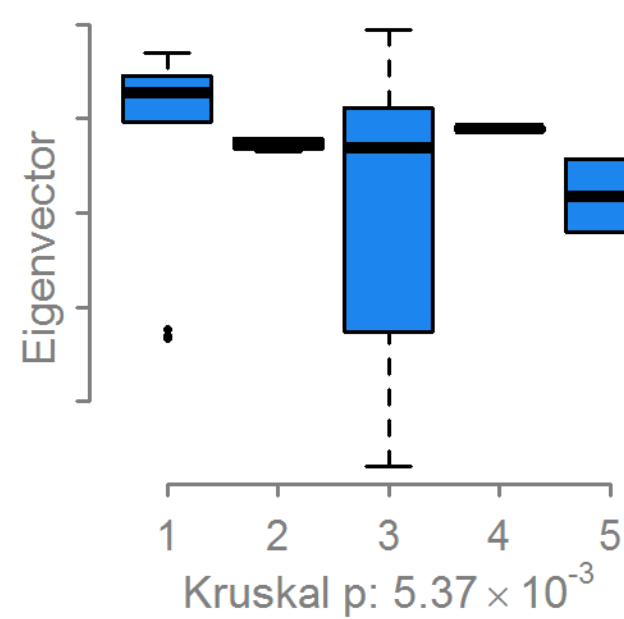

### Comp 2

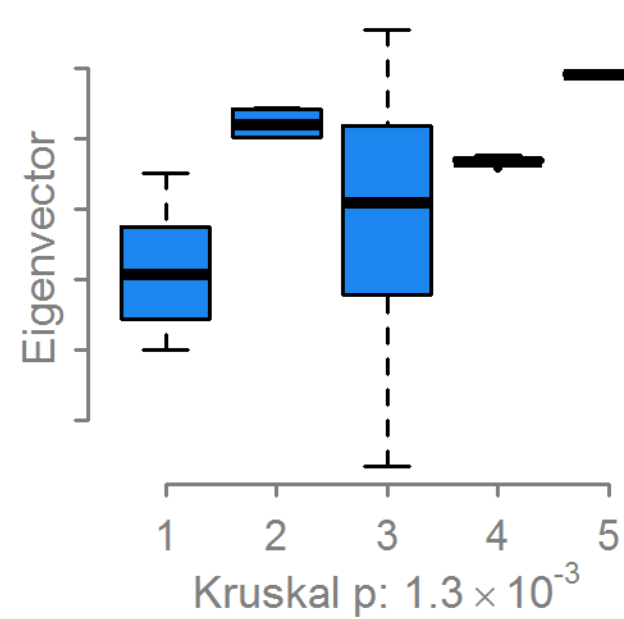

### Comp 3

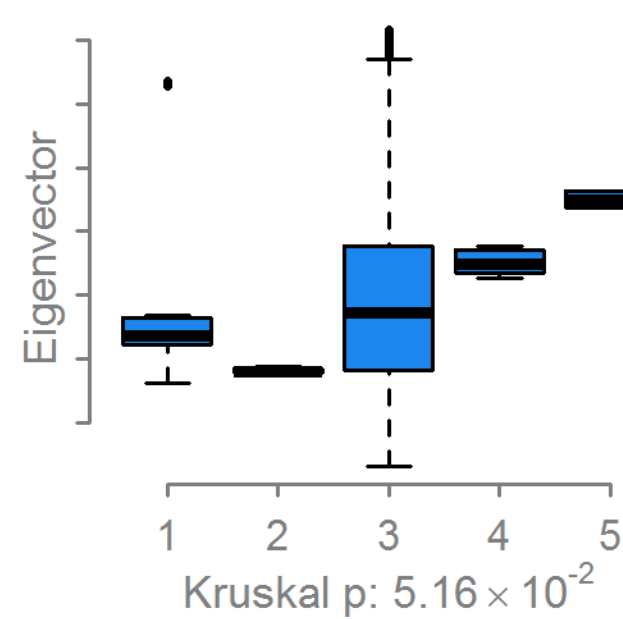

### Comp 4

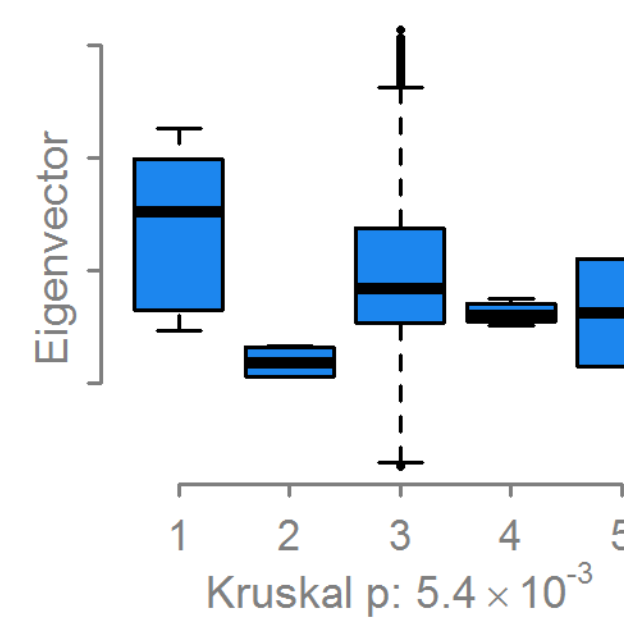

### Comp 5

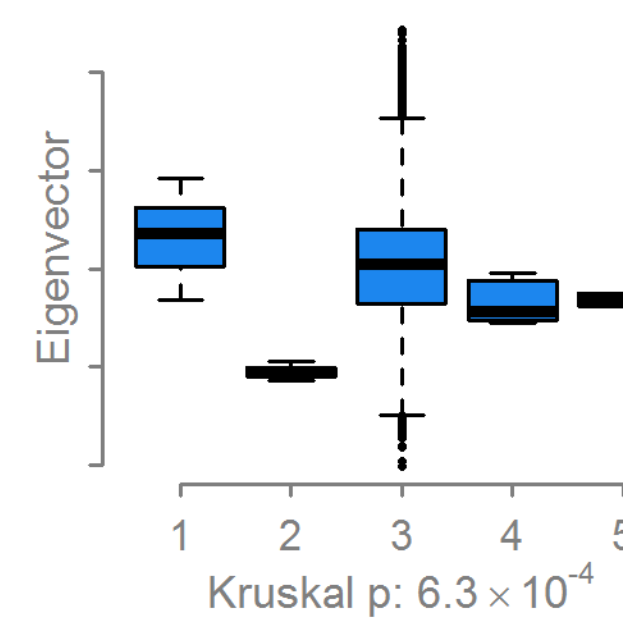

### Comp 6

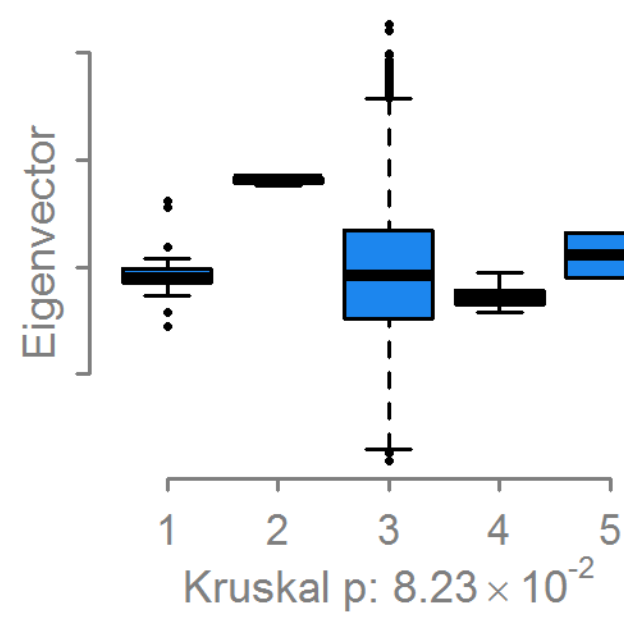

### Comp 7

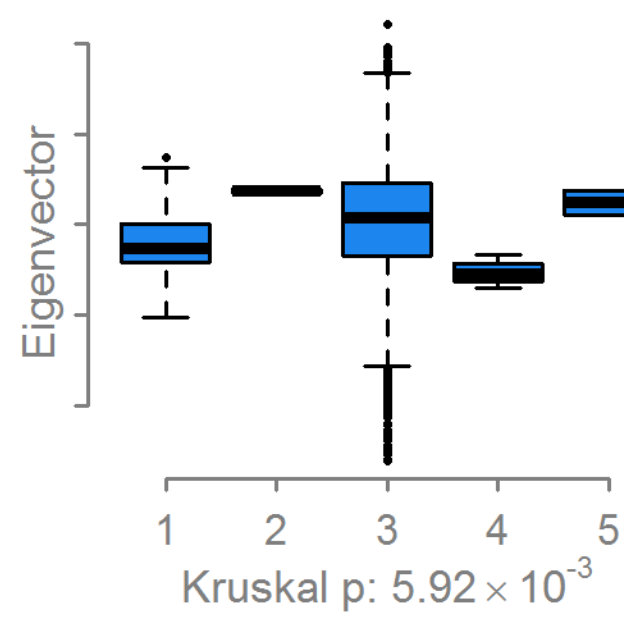

### Comp 8

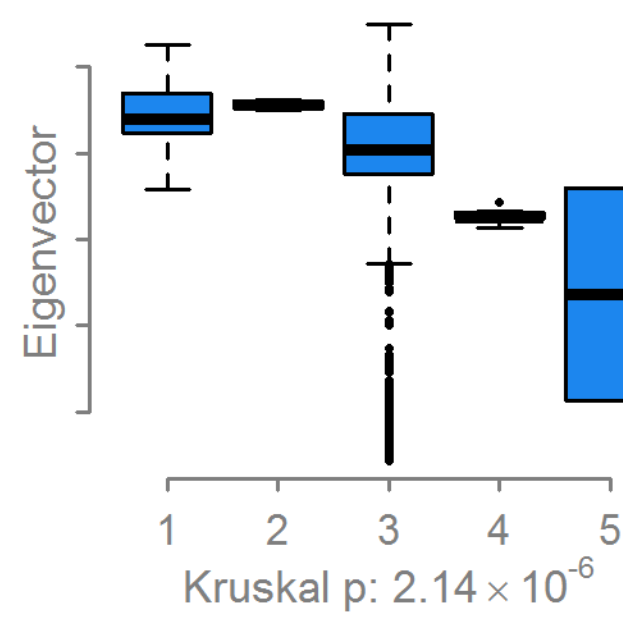

### Comp 9

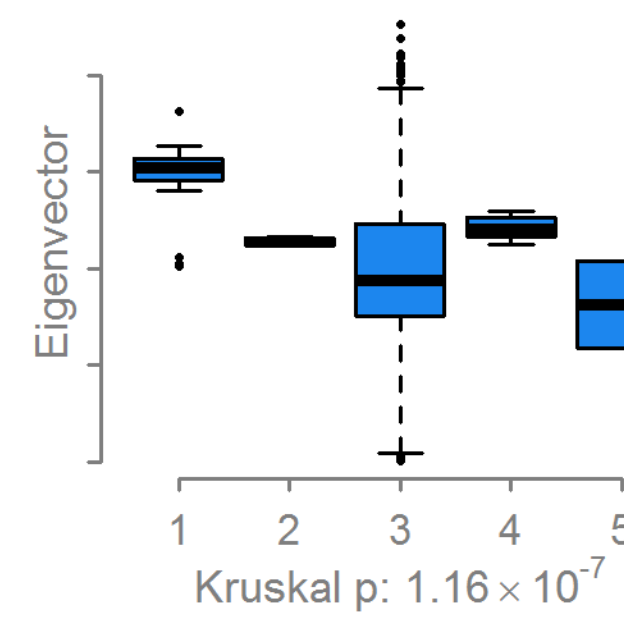

### Comp 10

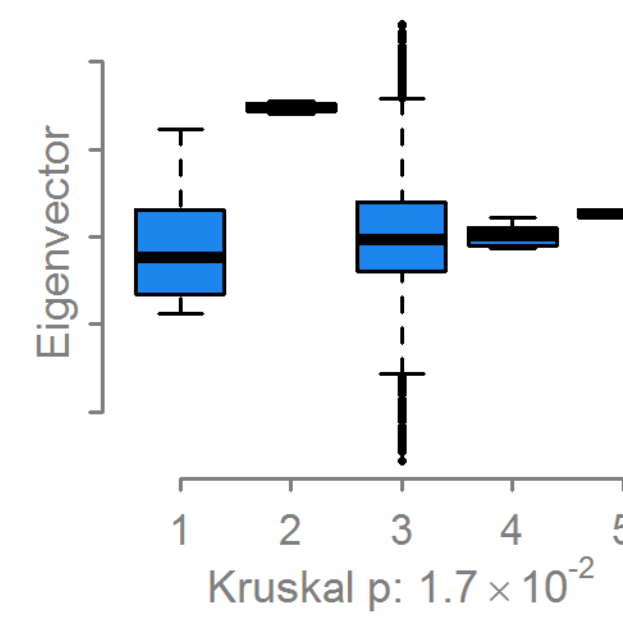

### Comp 11

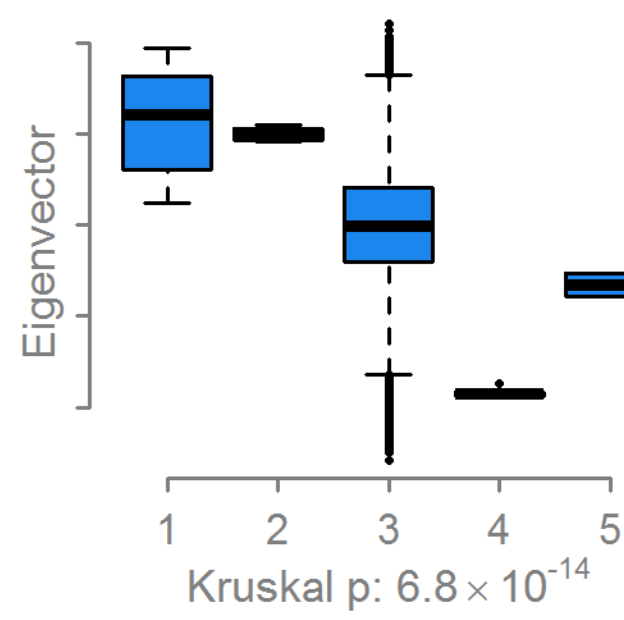

### Comp 12

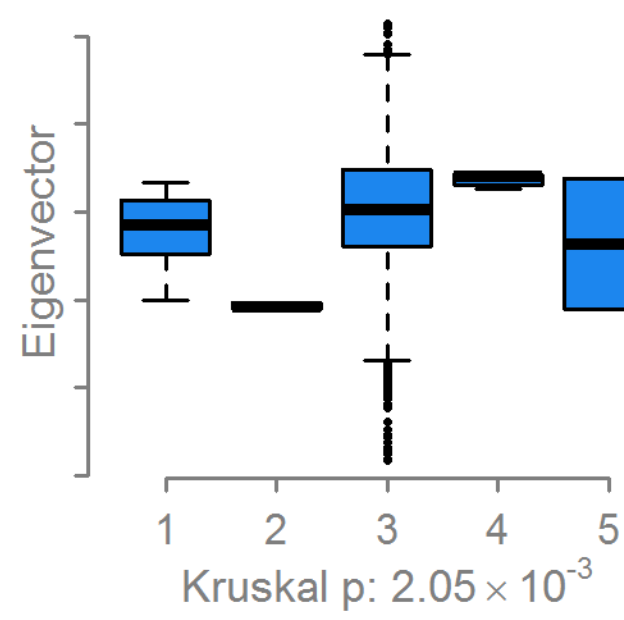

### Comp 13

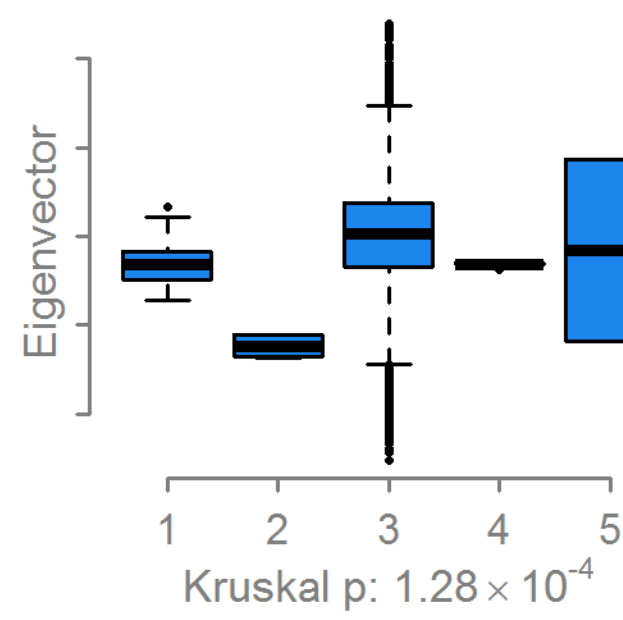

### Comp 14

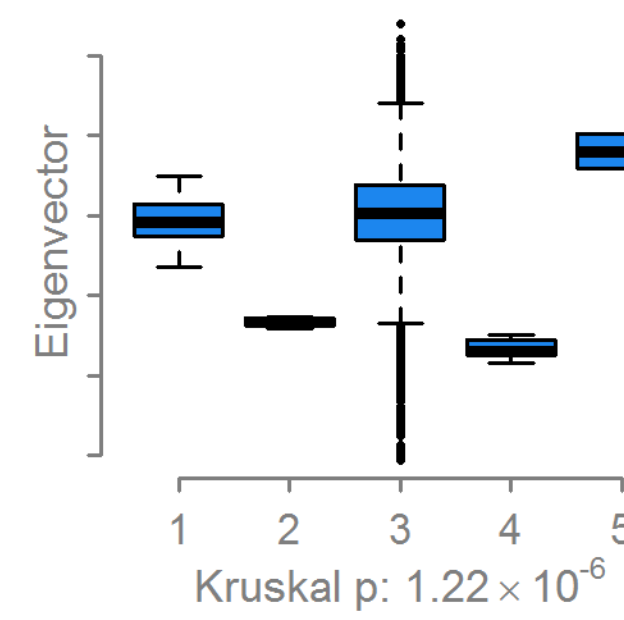

### Comp 15

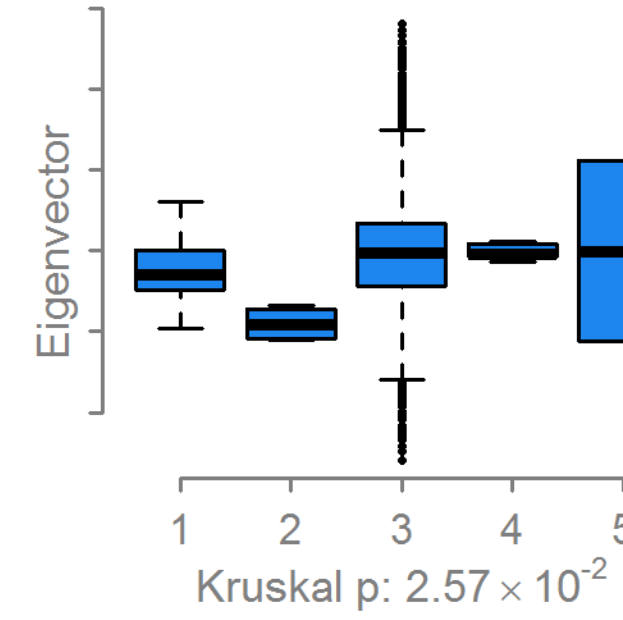

### Comp 16

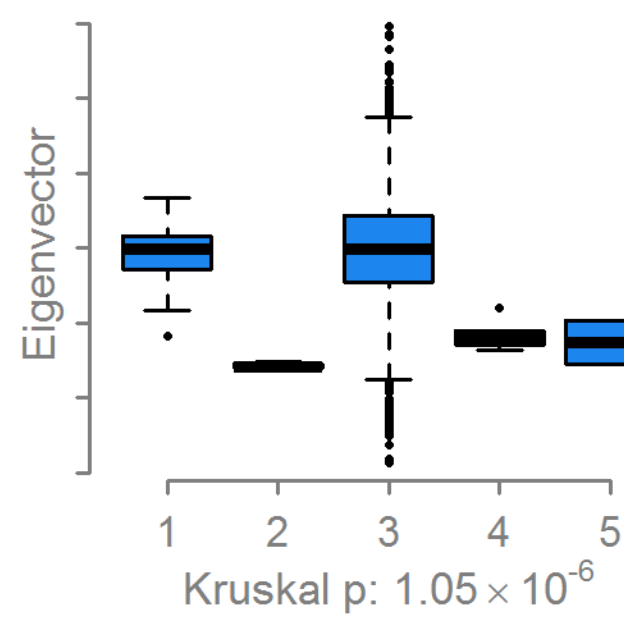

### Comp 17

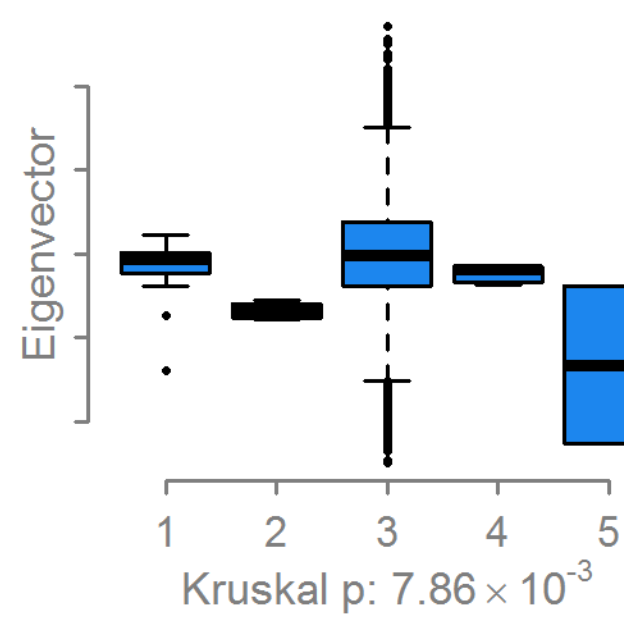

### Comp 18

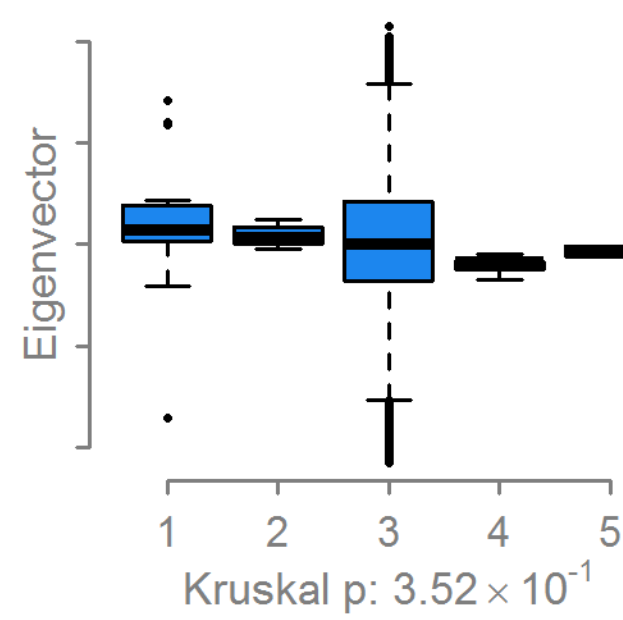

### Comp 19

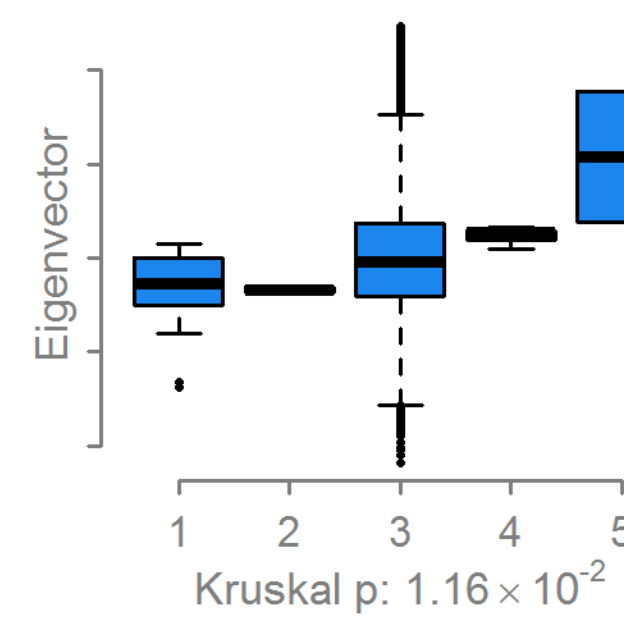

### Comp 20

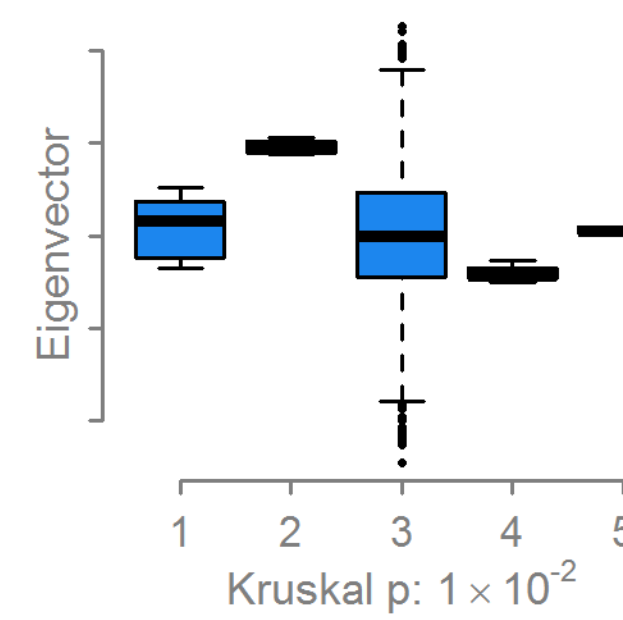

### Comp 21

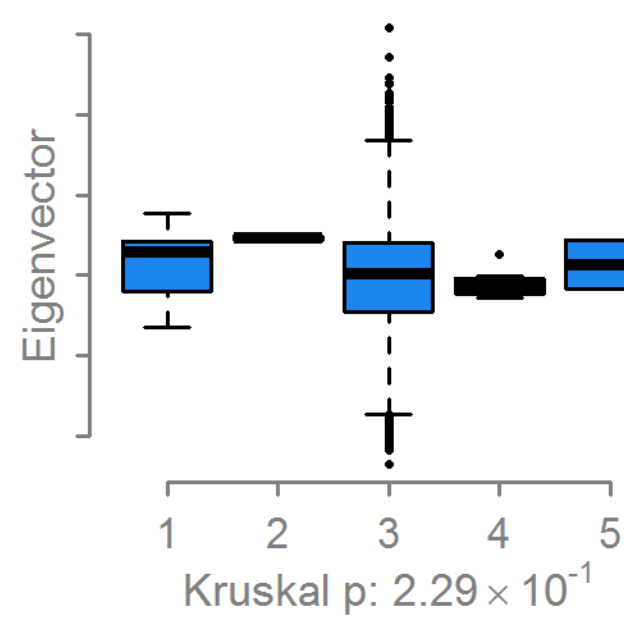

### Comp 22

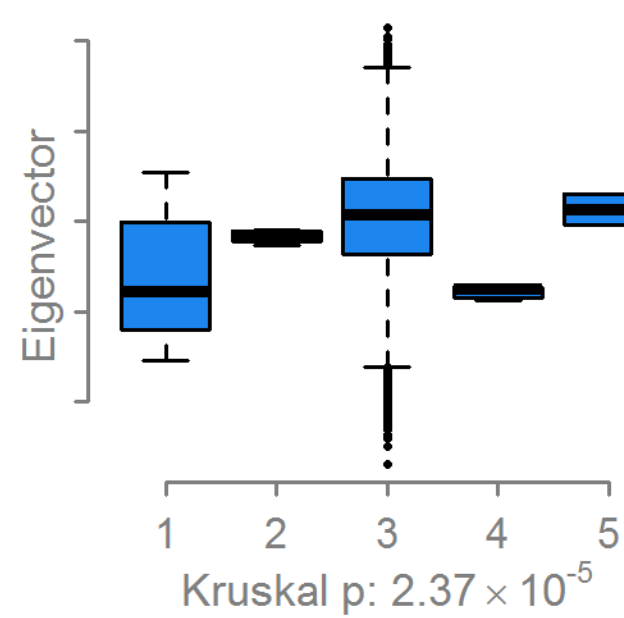

### Comp 23

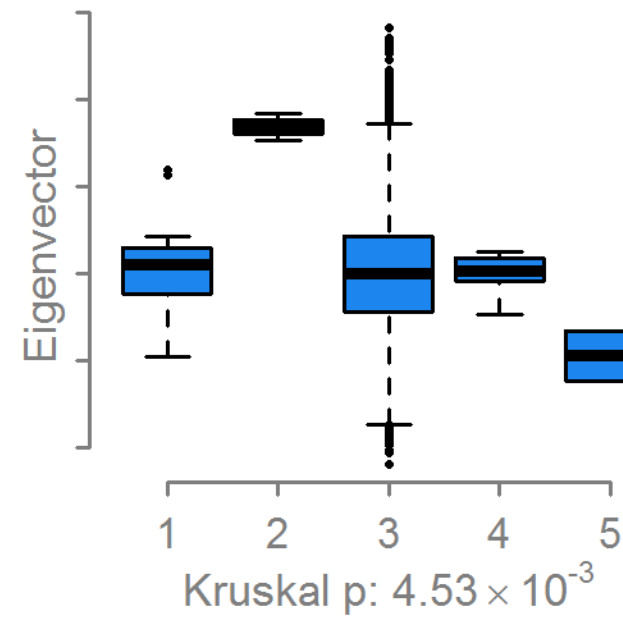

### Comp 24

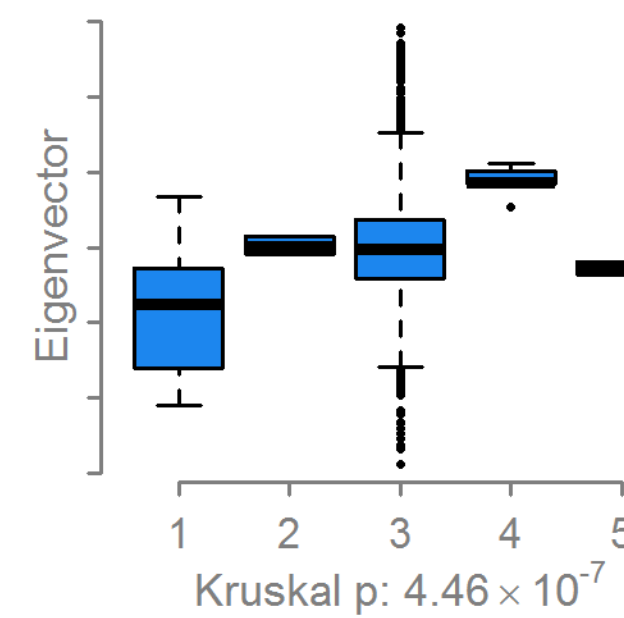

### Comp 25

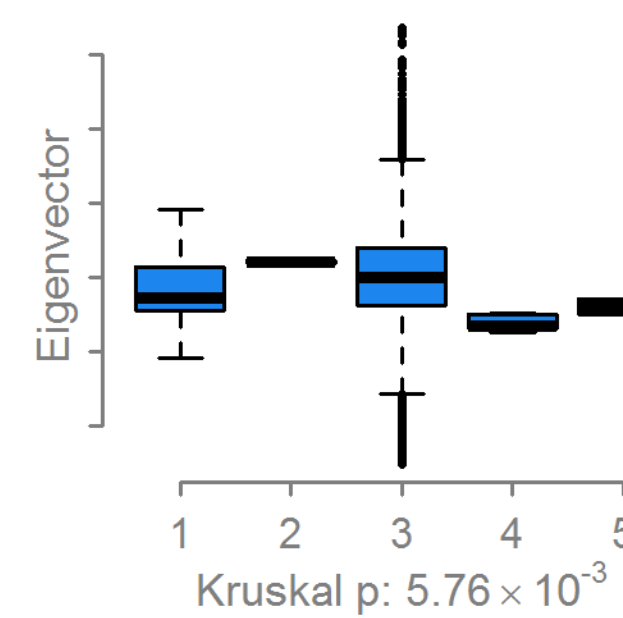

# Instrument model

1: 454 GS FLX Titanium

2: AB 5500xl Genetic Analyzer

3: AB SOLiD System 3.0

4: Helicos HeliScope

5: Illumina Genome Analyzer

6: Illumina Genome Analyzer II

7: Illumina Genome Analyzer Iix

8: Illumina HiSeq 1000

9: Illumina HiSeq 2000

10: Illumina HiSeq 2500

11: Illumina MiSeq

12: Ion Torrent PGM

### Comp 1

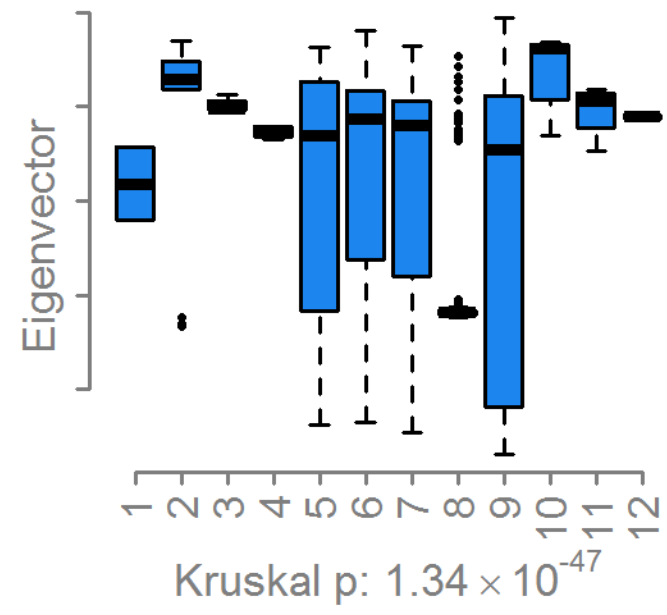

### Comp 2

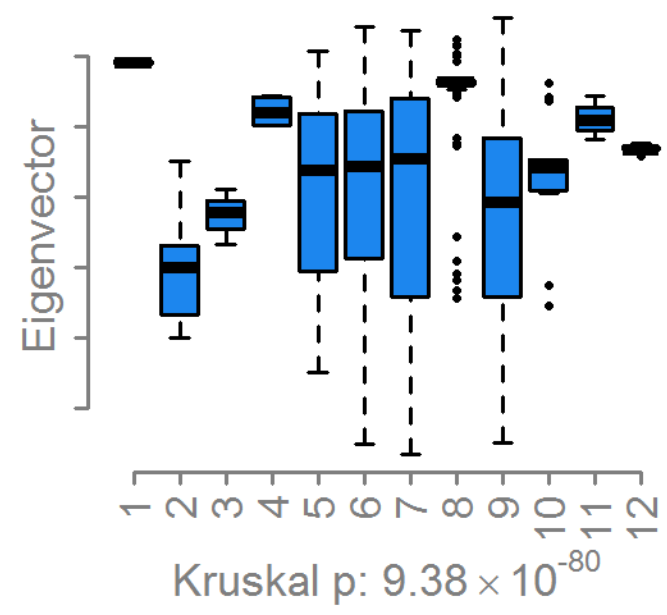

### Comp 3

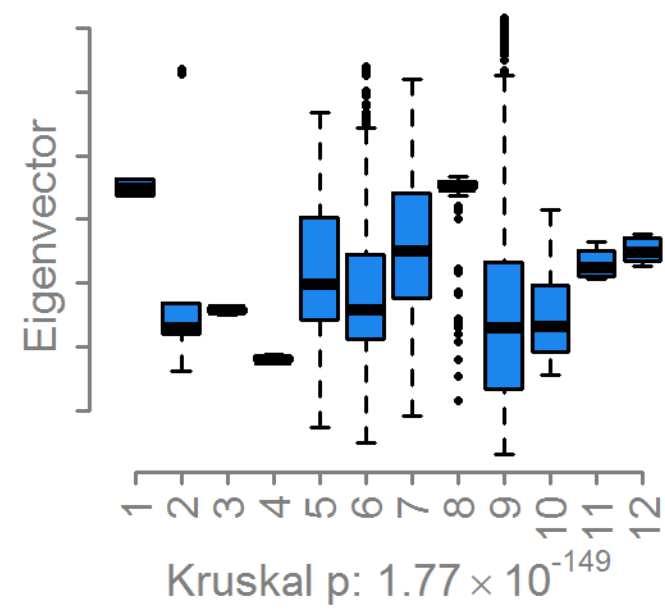

### Comp 4

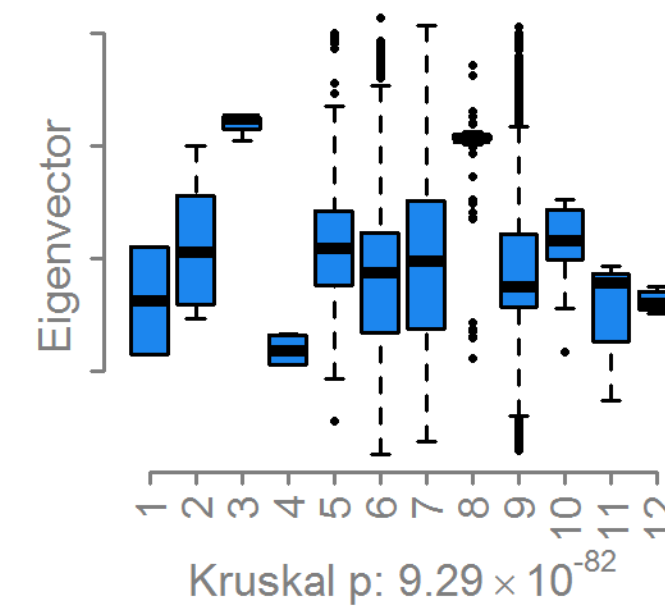

### Comp 5

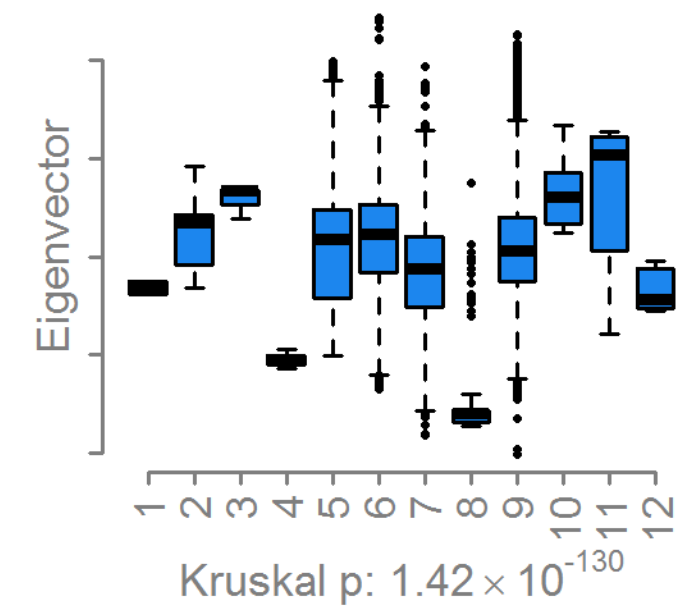

### Comp 6

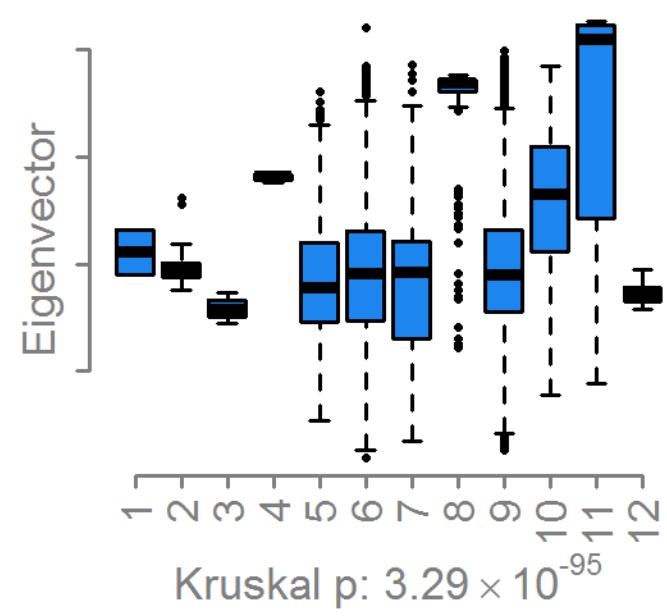

### Comp 7

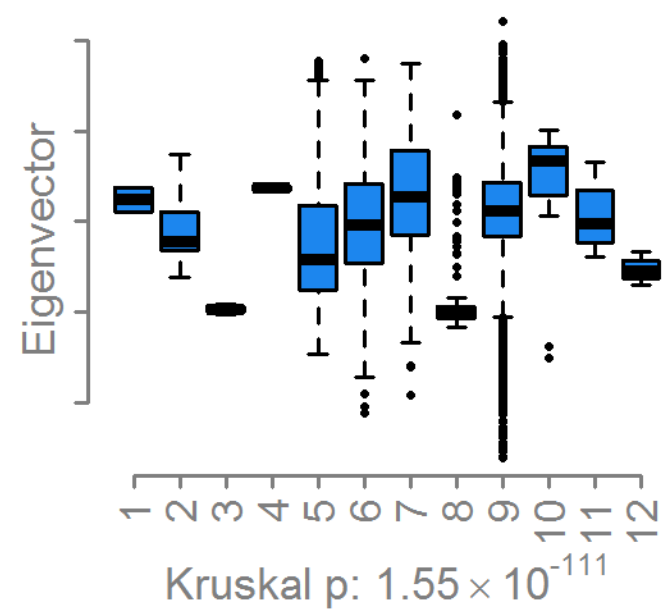

### Comp 8

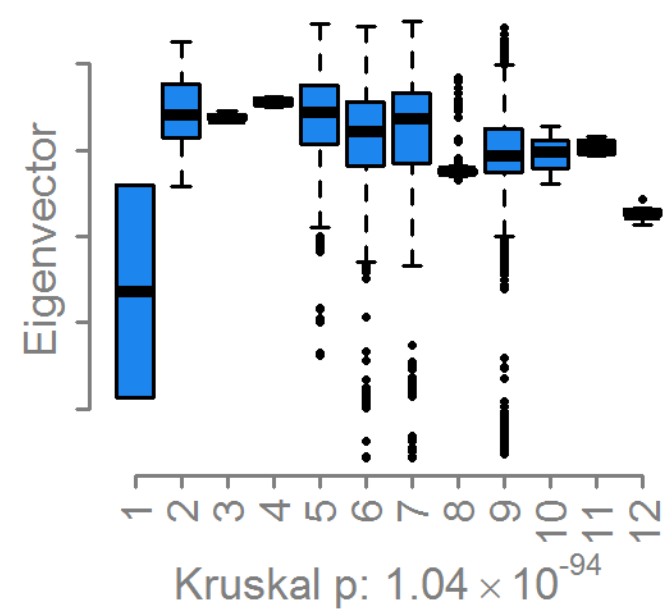

### Comp 9

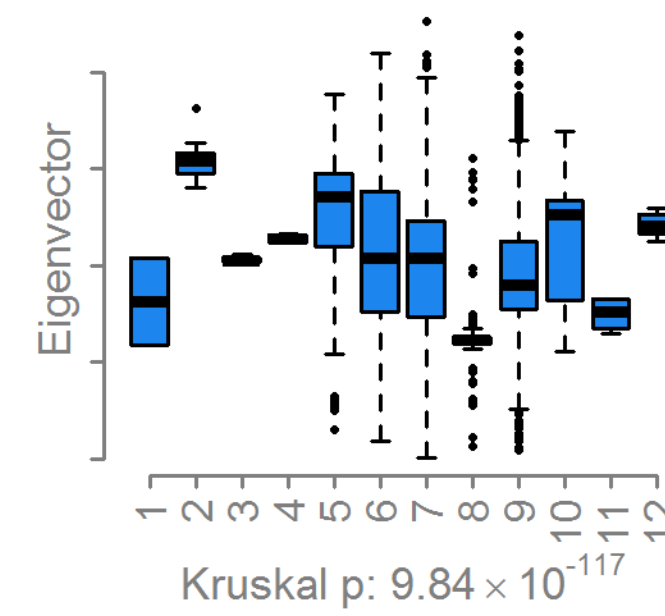

### Comp 10

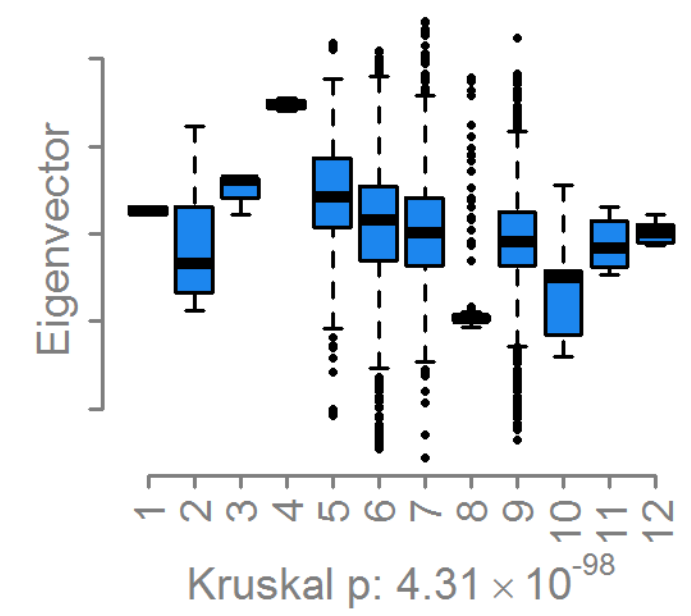

### Comp 11

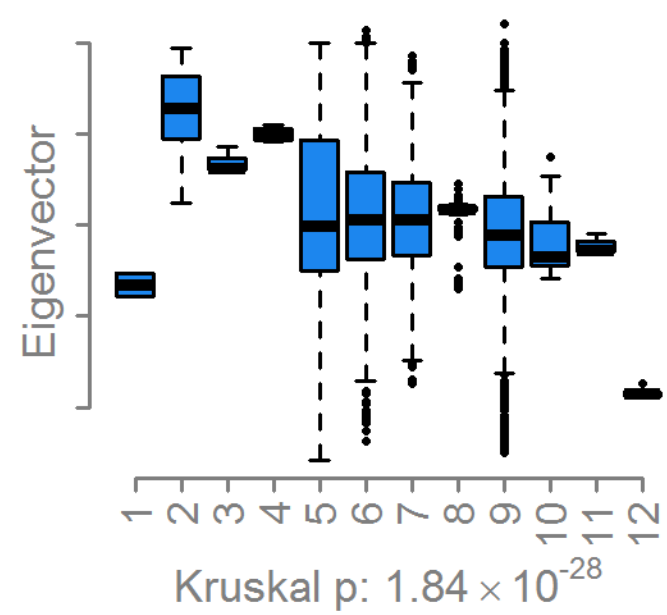

### Comp 12

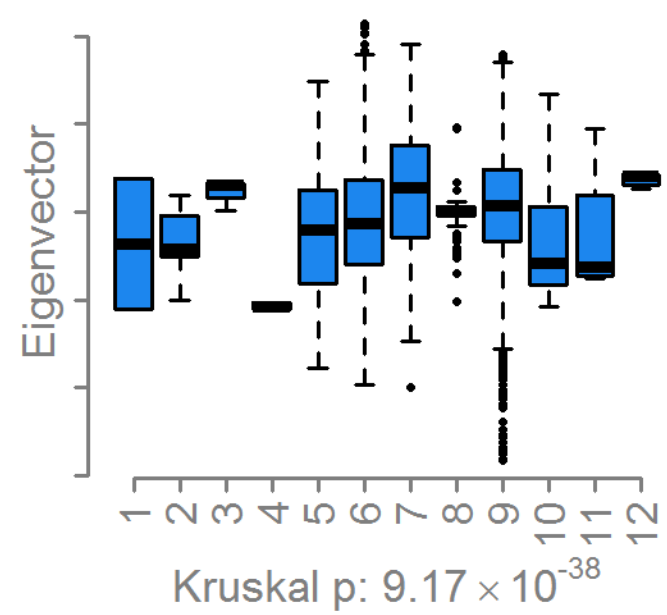

### Comp 13

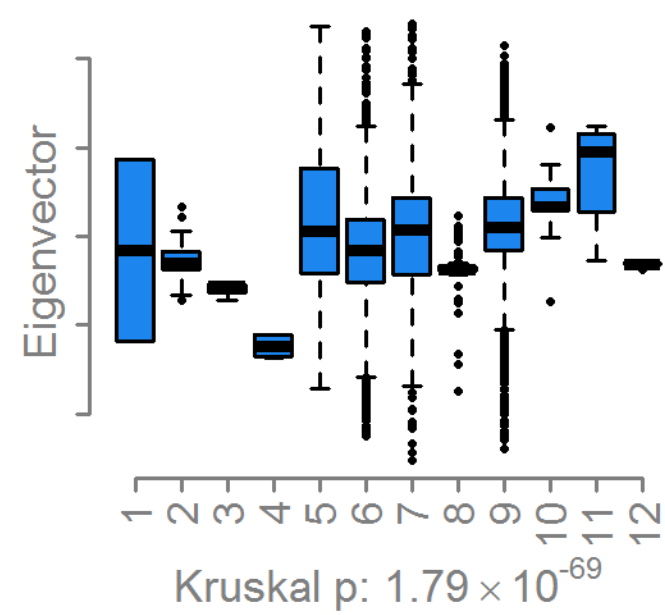

### Comp 14

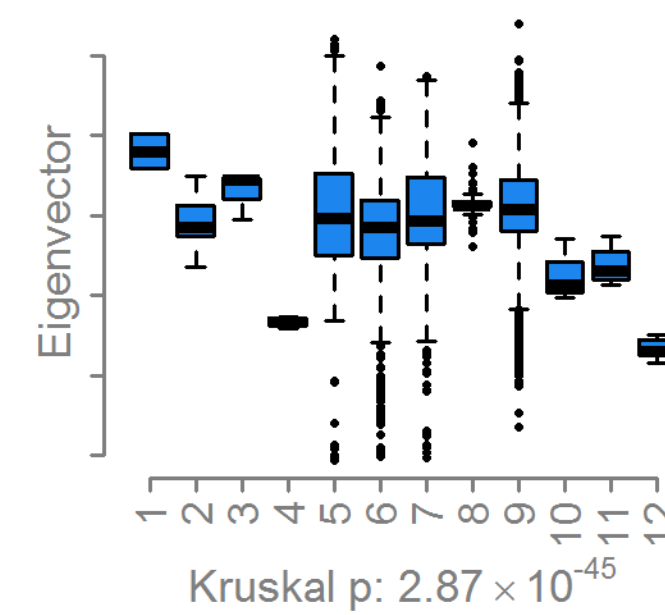

### Comp 15

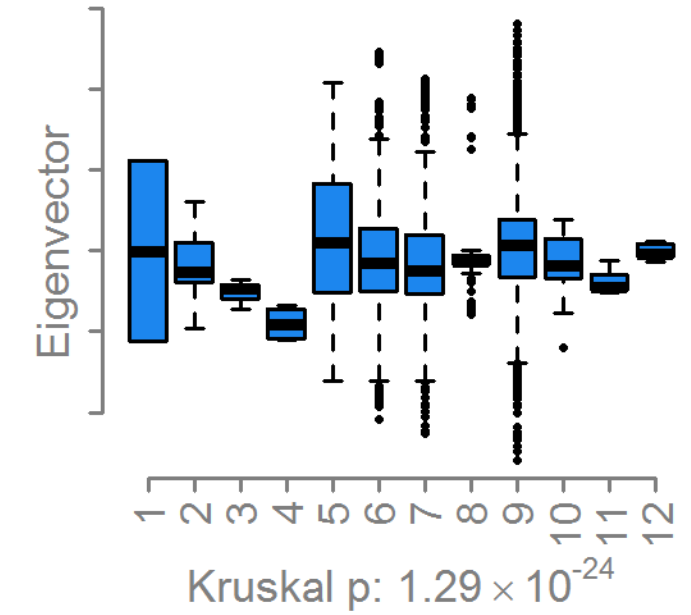

### Comp 16

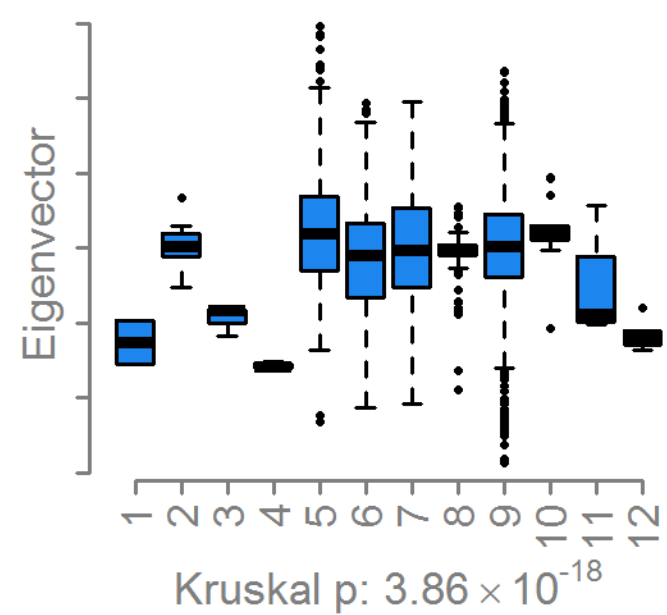

### Comp 17

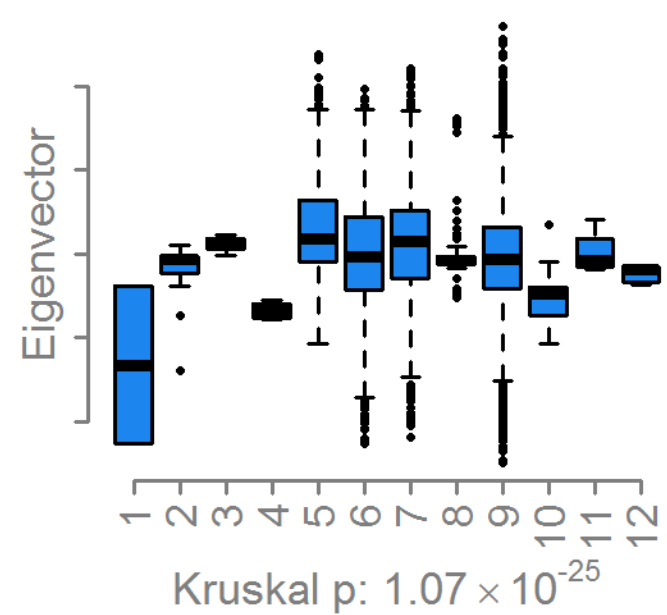

### Comp 18

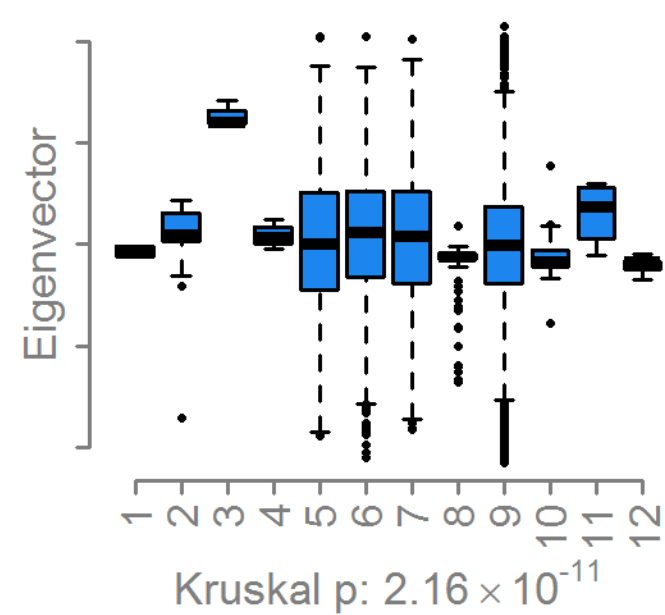

### Comp 19

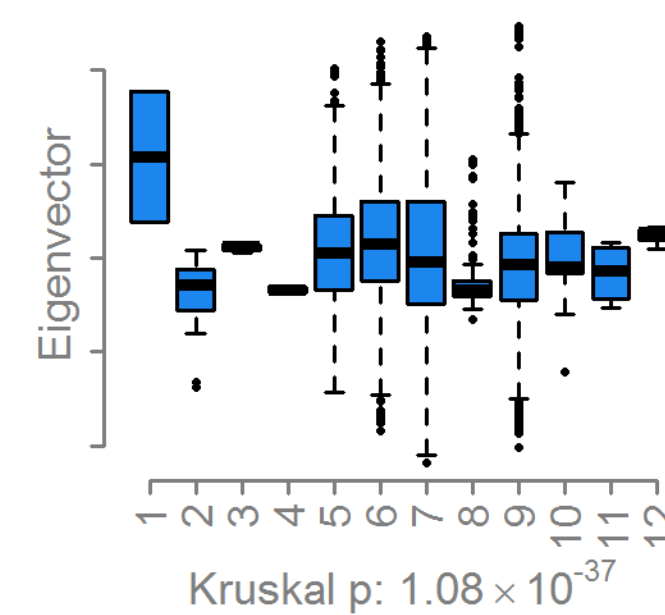

### Comp 20

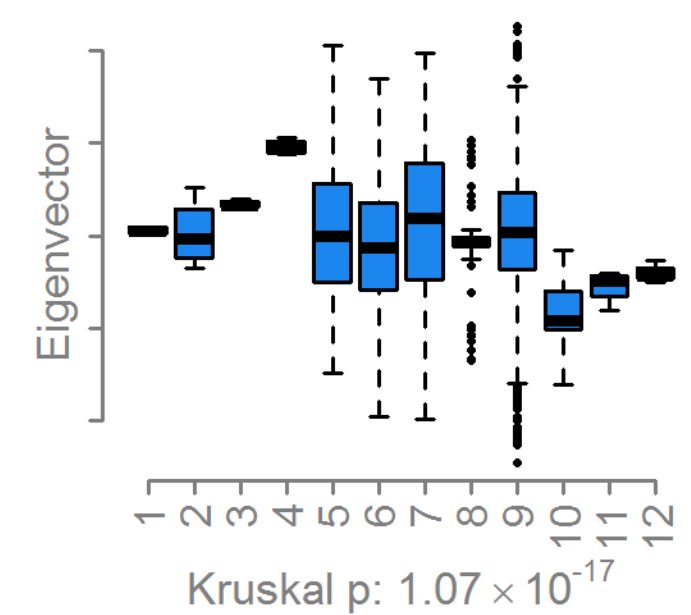

### Comp 21

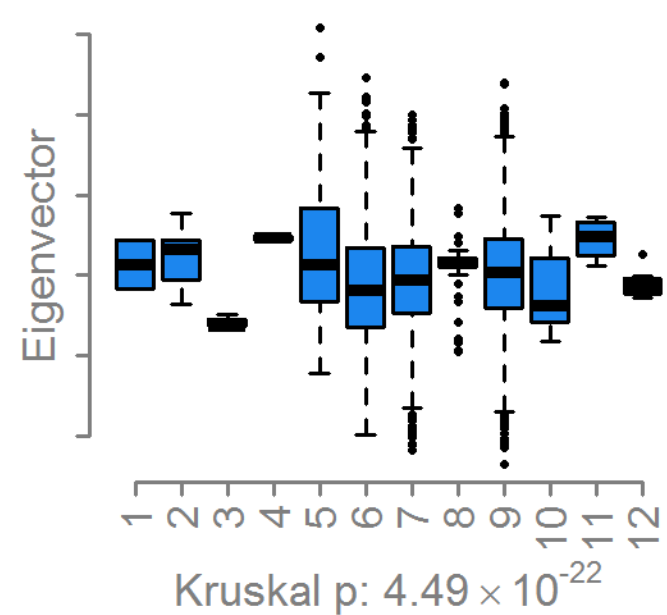

### Comp 22

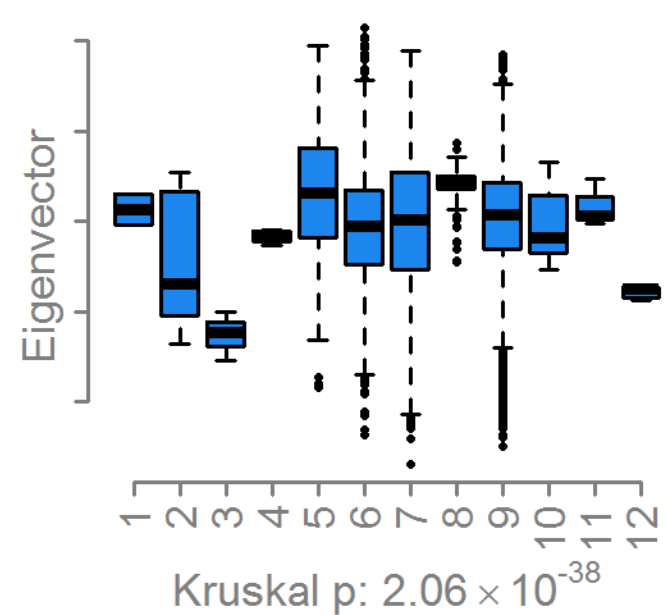

### Comp 23

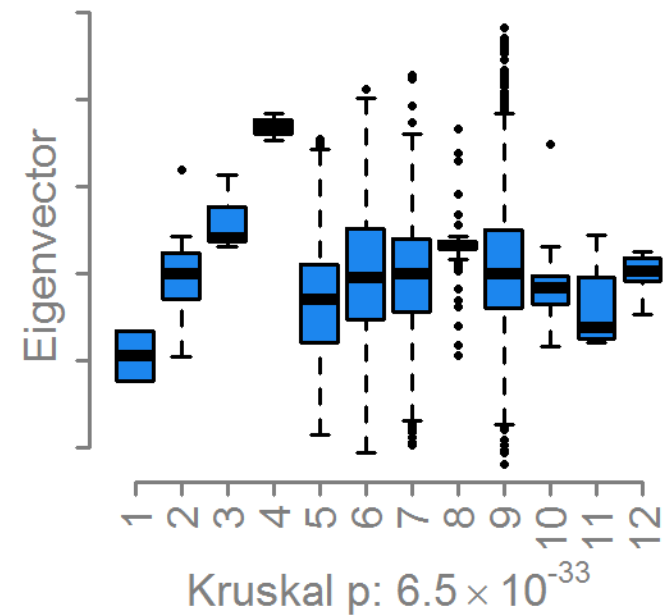

### Comp 24

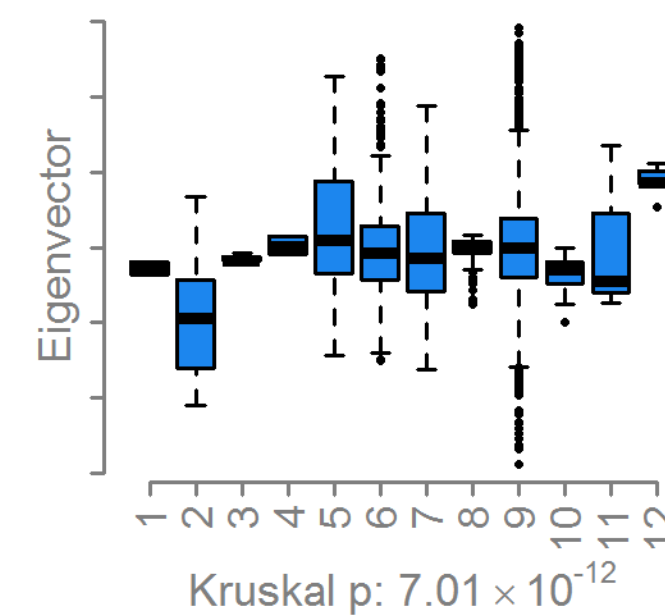

### Comp 25

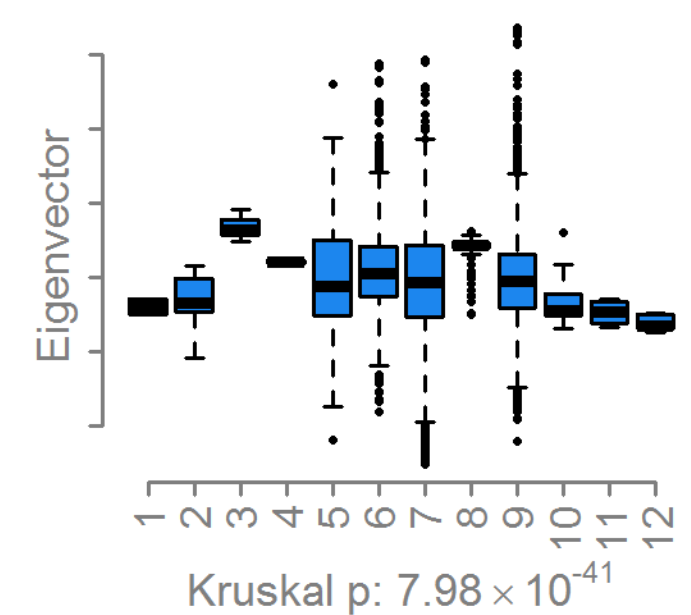

# Gender

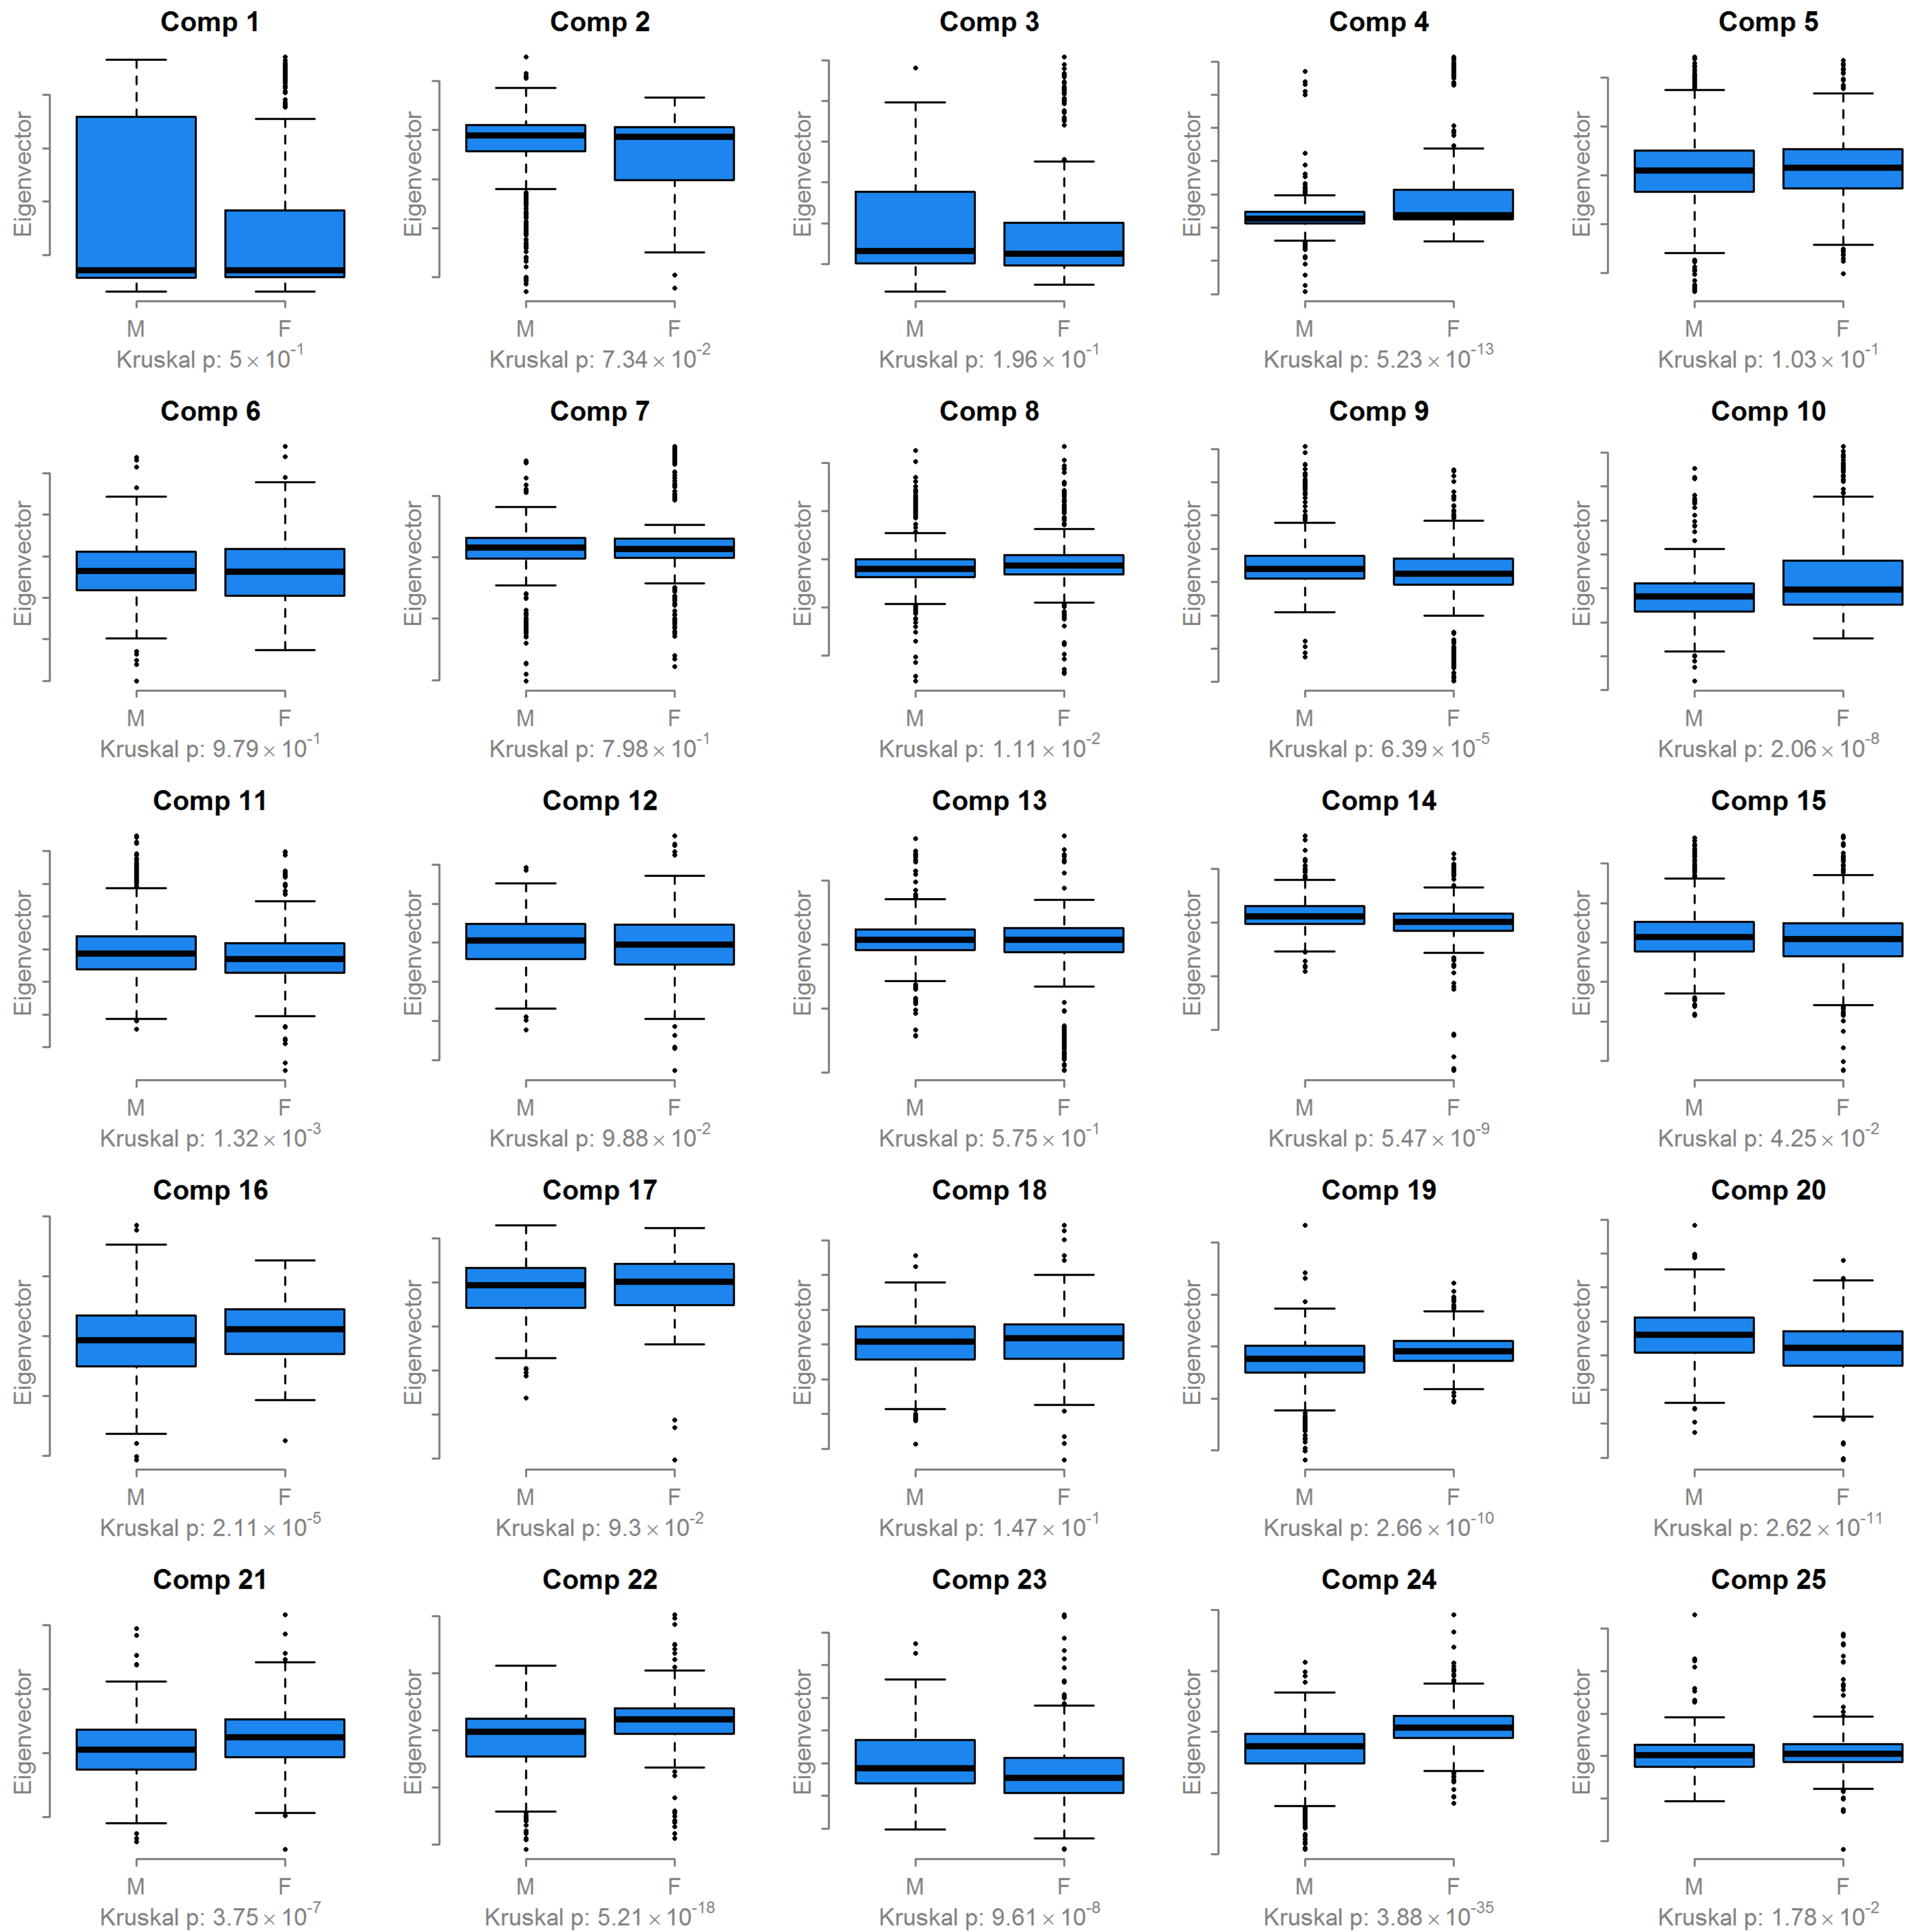

Supplement: 13073_2015_152_MOESM2_ESM.pdf [file 13073_2015_152_MOESM2_ESM.pdf]
