# Supplementary material for: Calling genotypes from public RNA-sequencing data enables identification of genetic variants that affect gene-expression levels
Source: PubMed Central journal article supplement (PMC4423486; doi:10.1186/s13073-015-0152-4), 2015-03-27

# Chromosome 1

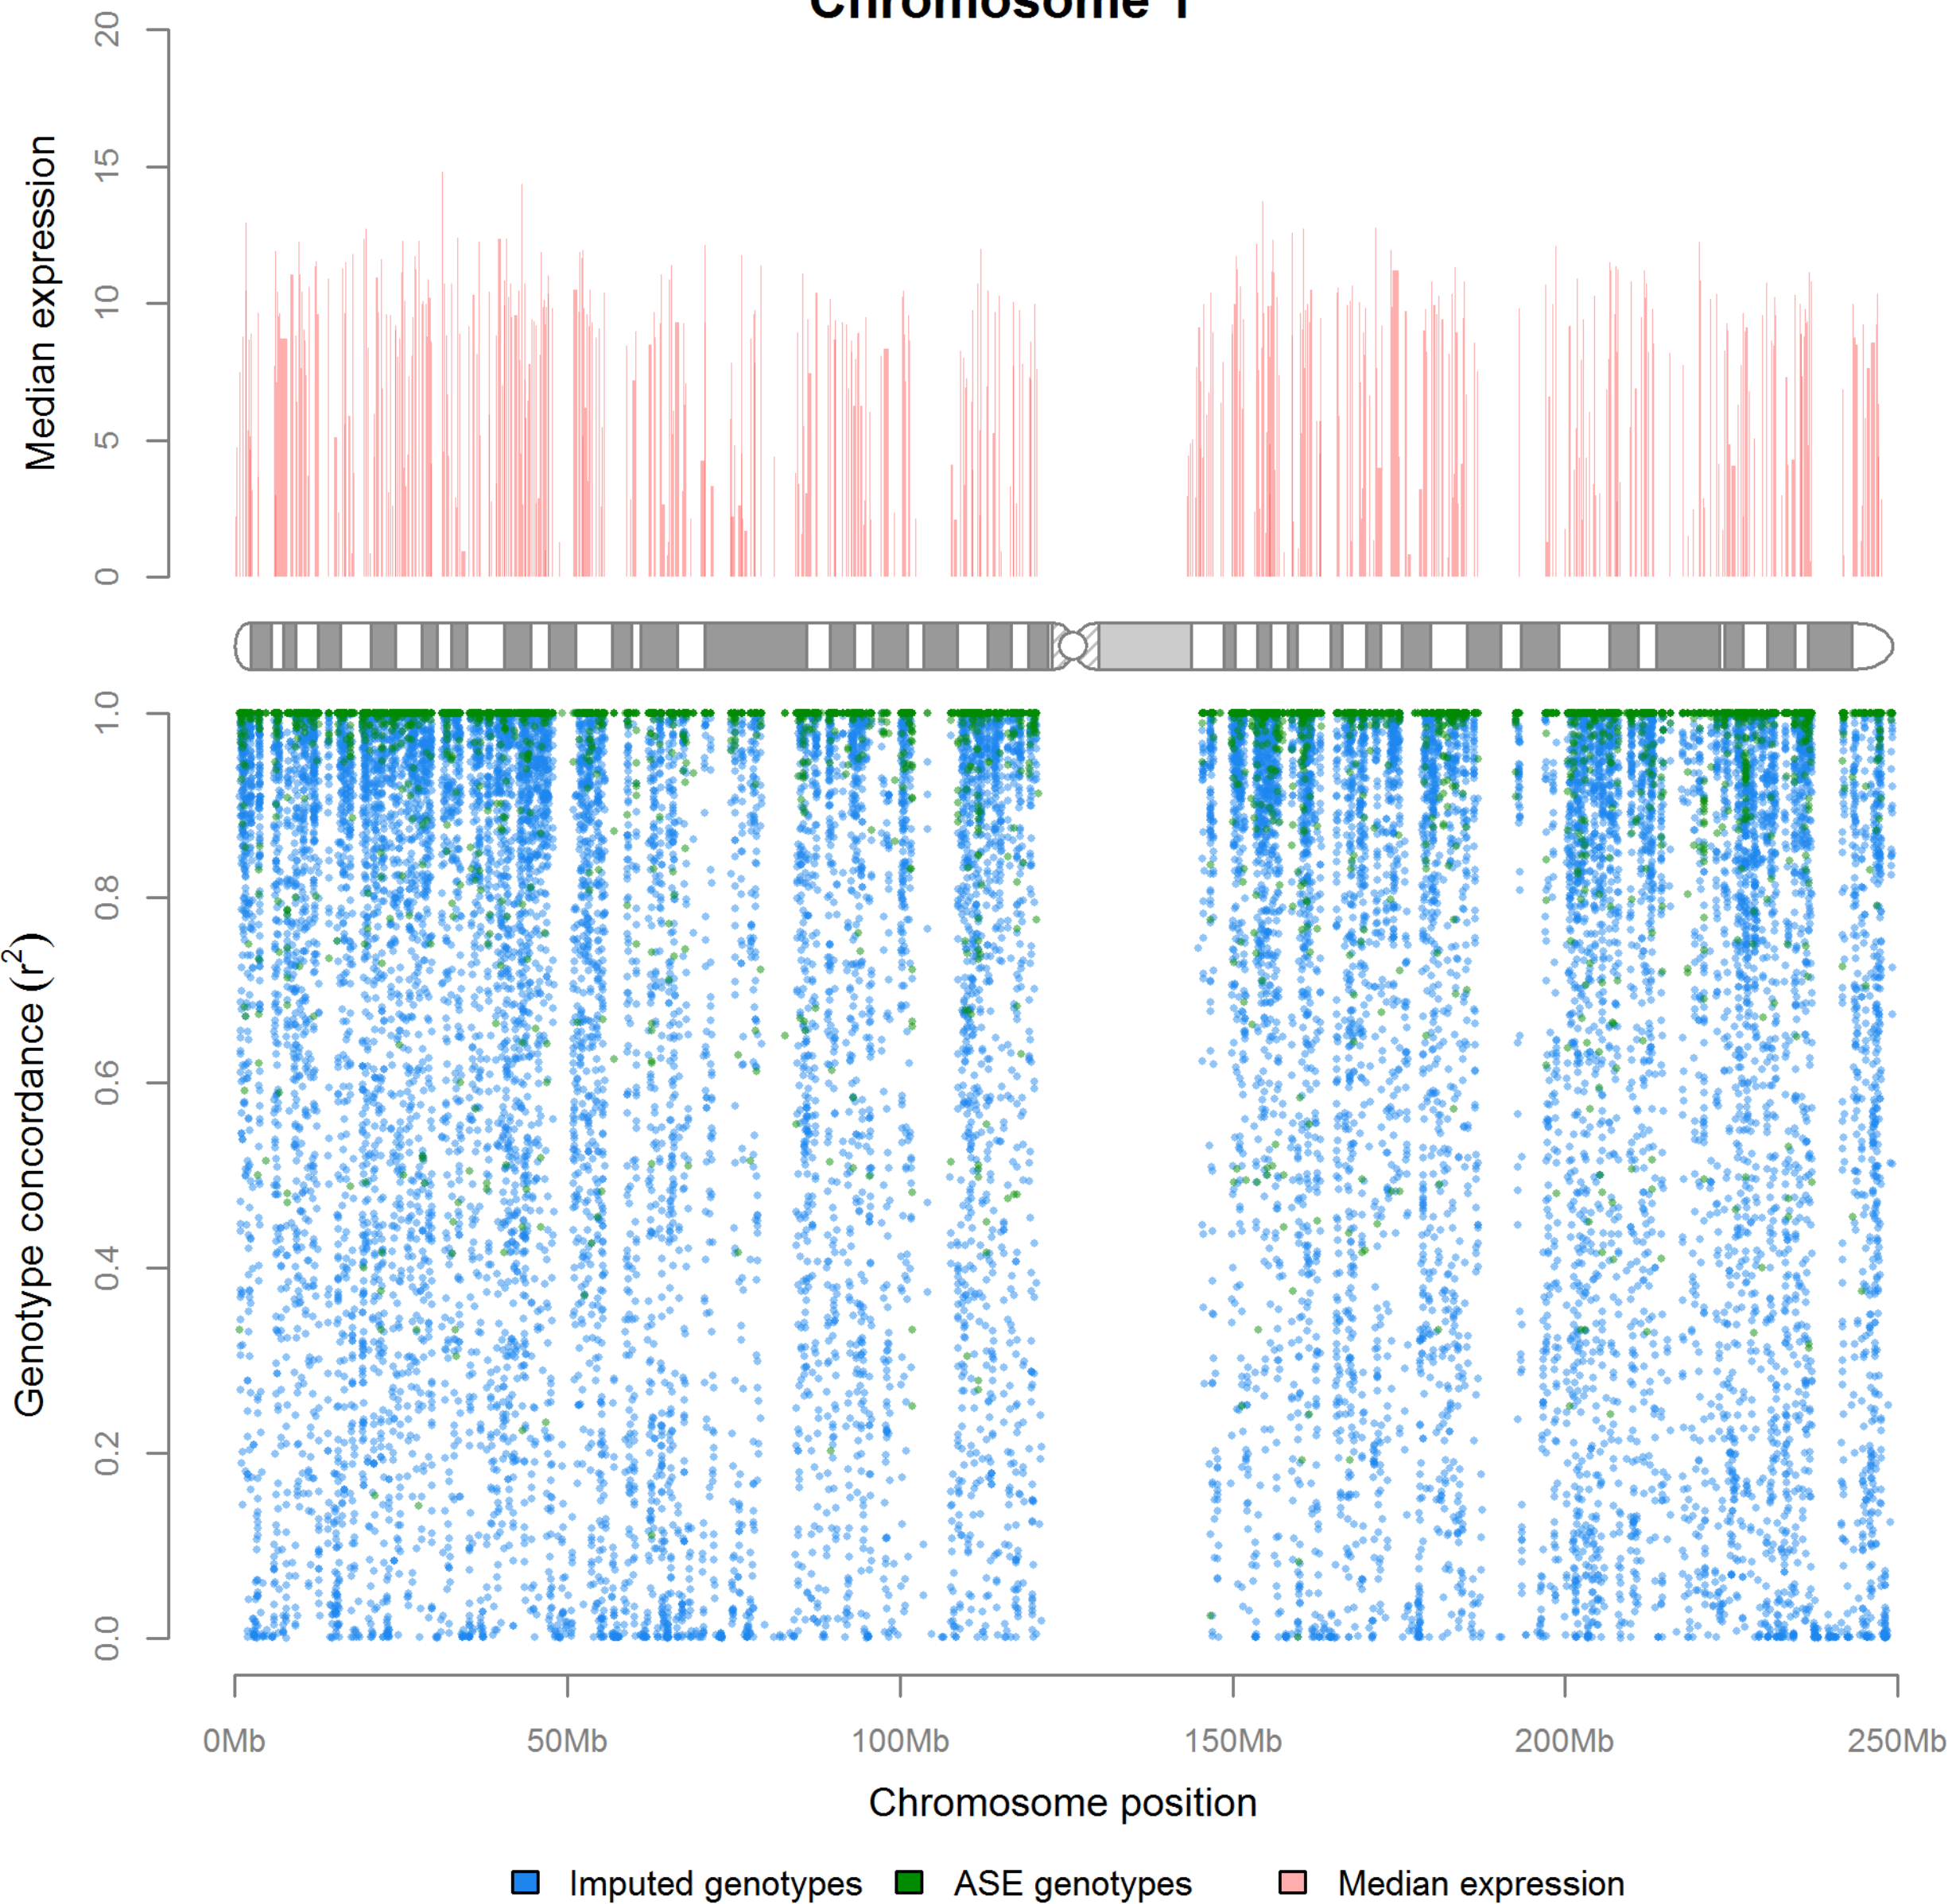

# Chromosome 2

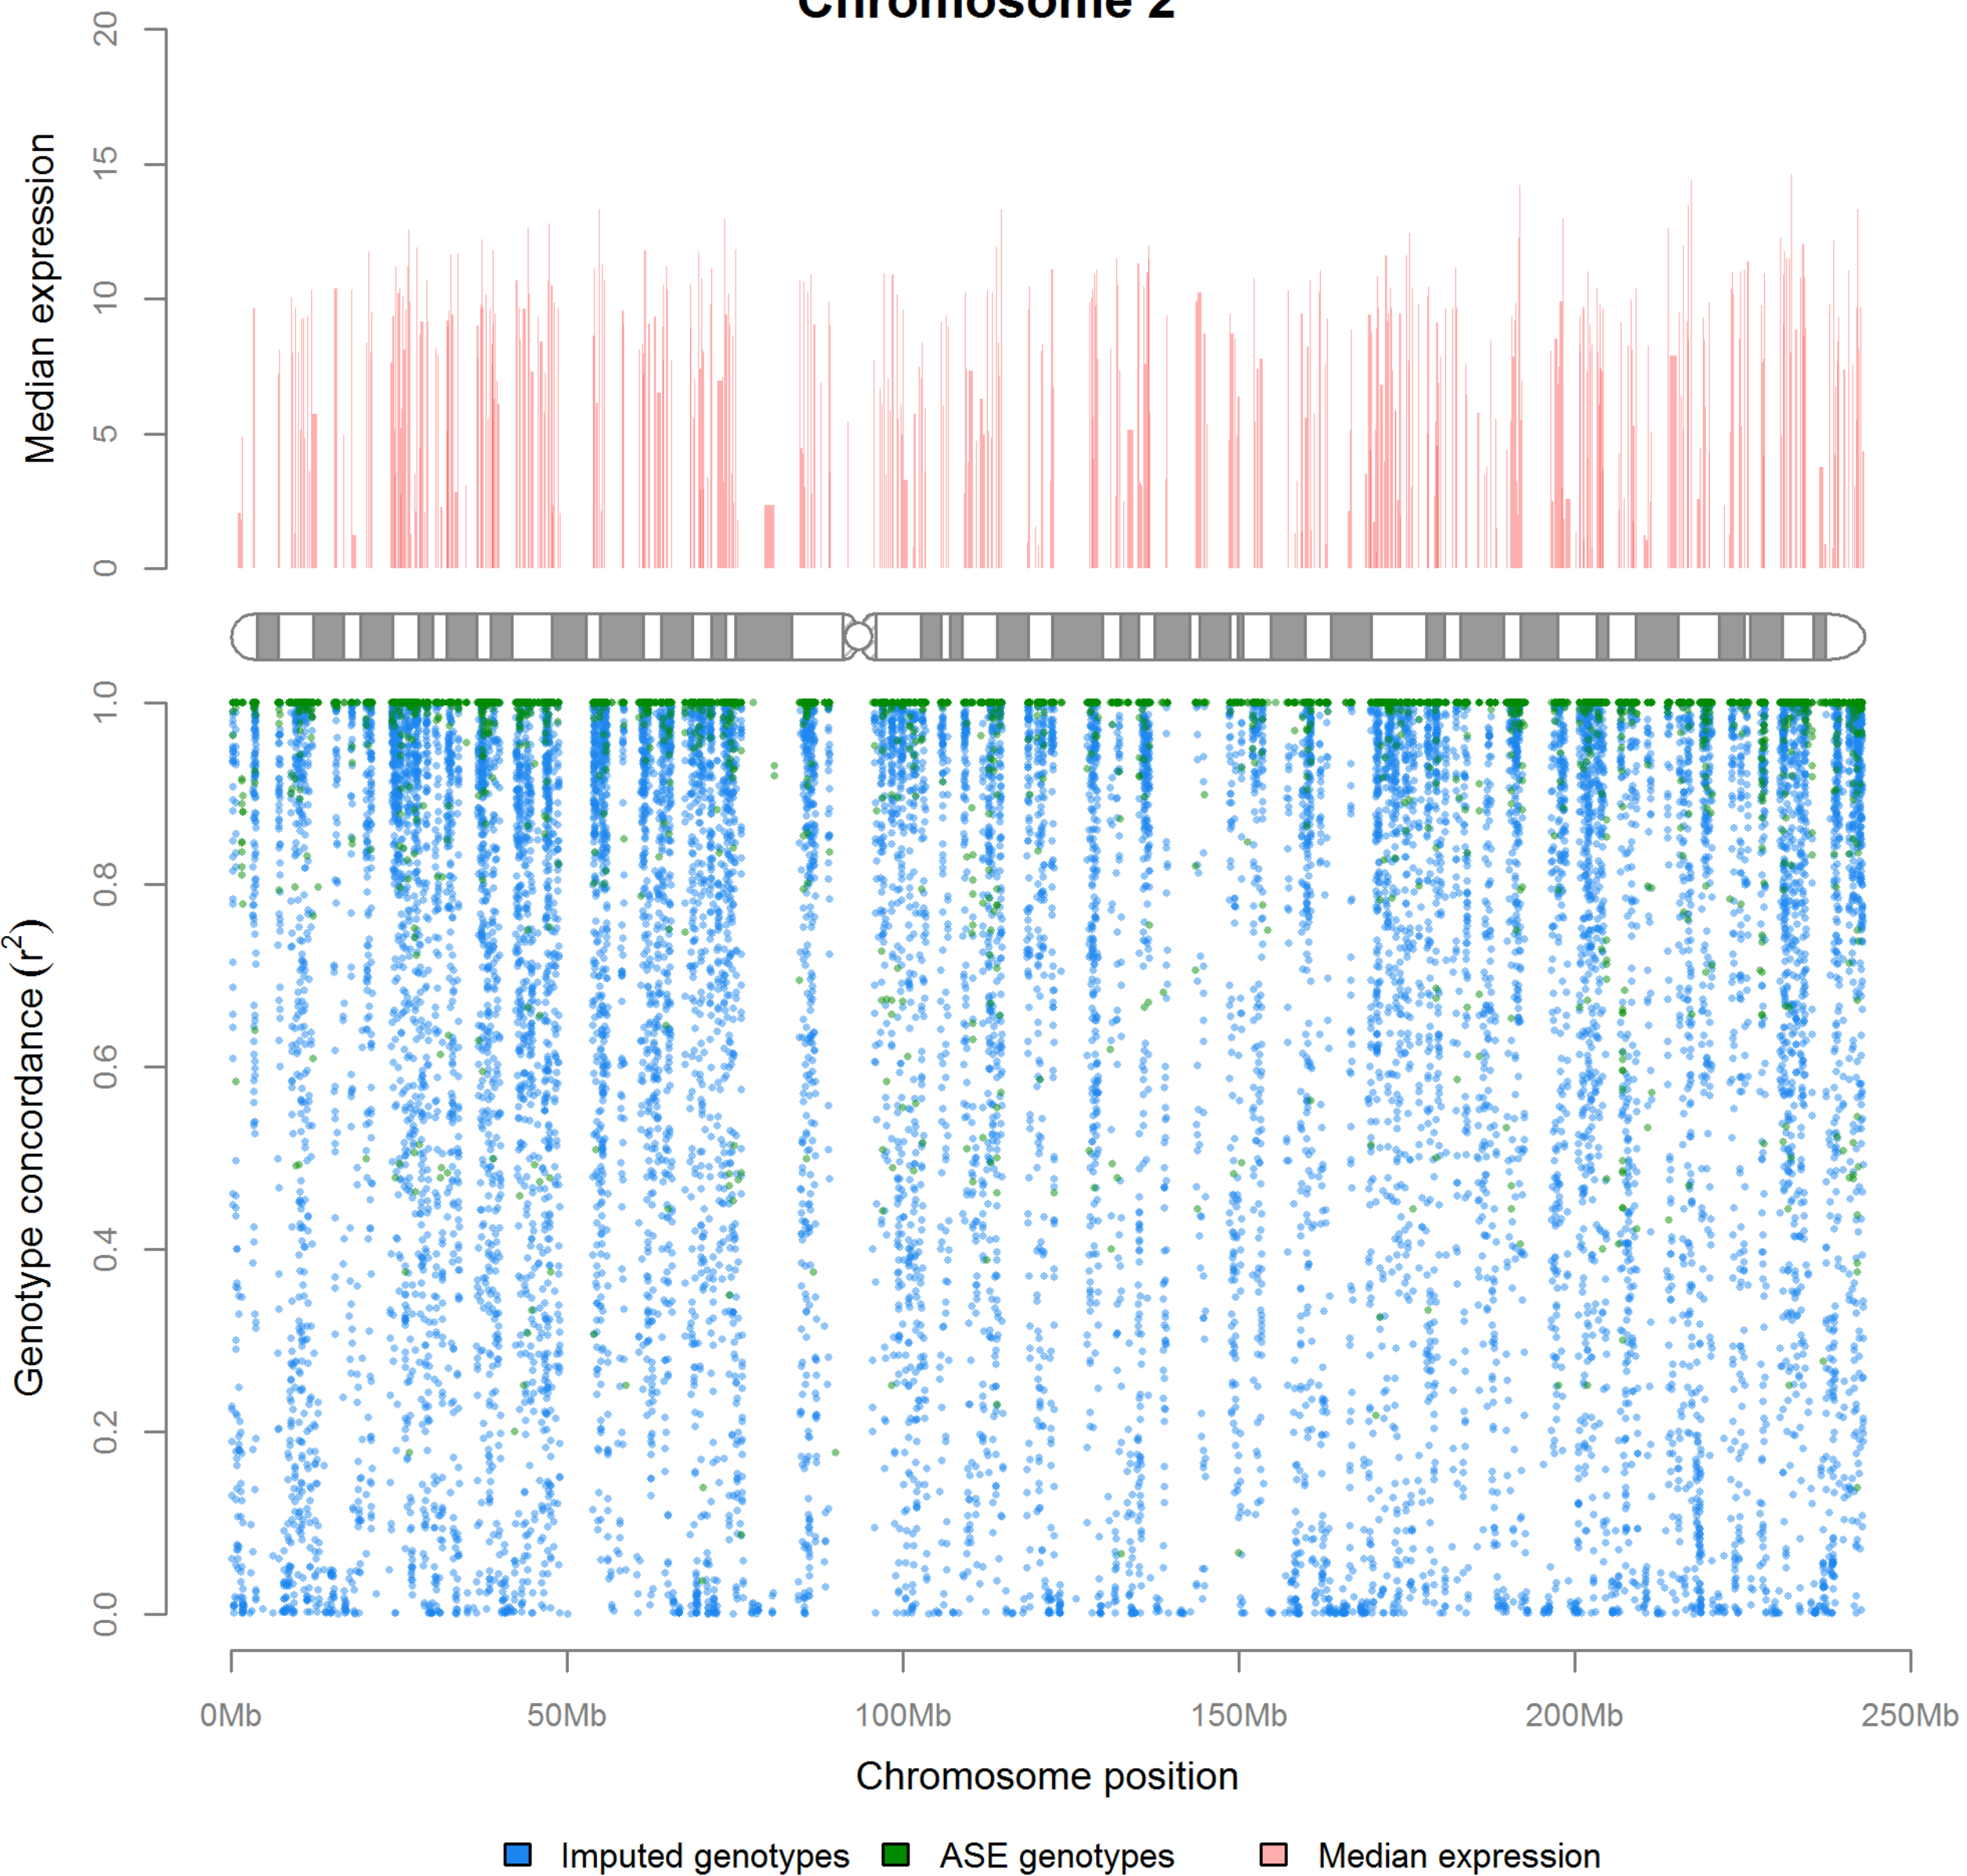

# Chromosome 3

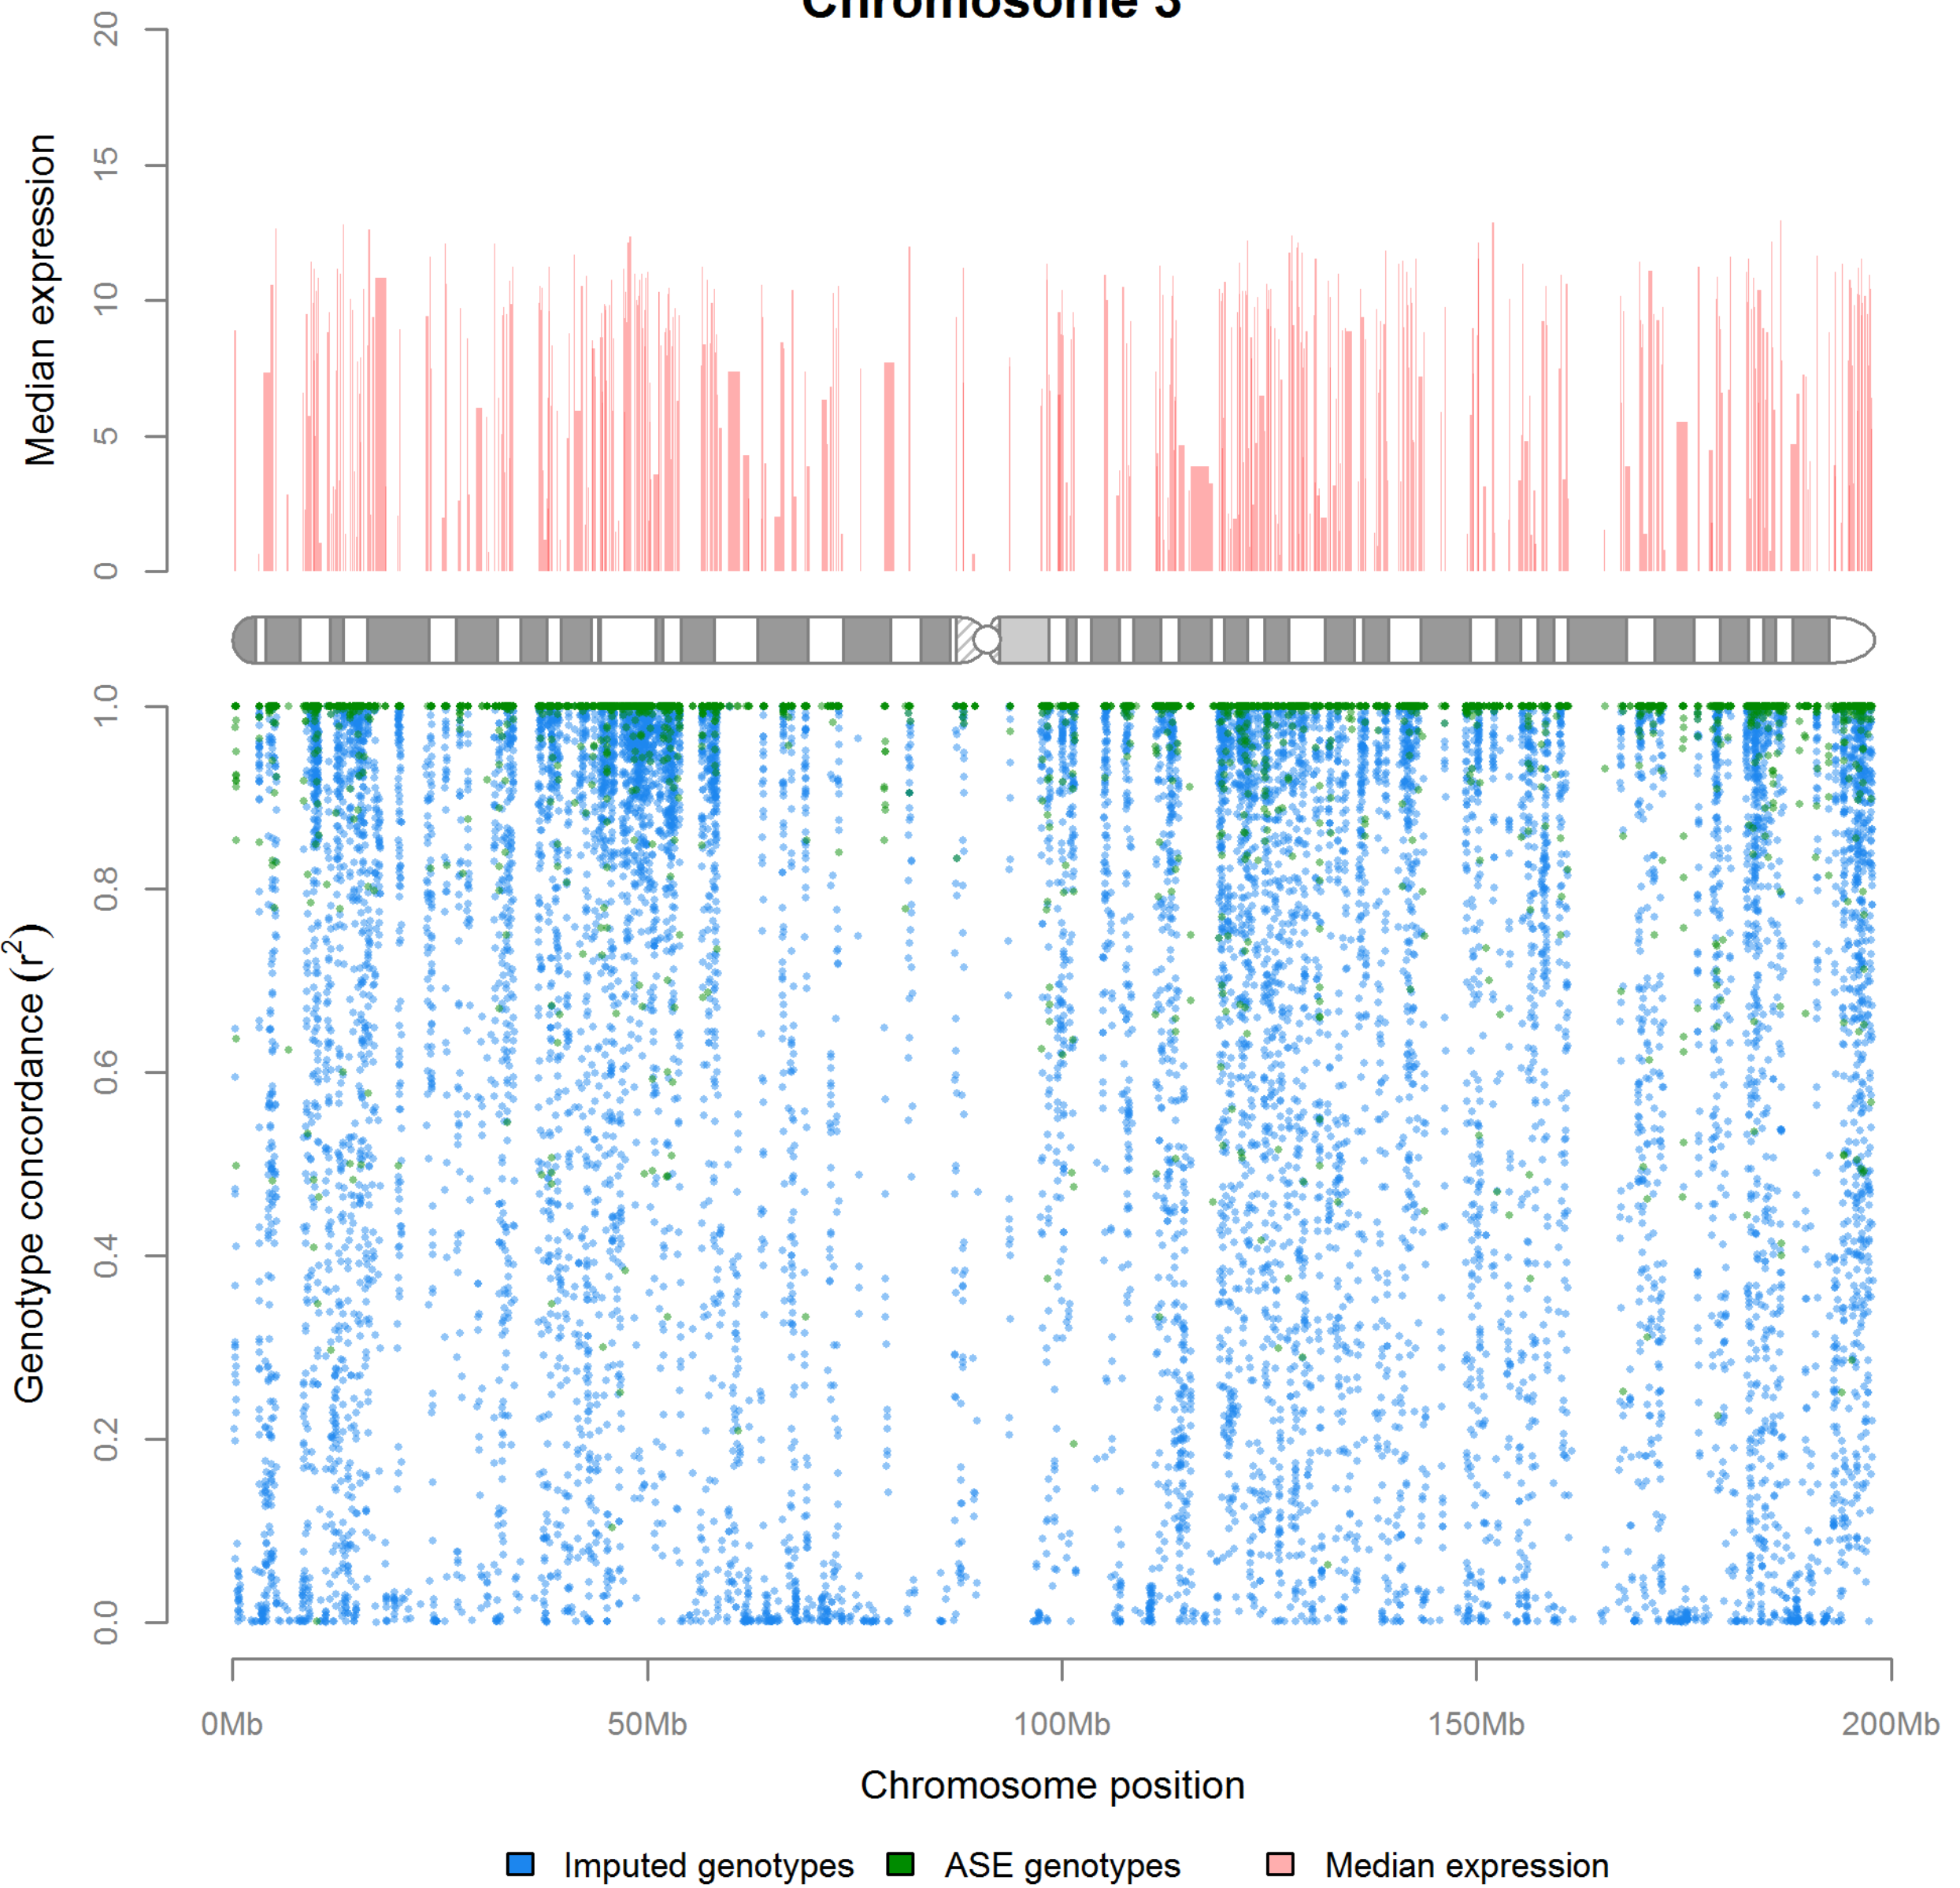

# Chromosome 4

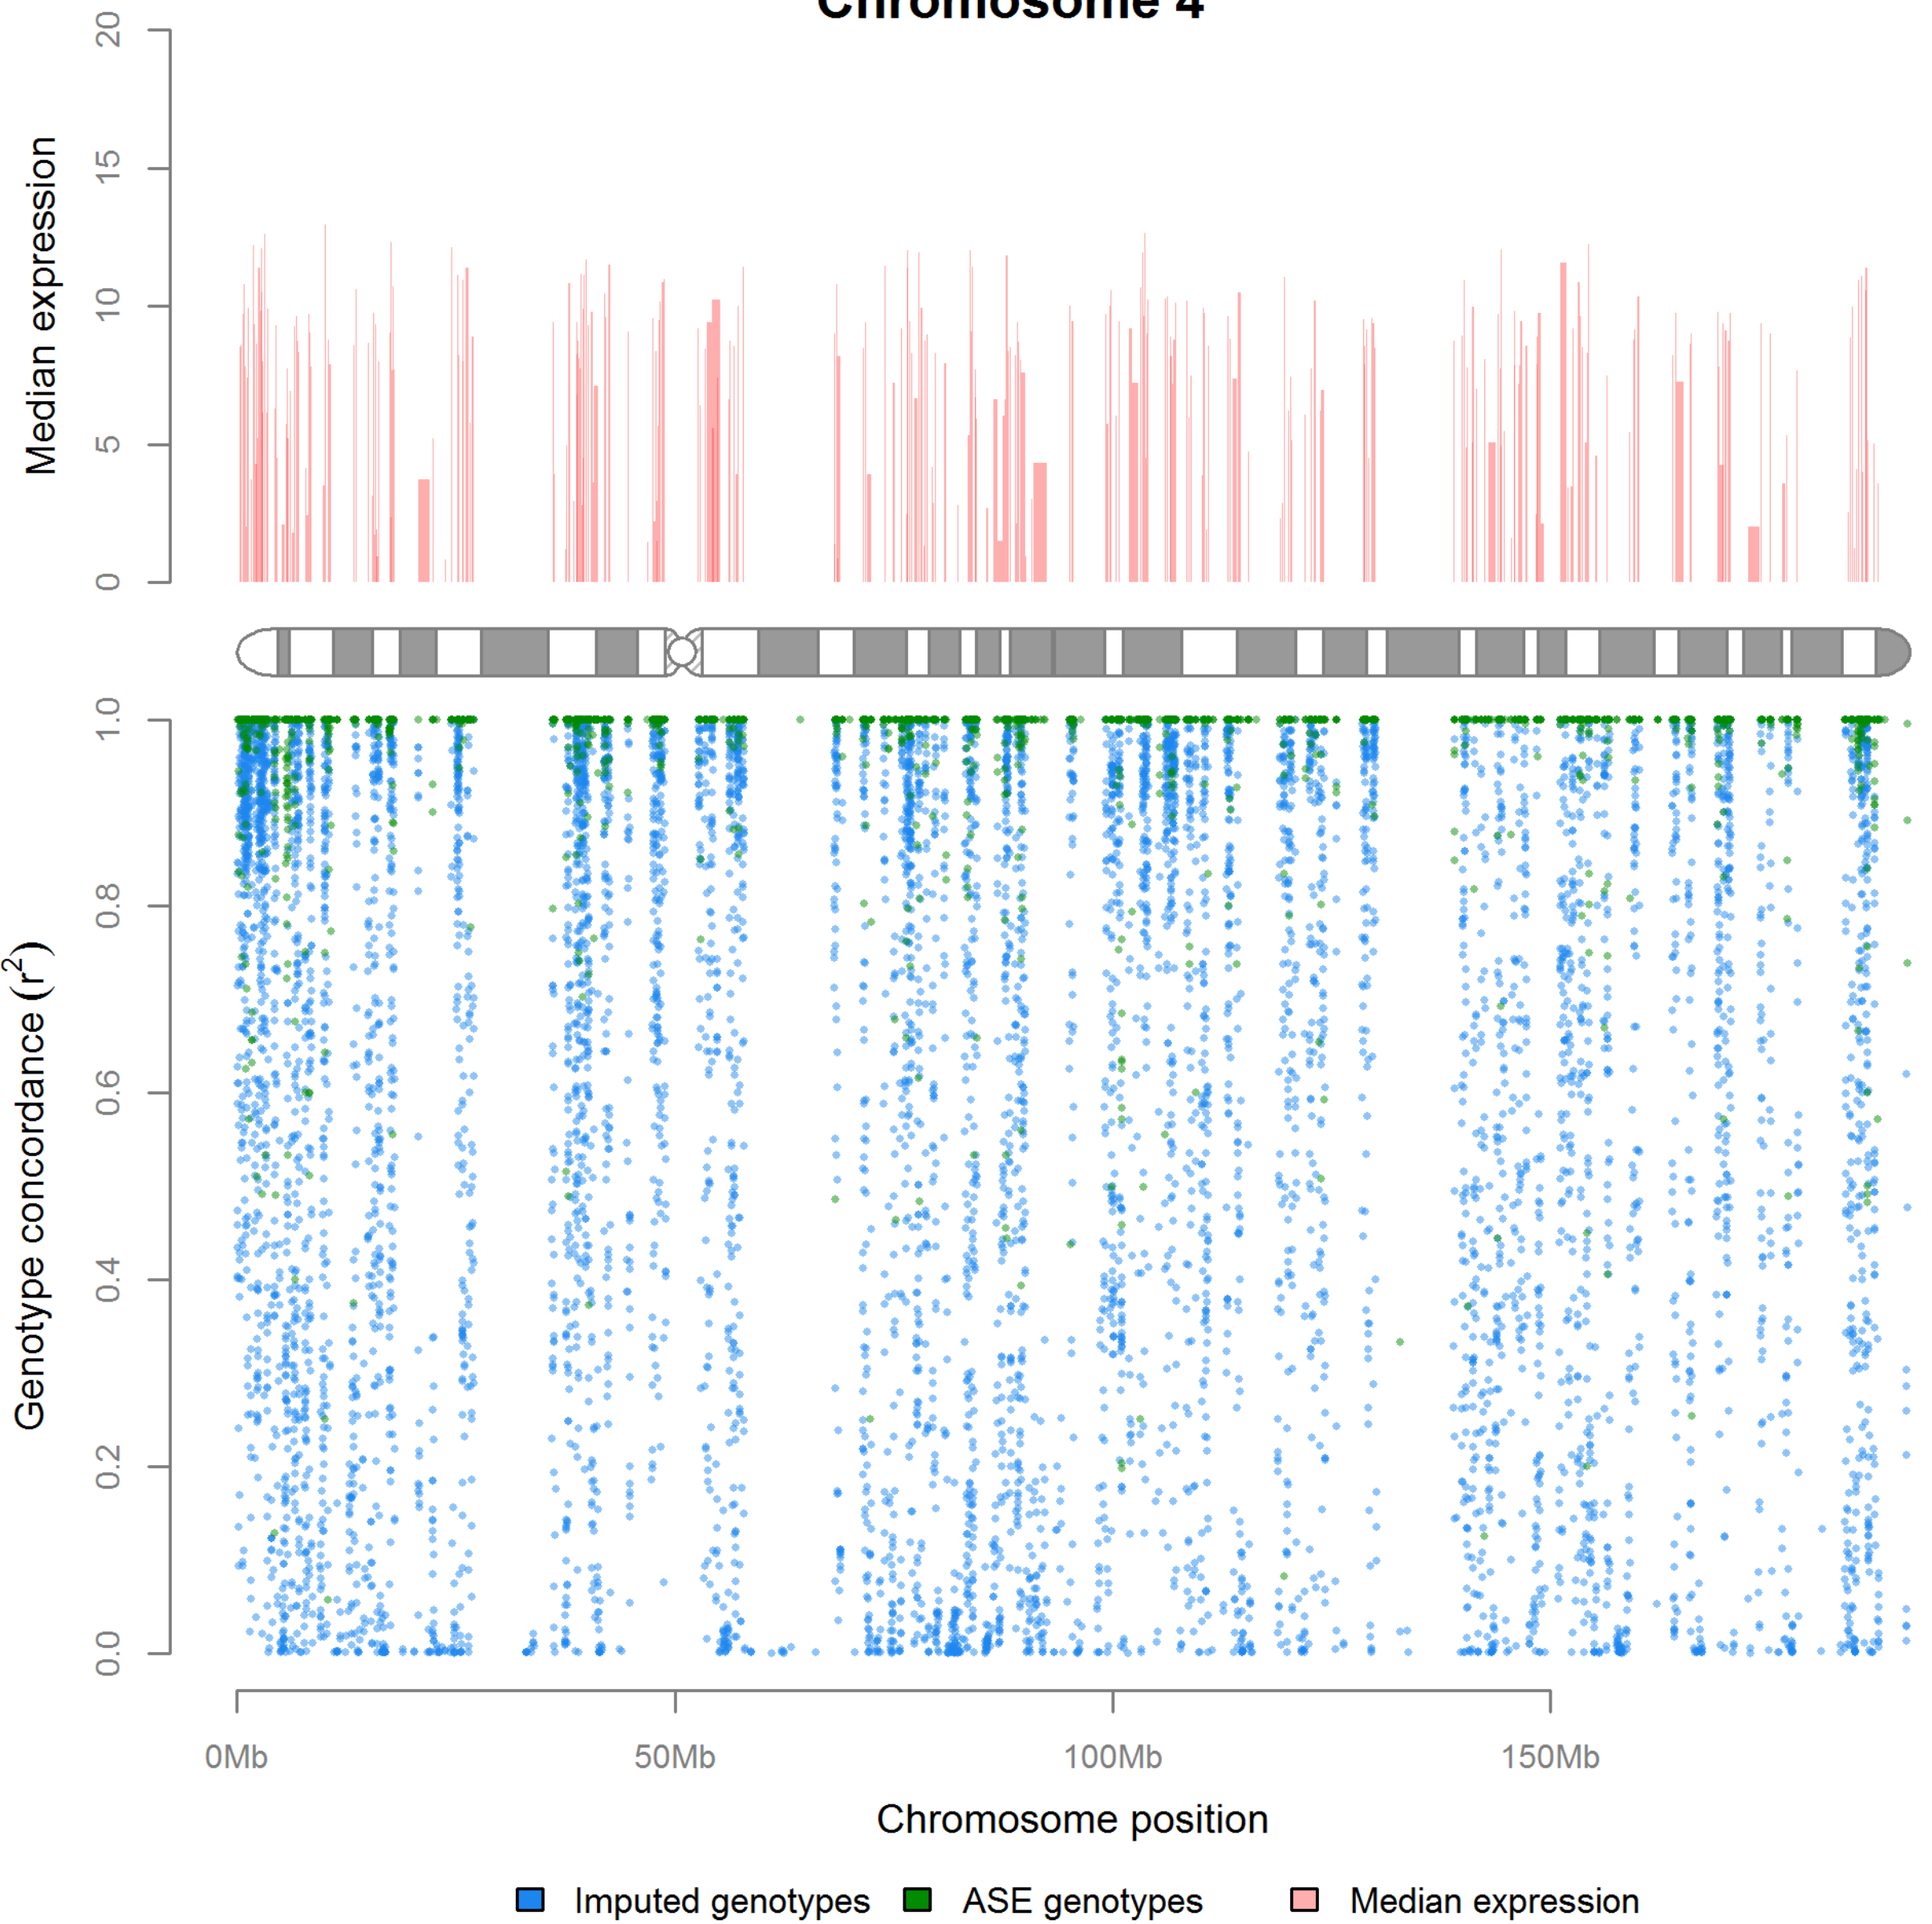

# Chromosome 5

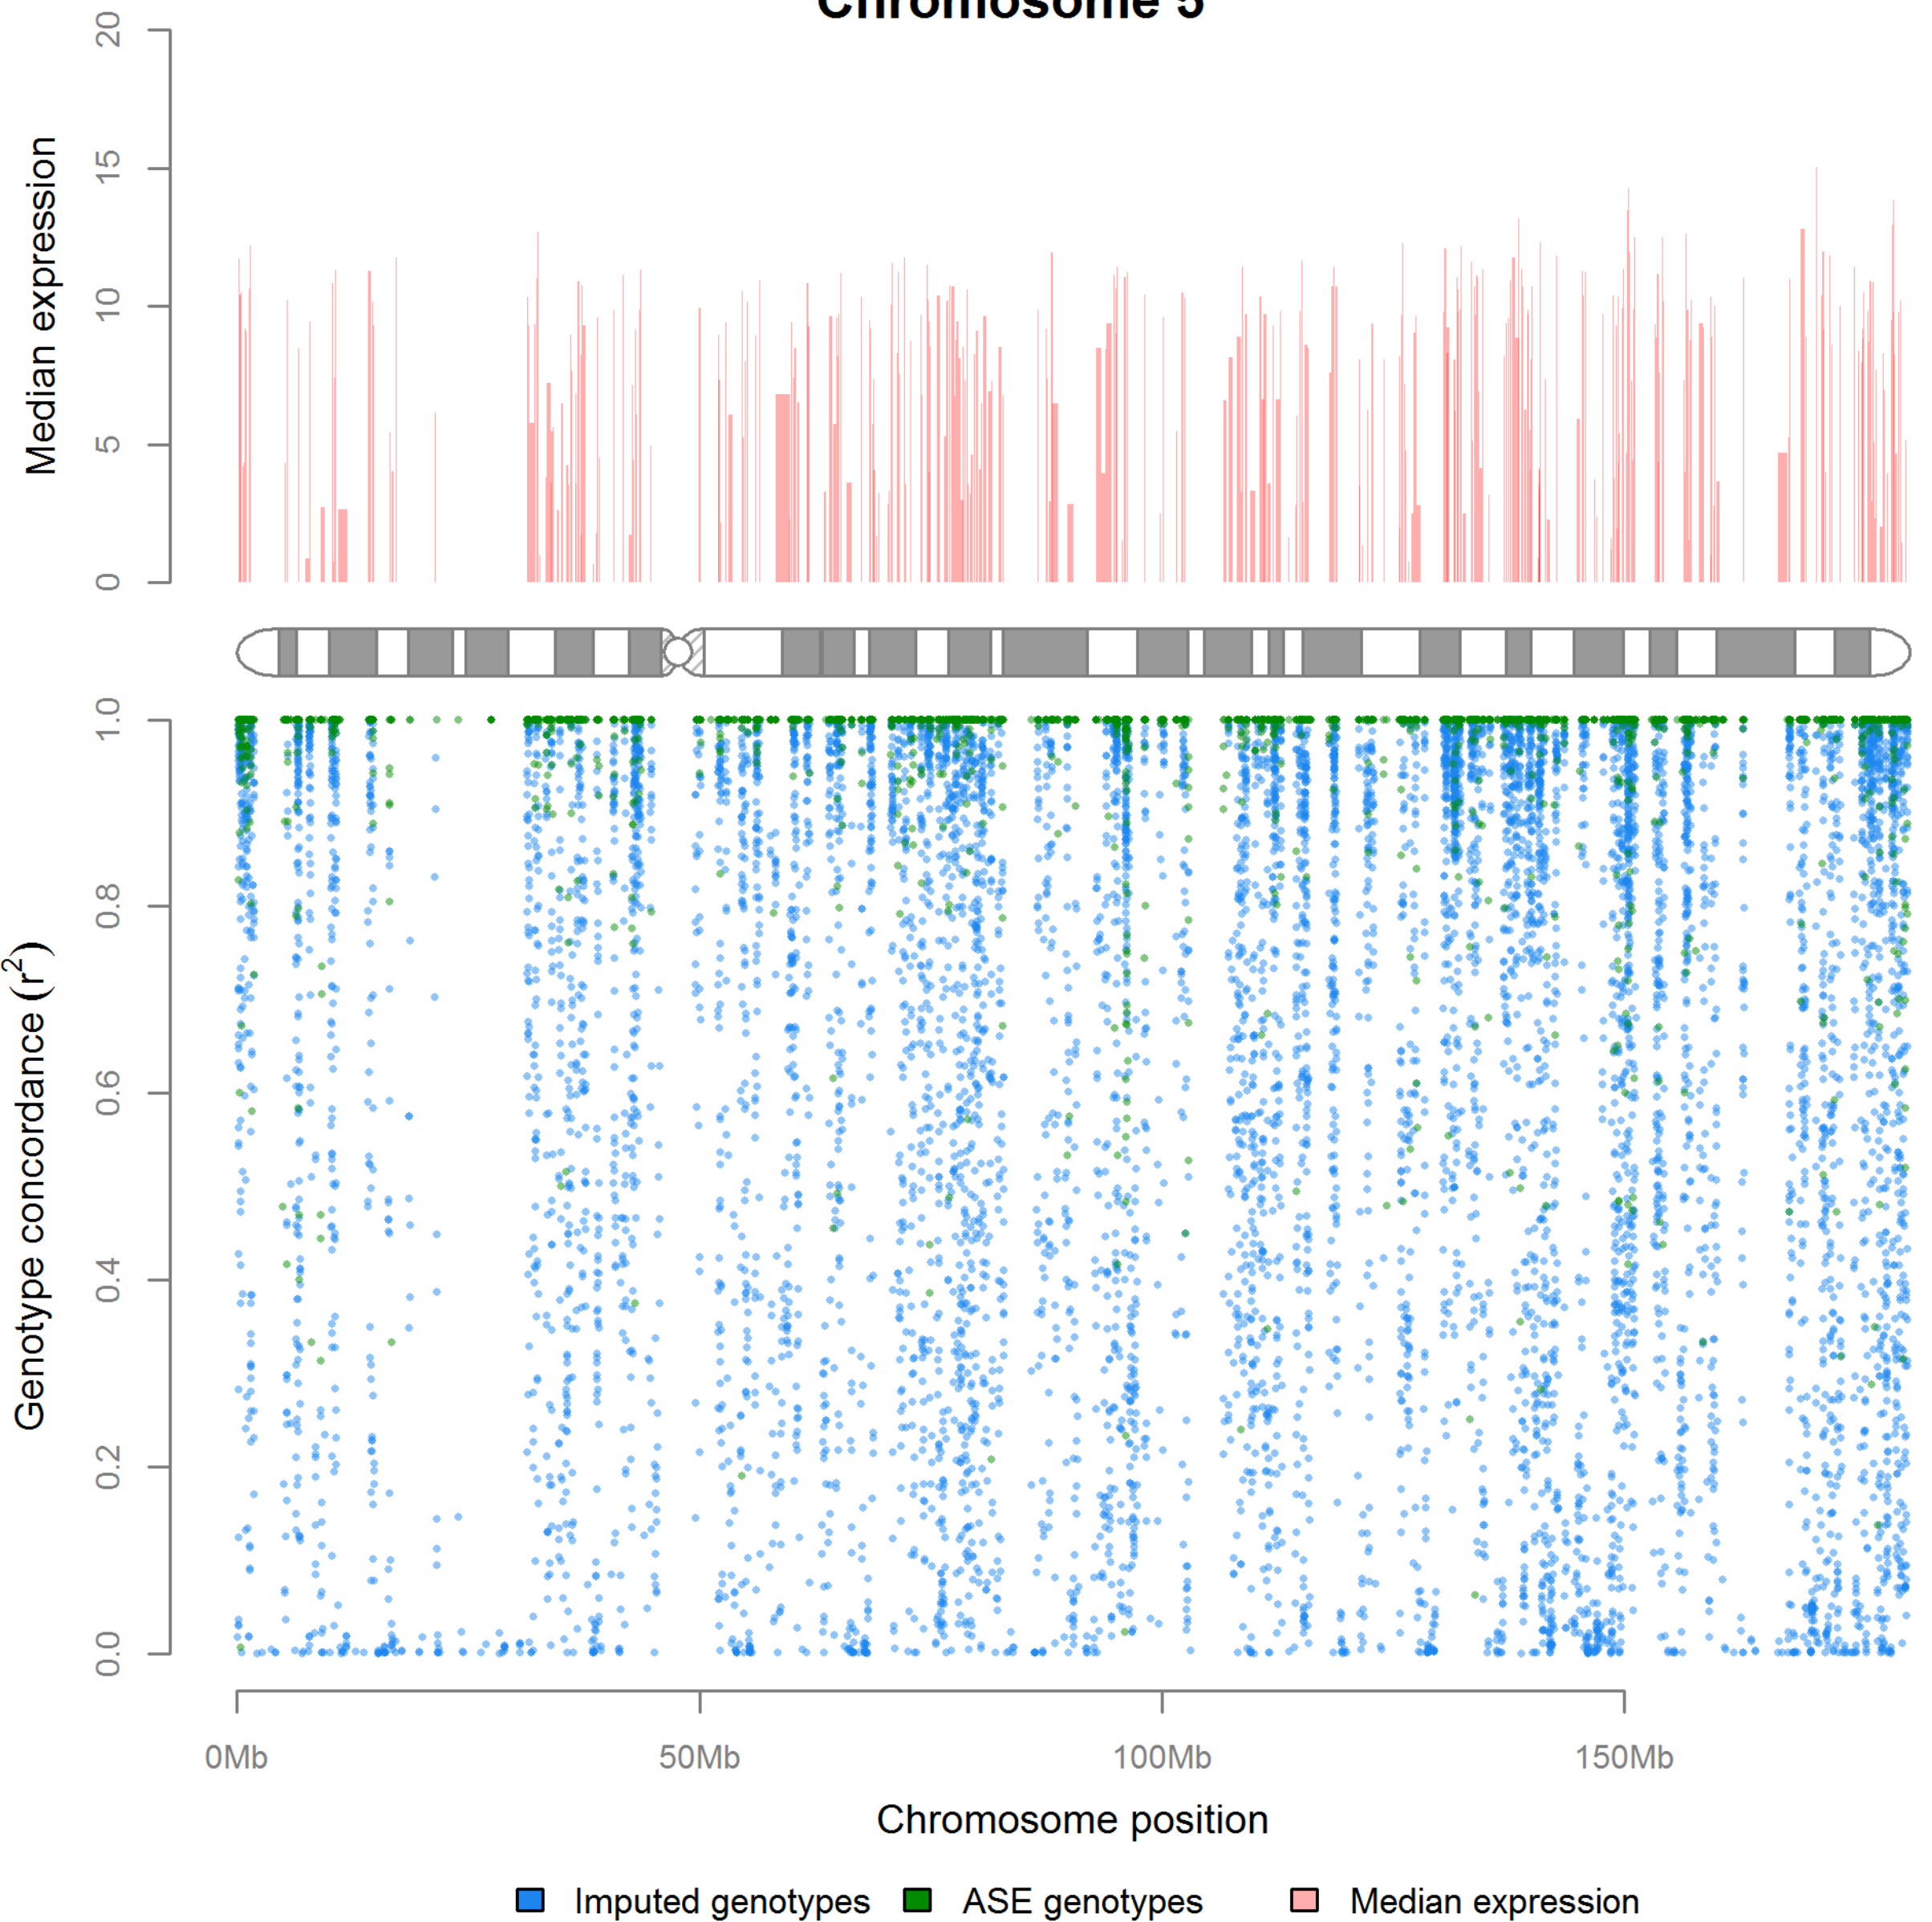

# Chromosome 6

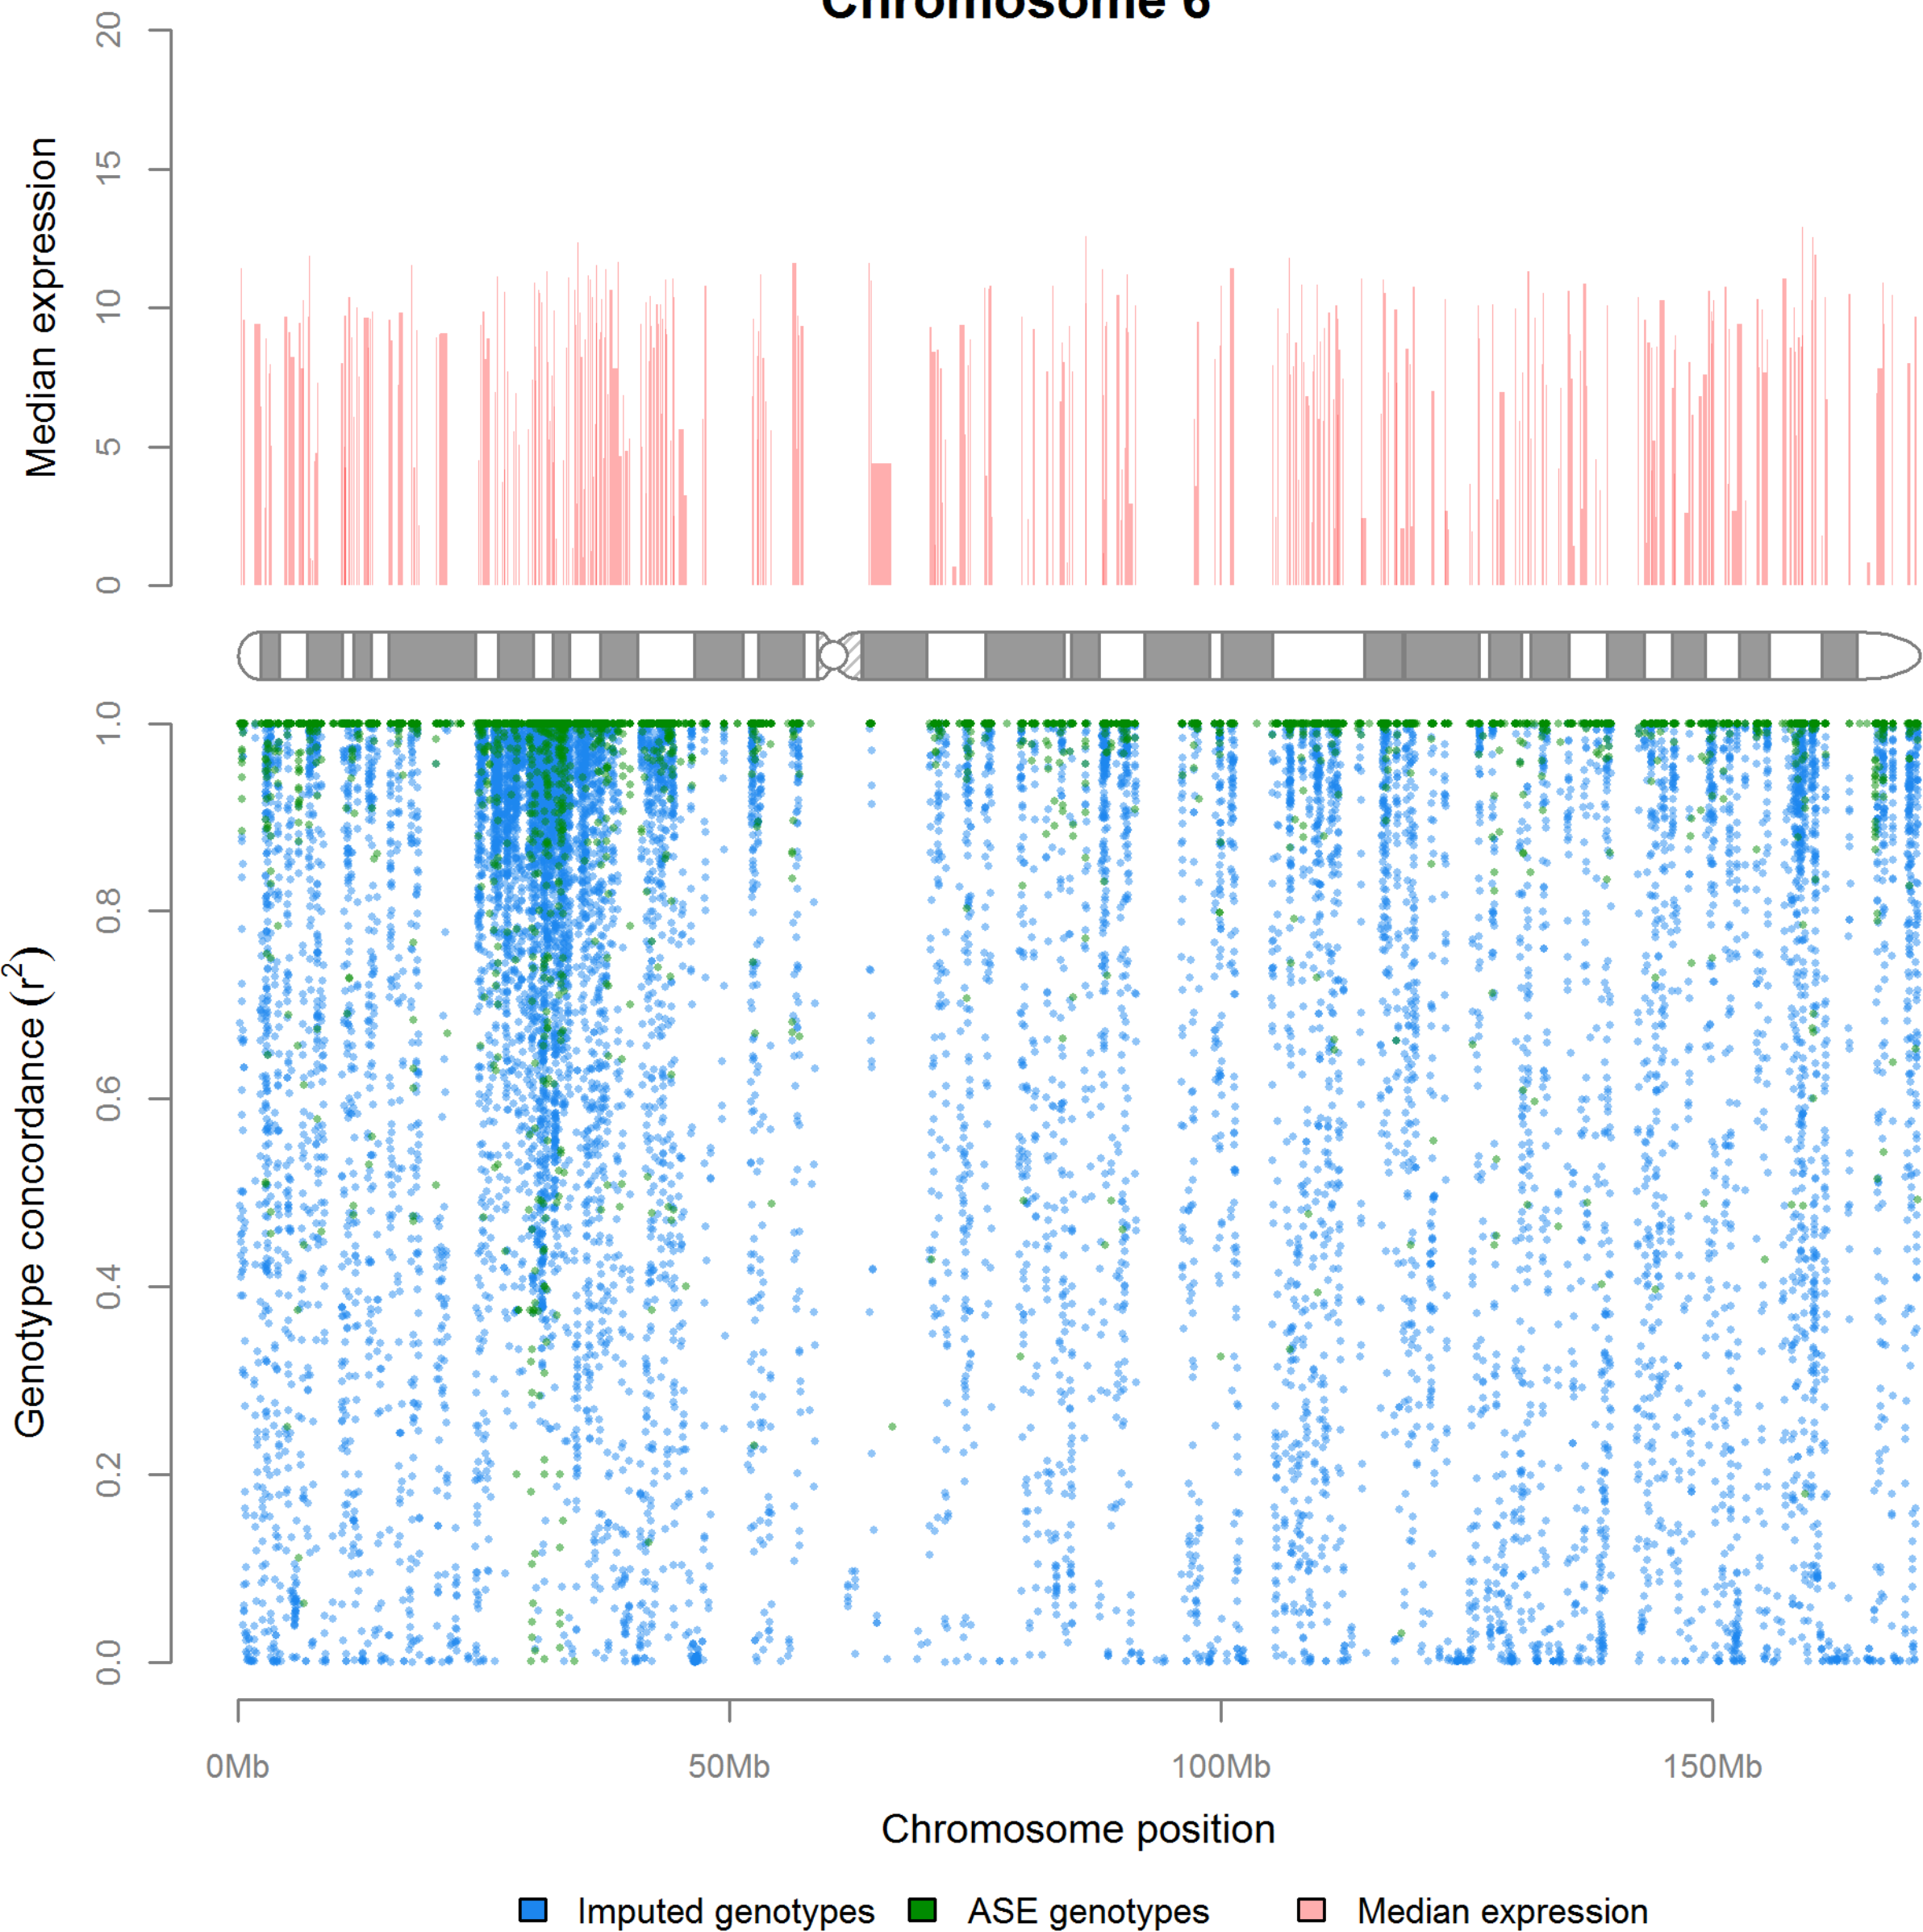

# Chromosome 7

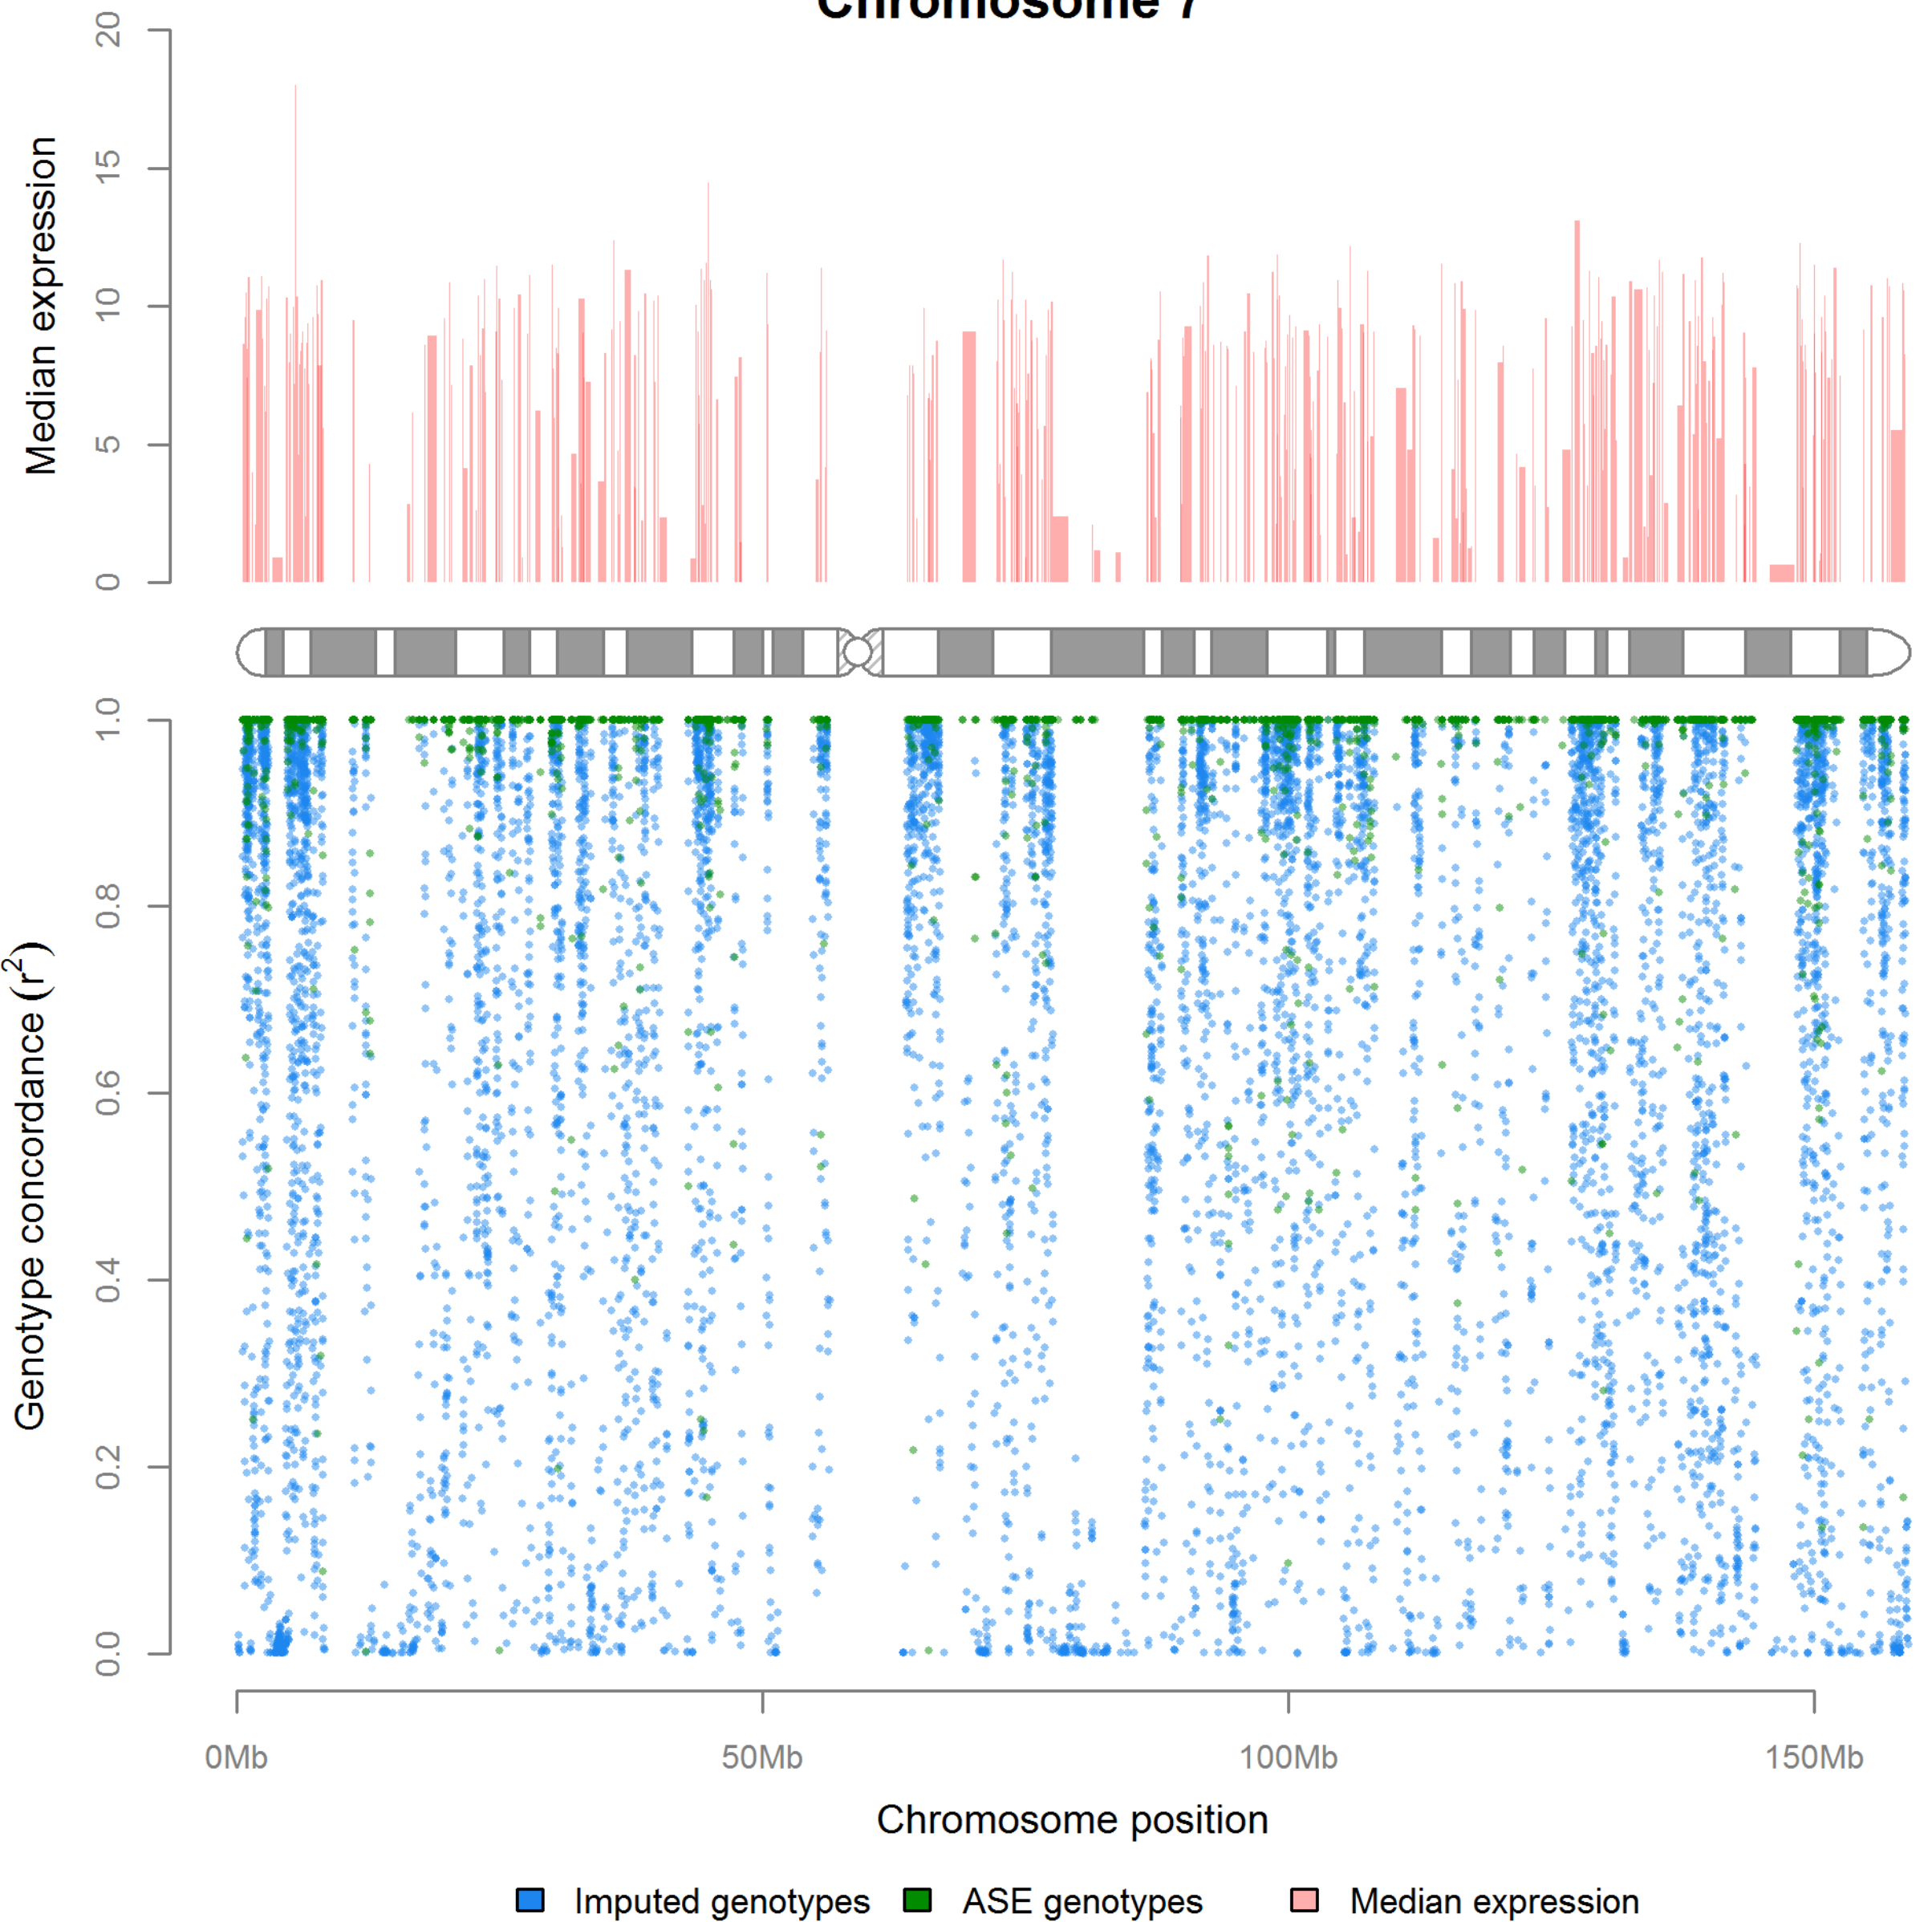

# Chromosome 8

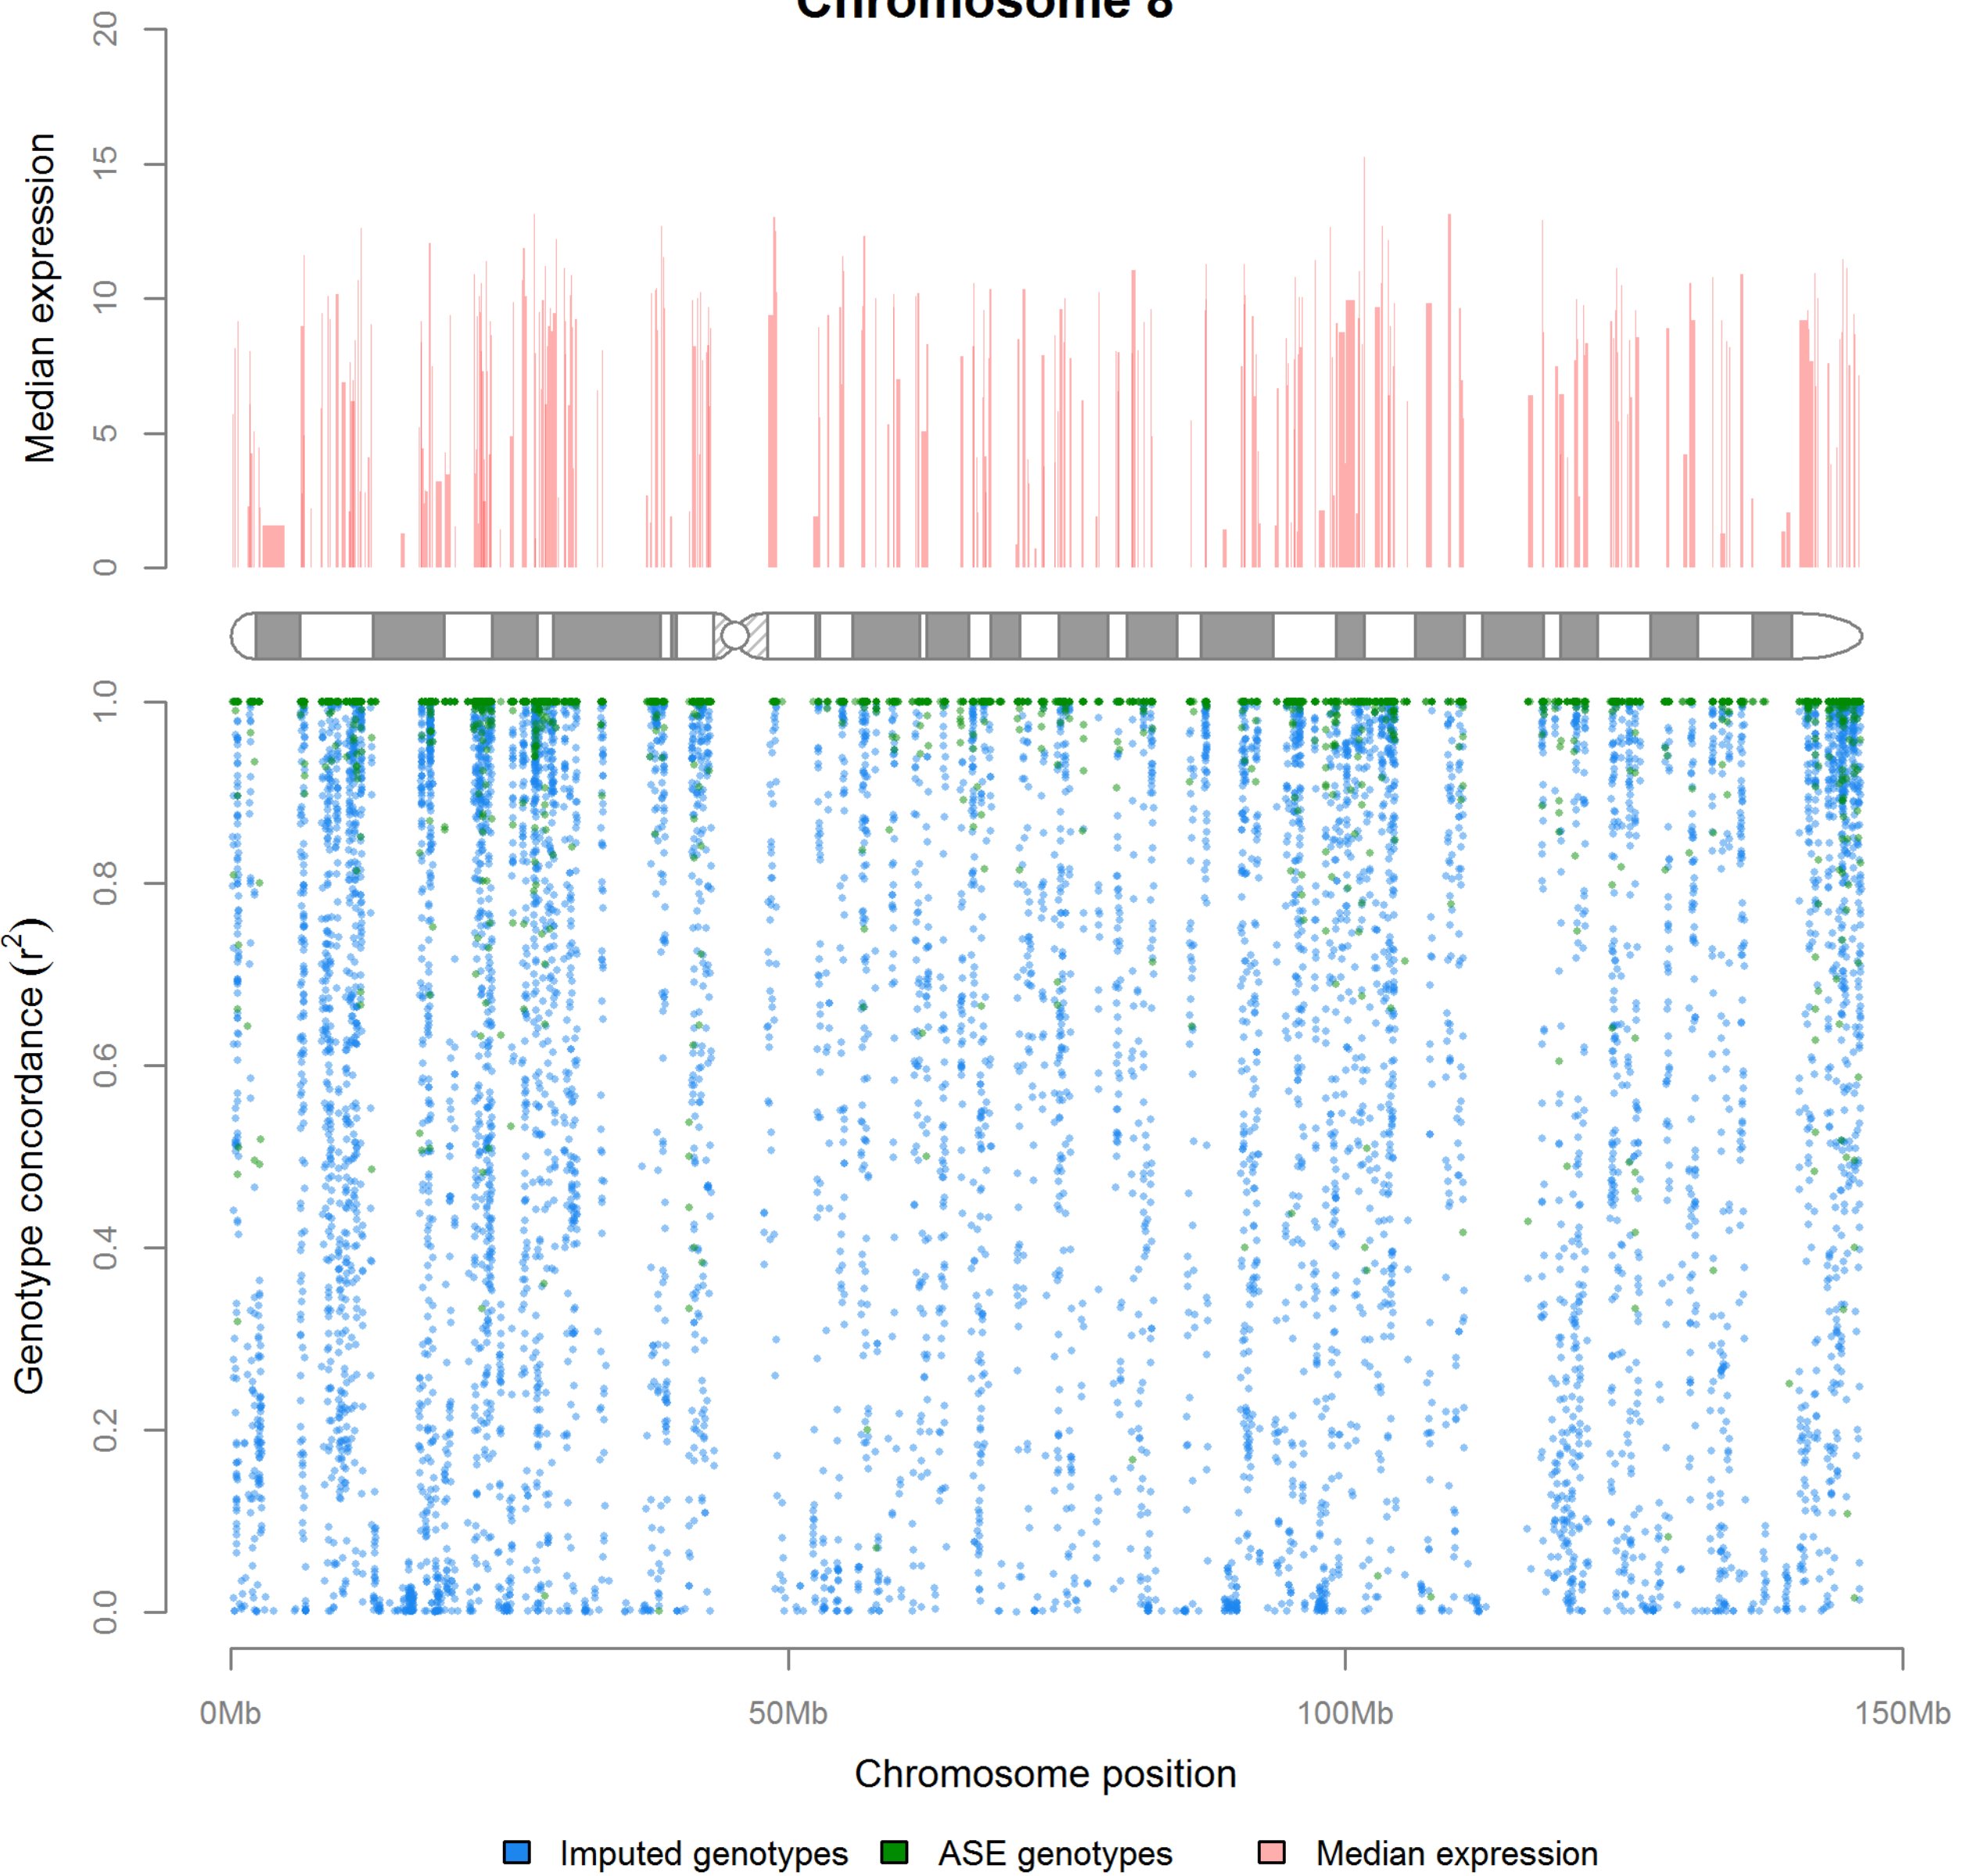



# Chromosome 9

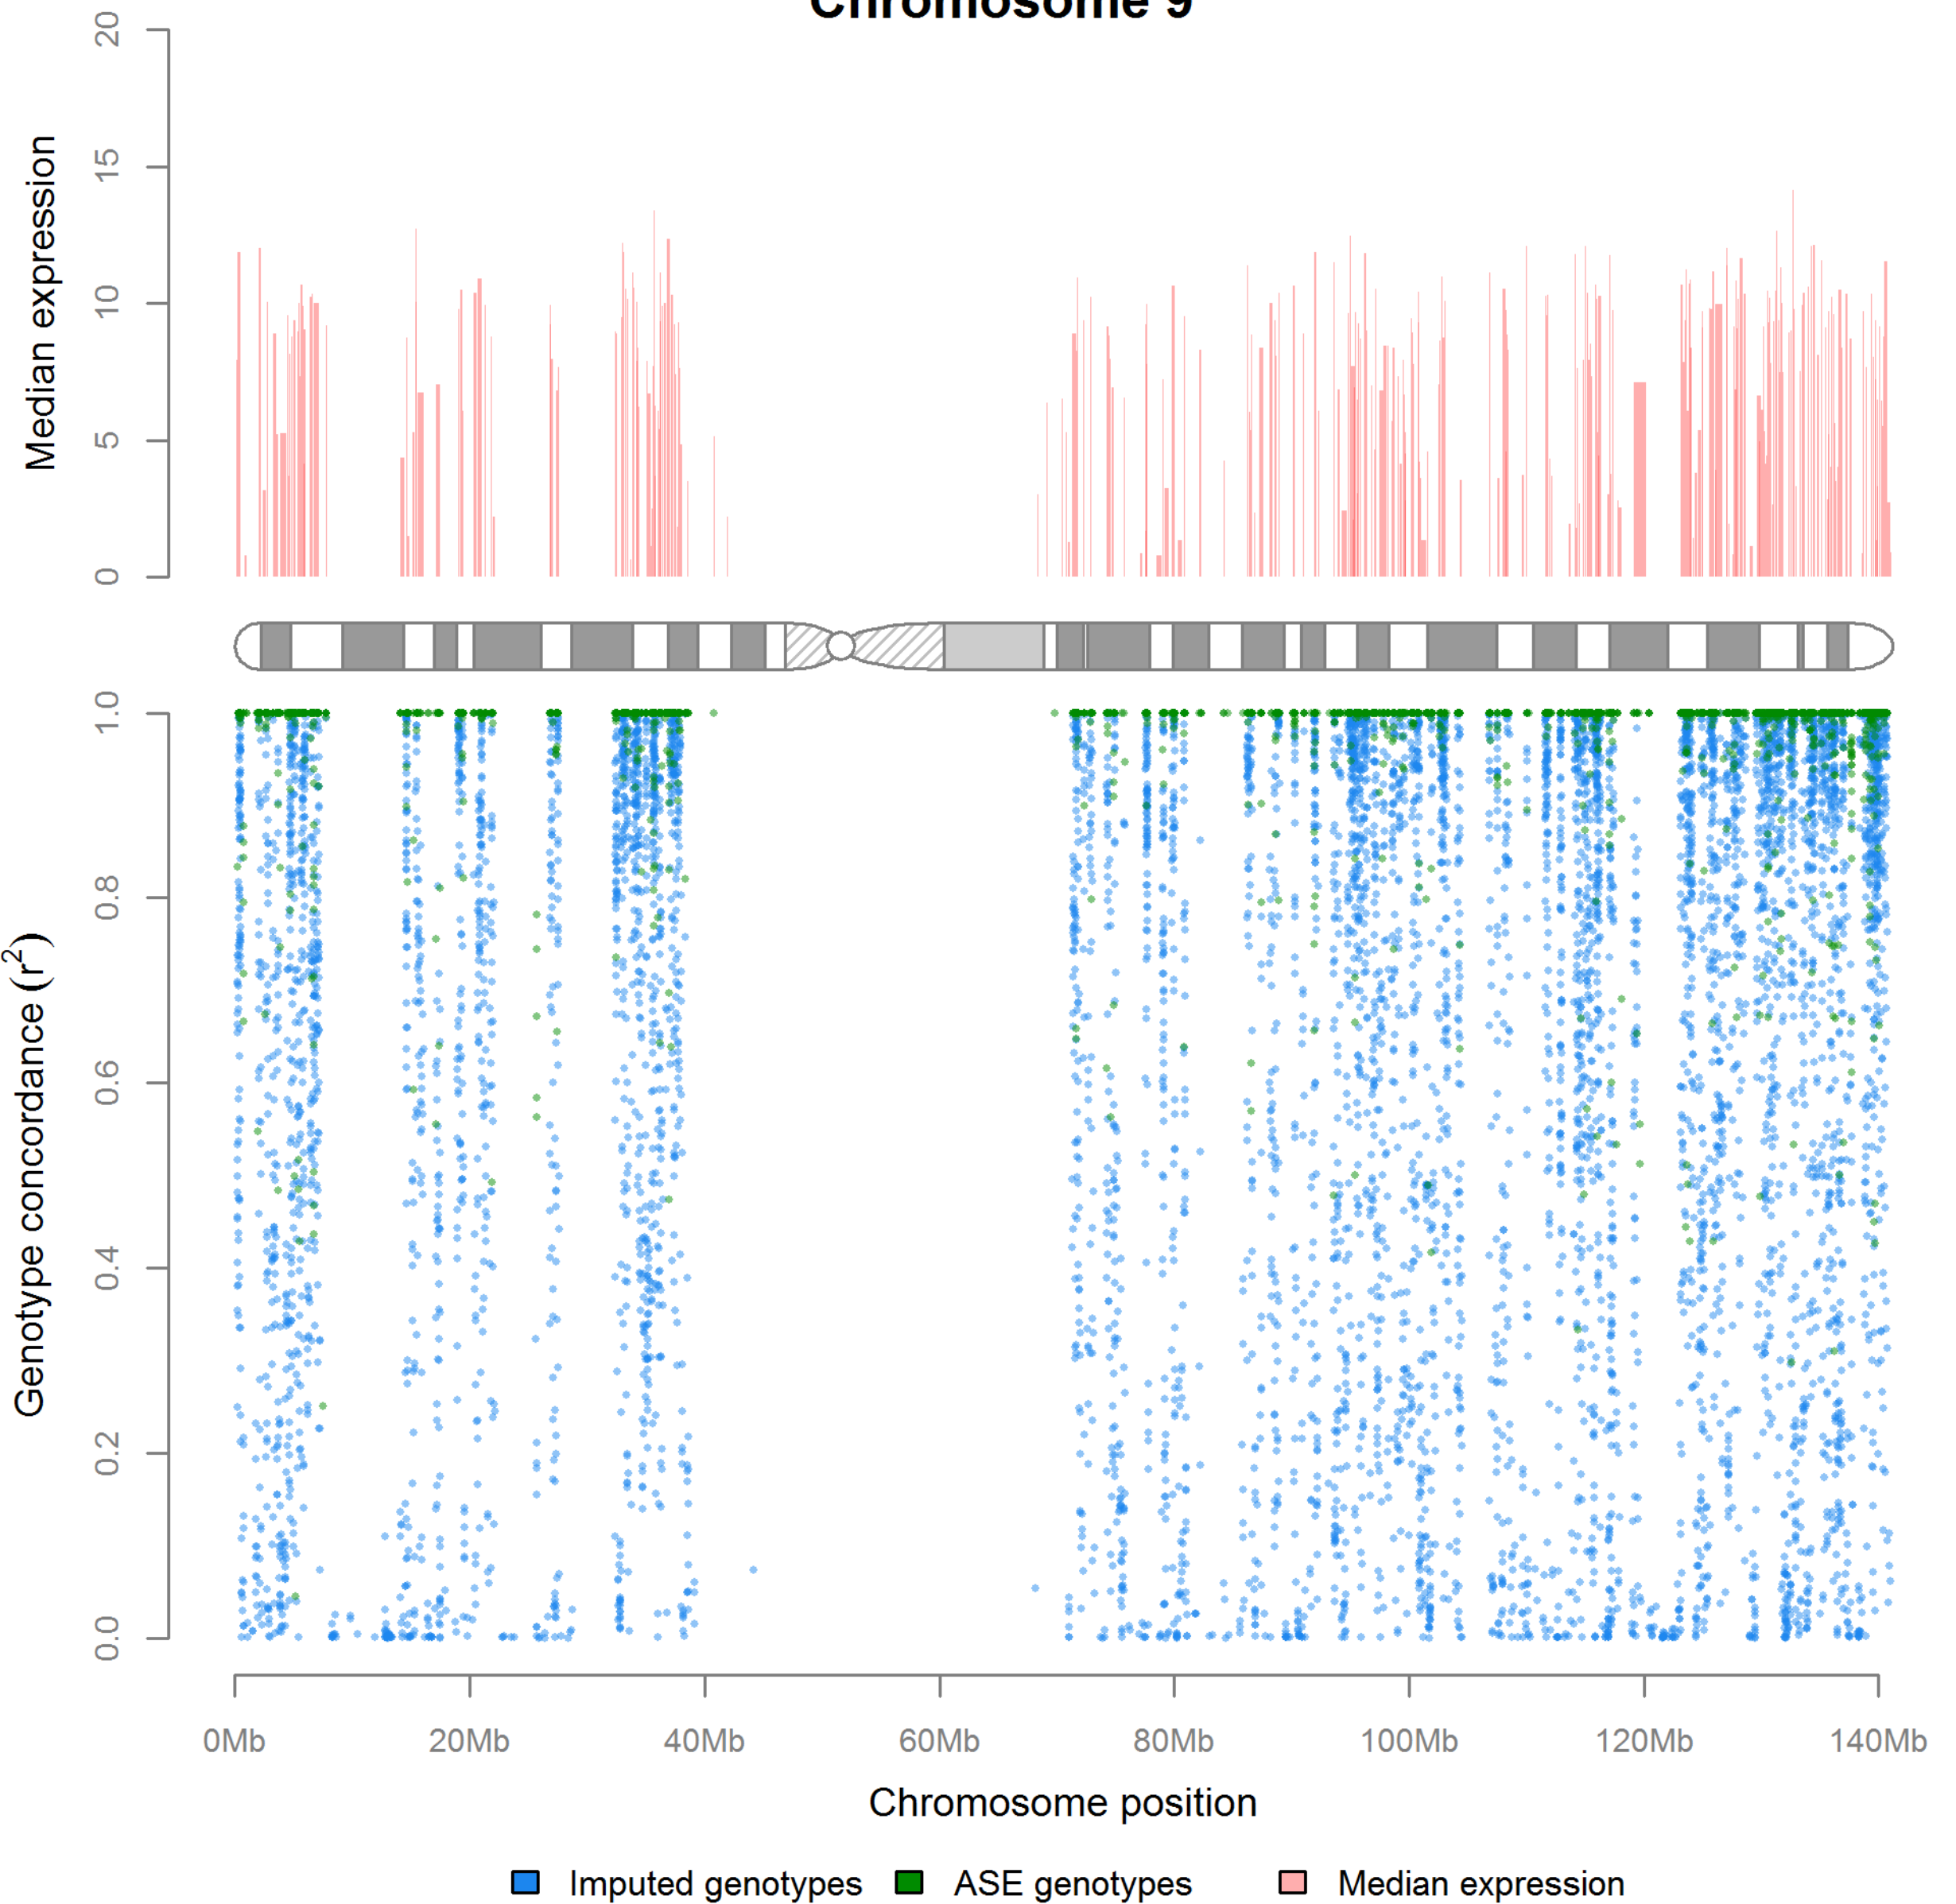

# Chromosome 10

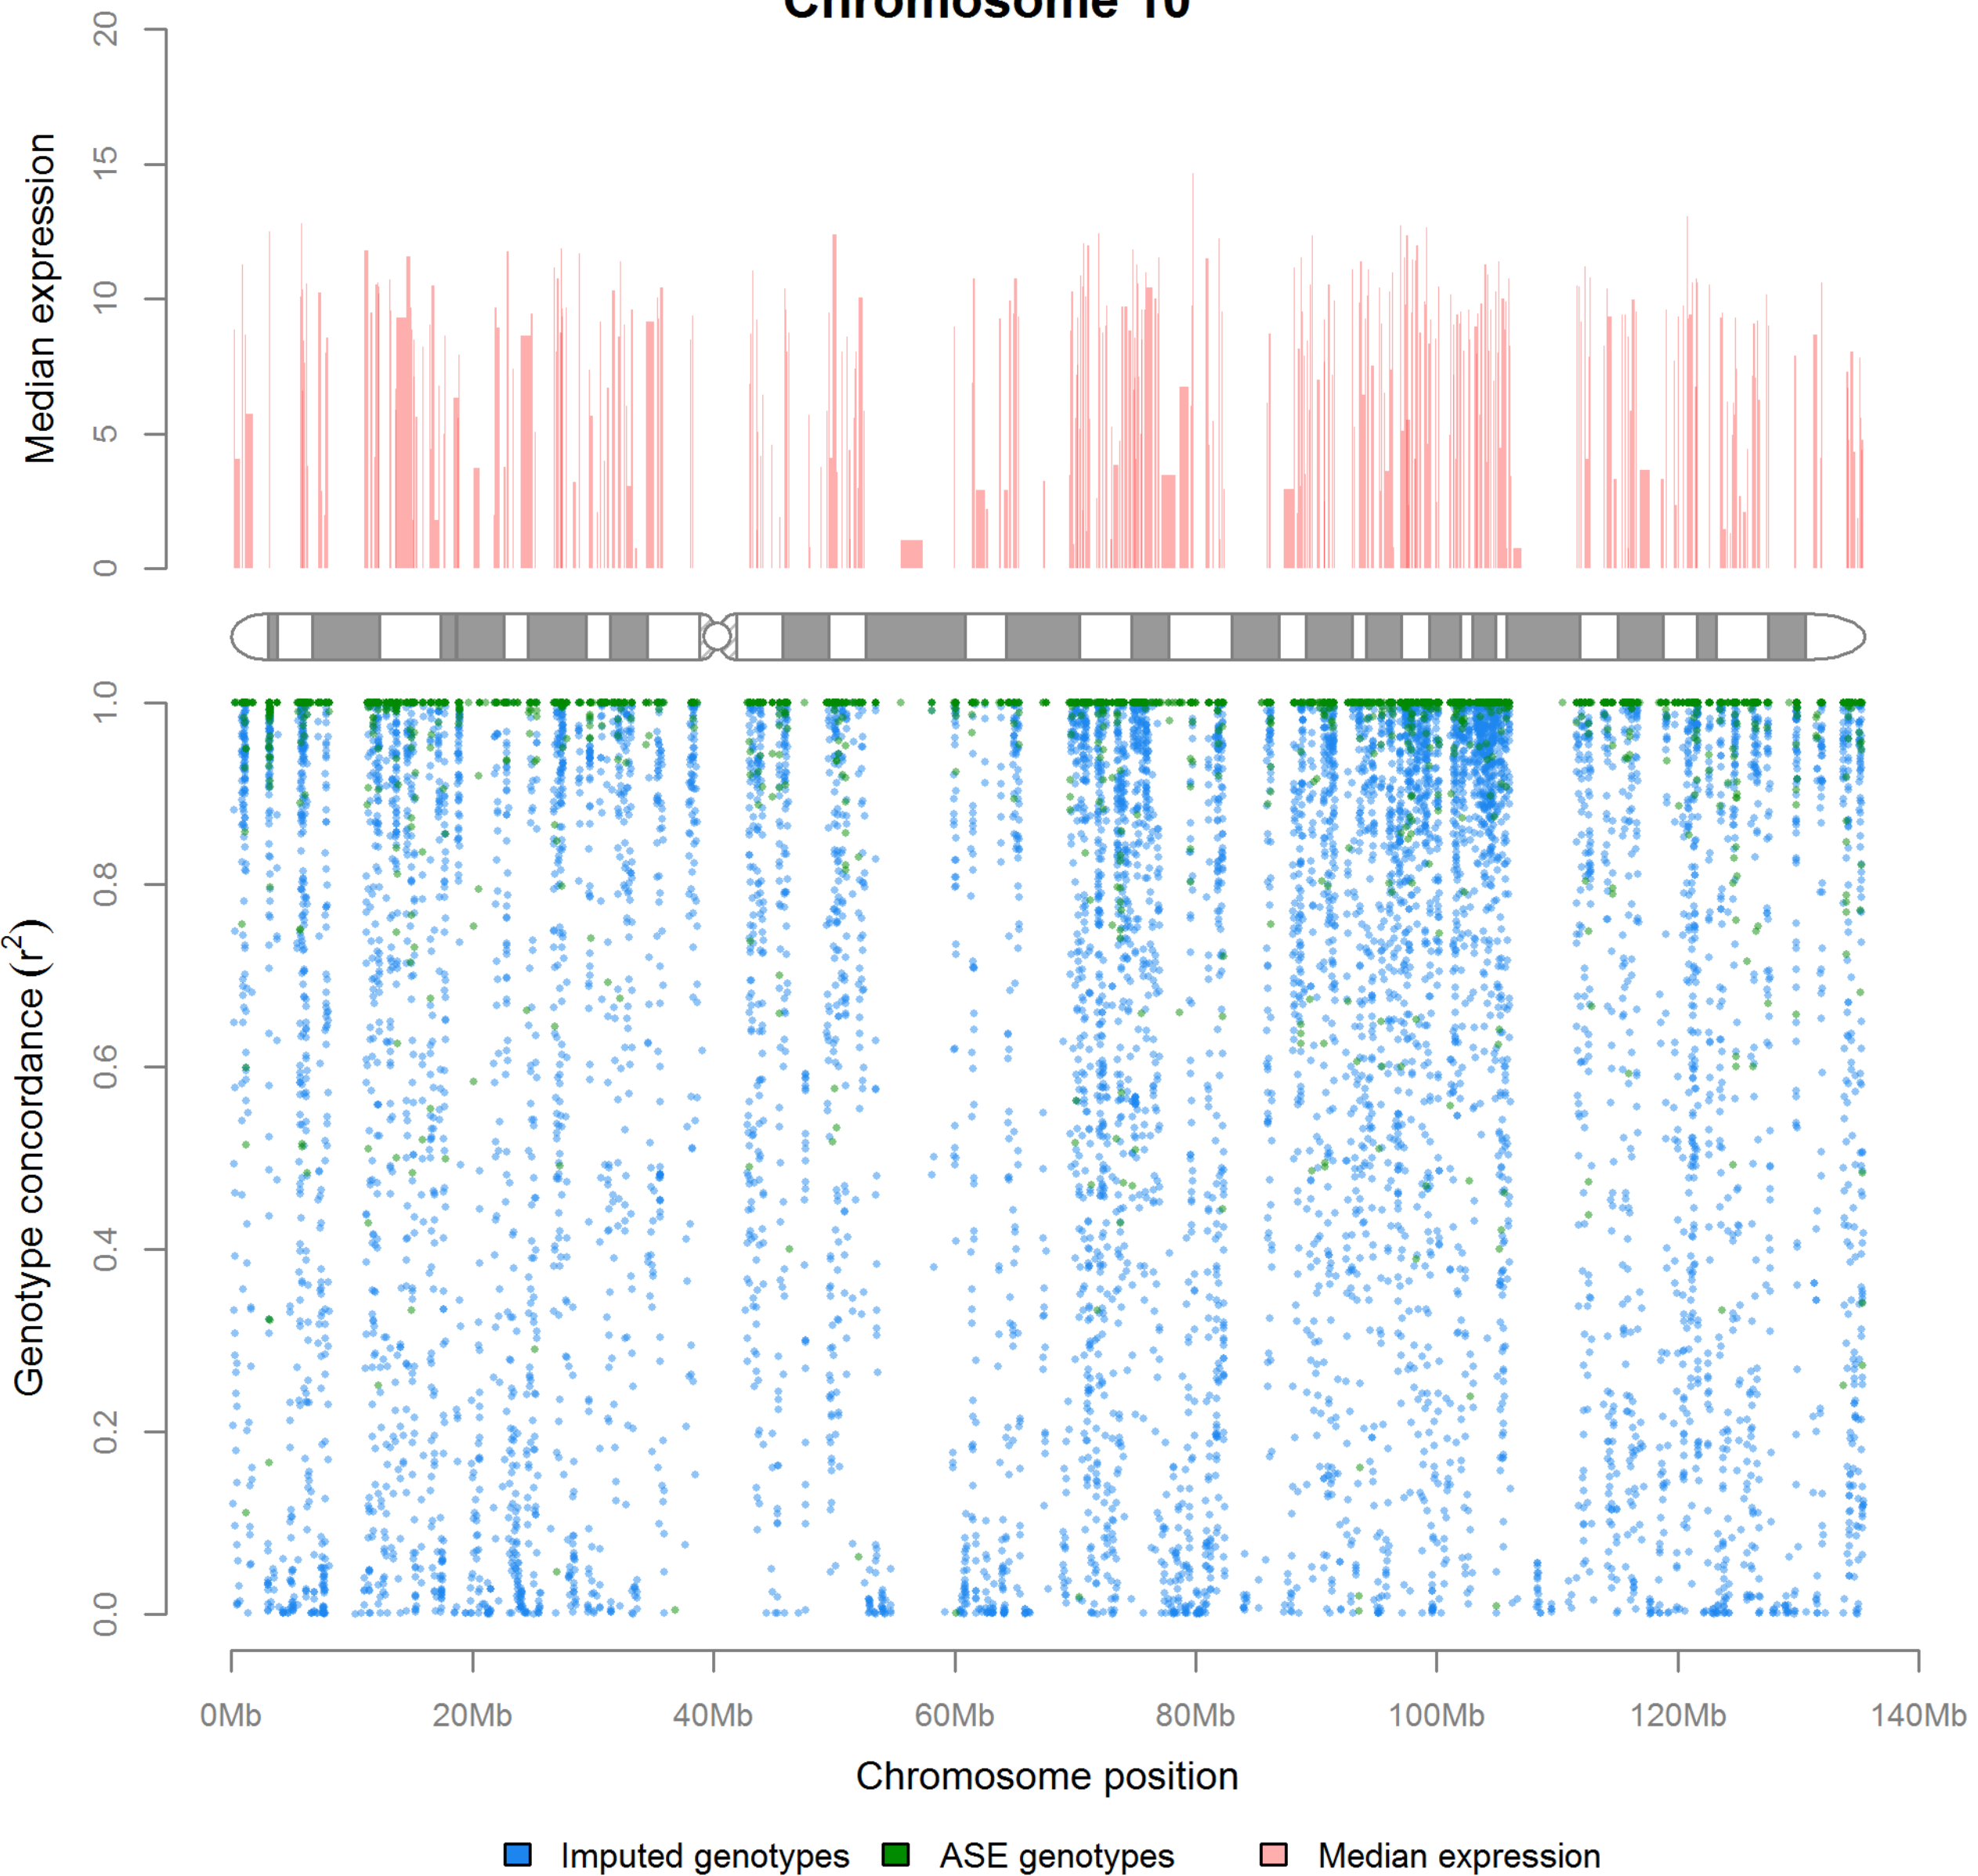

# Chromosome 11

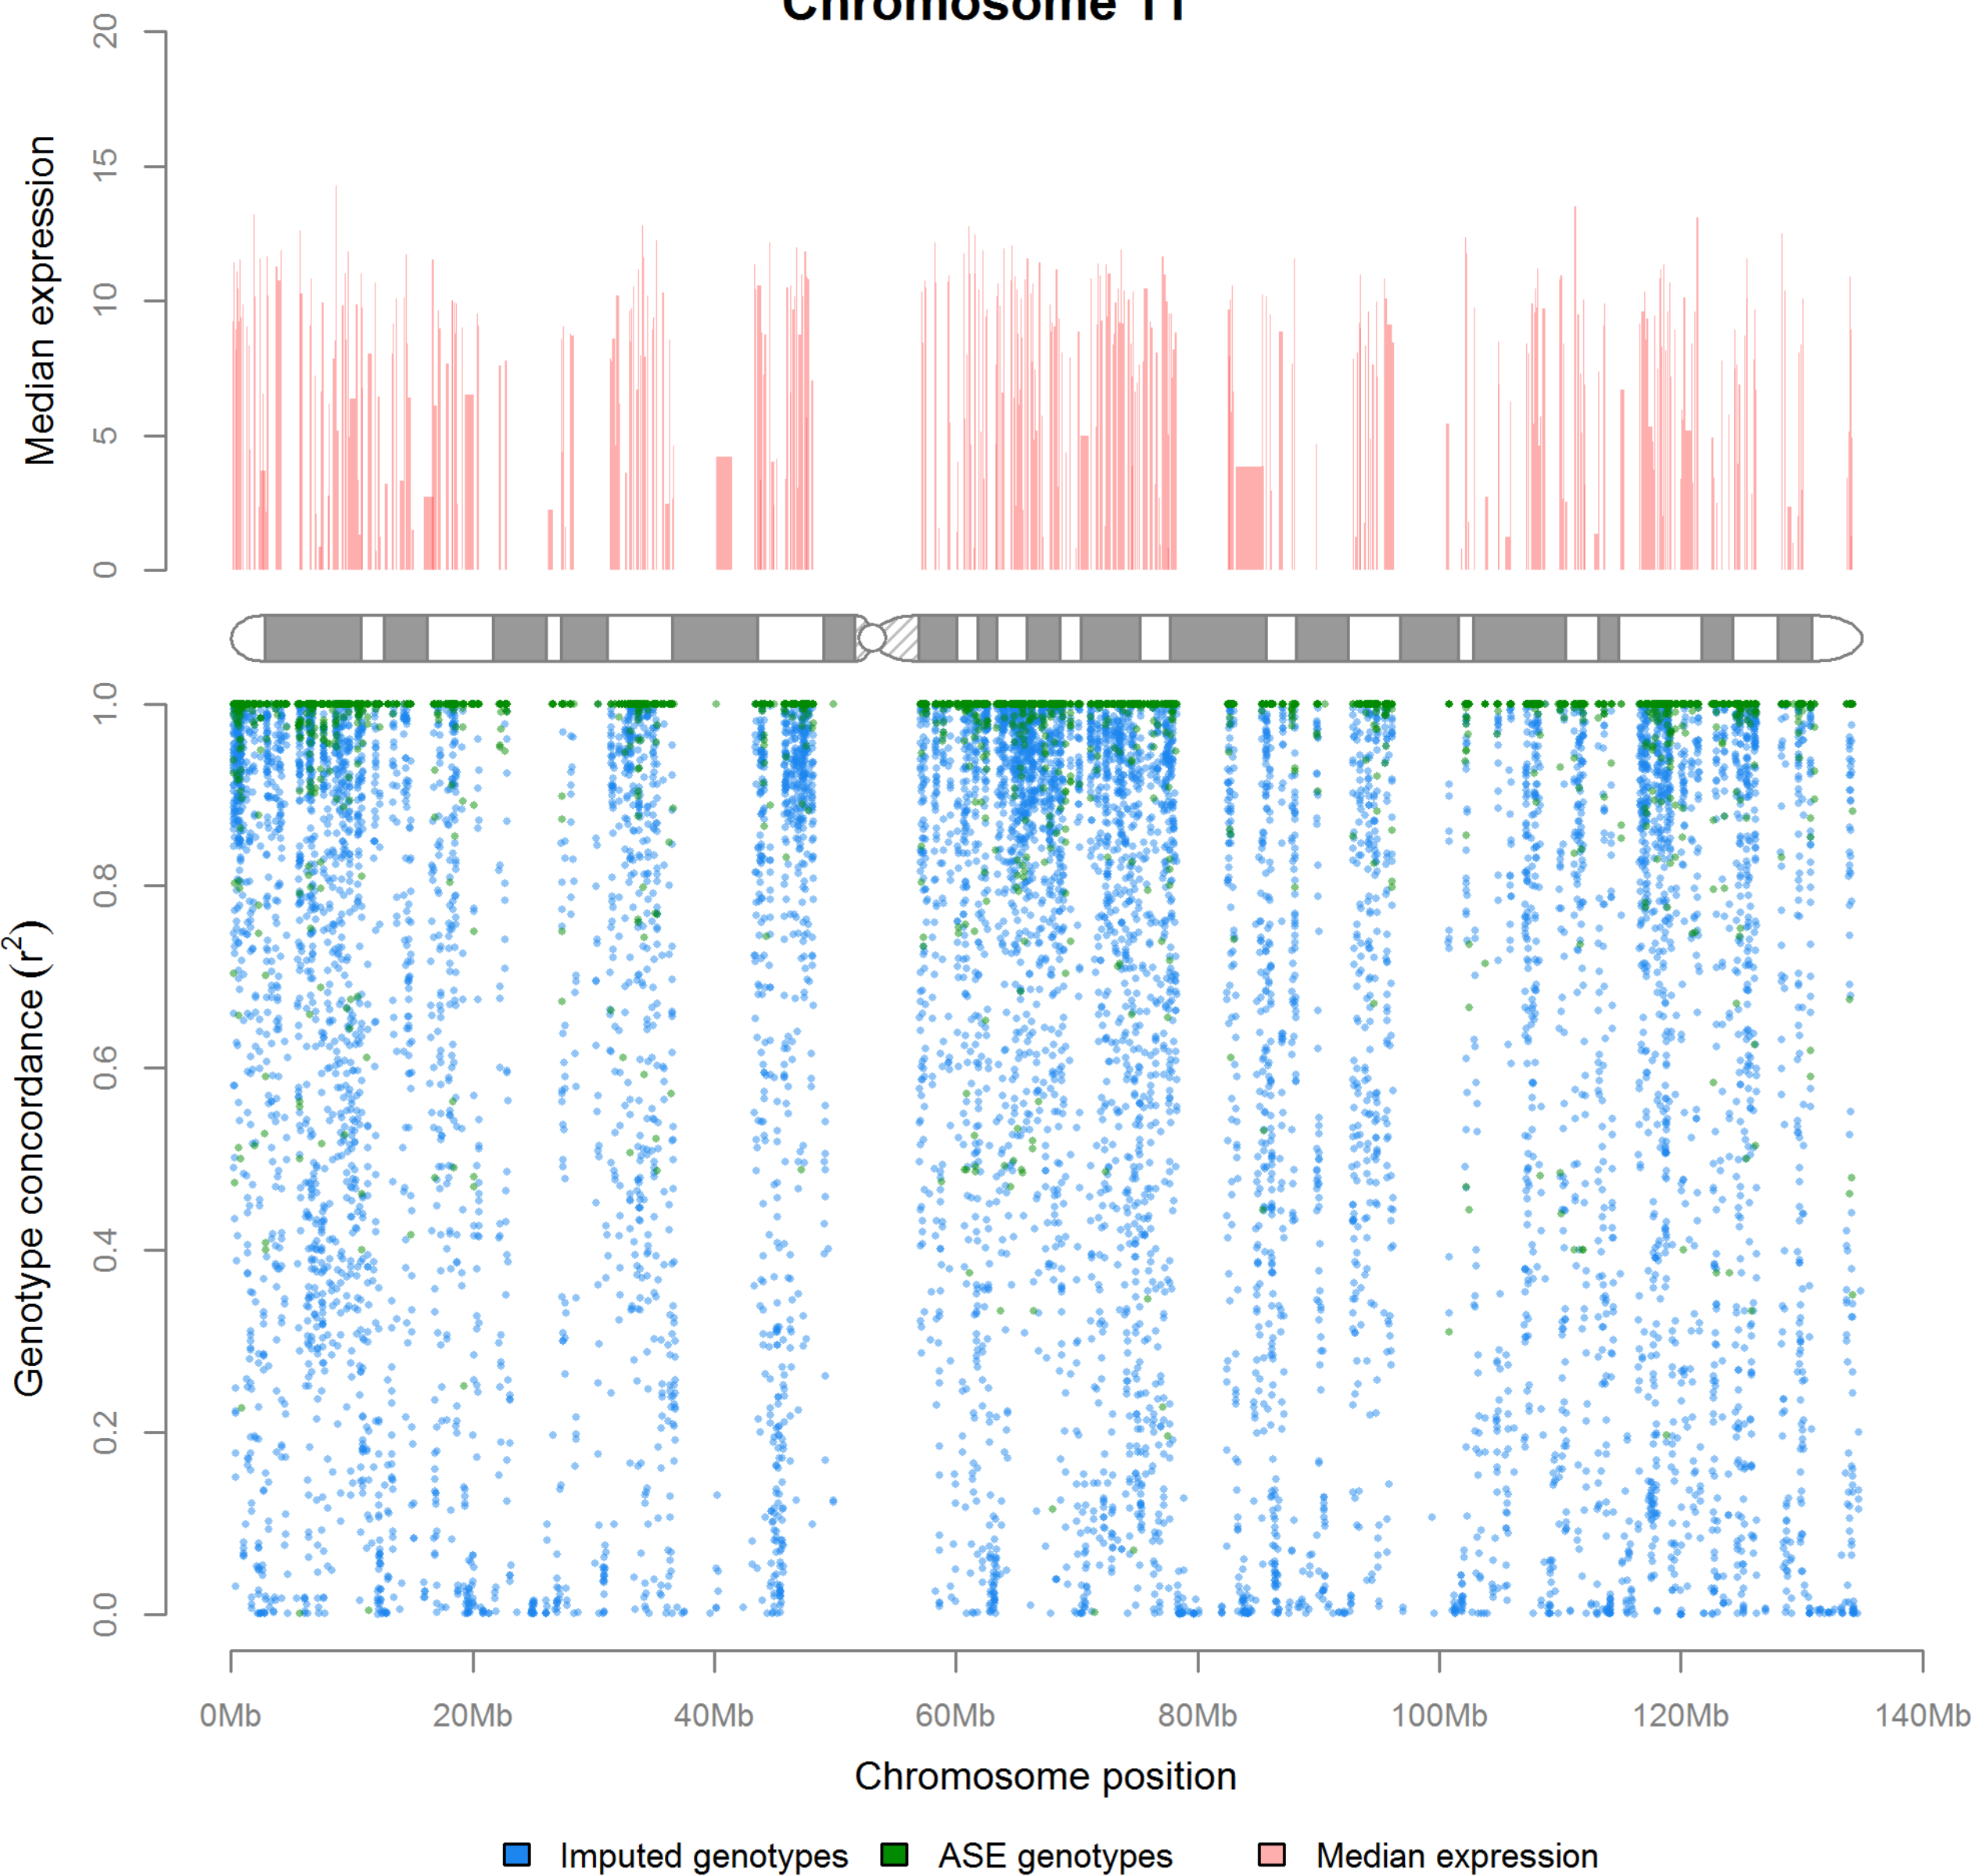

# Chromosome 12

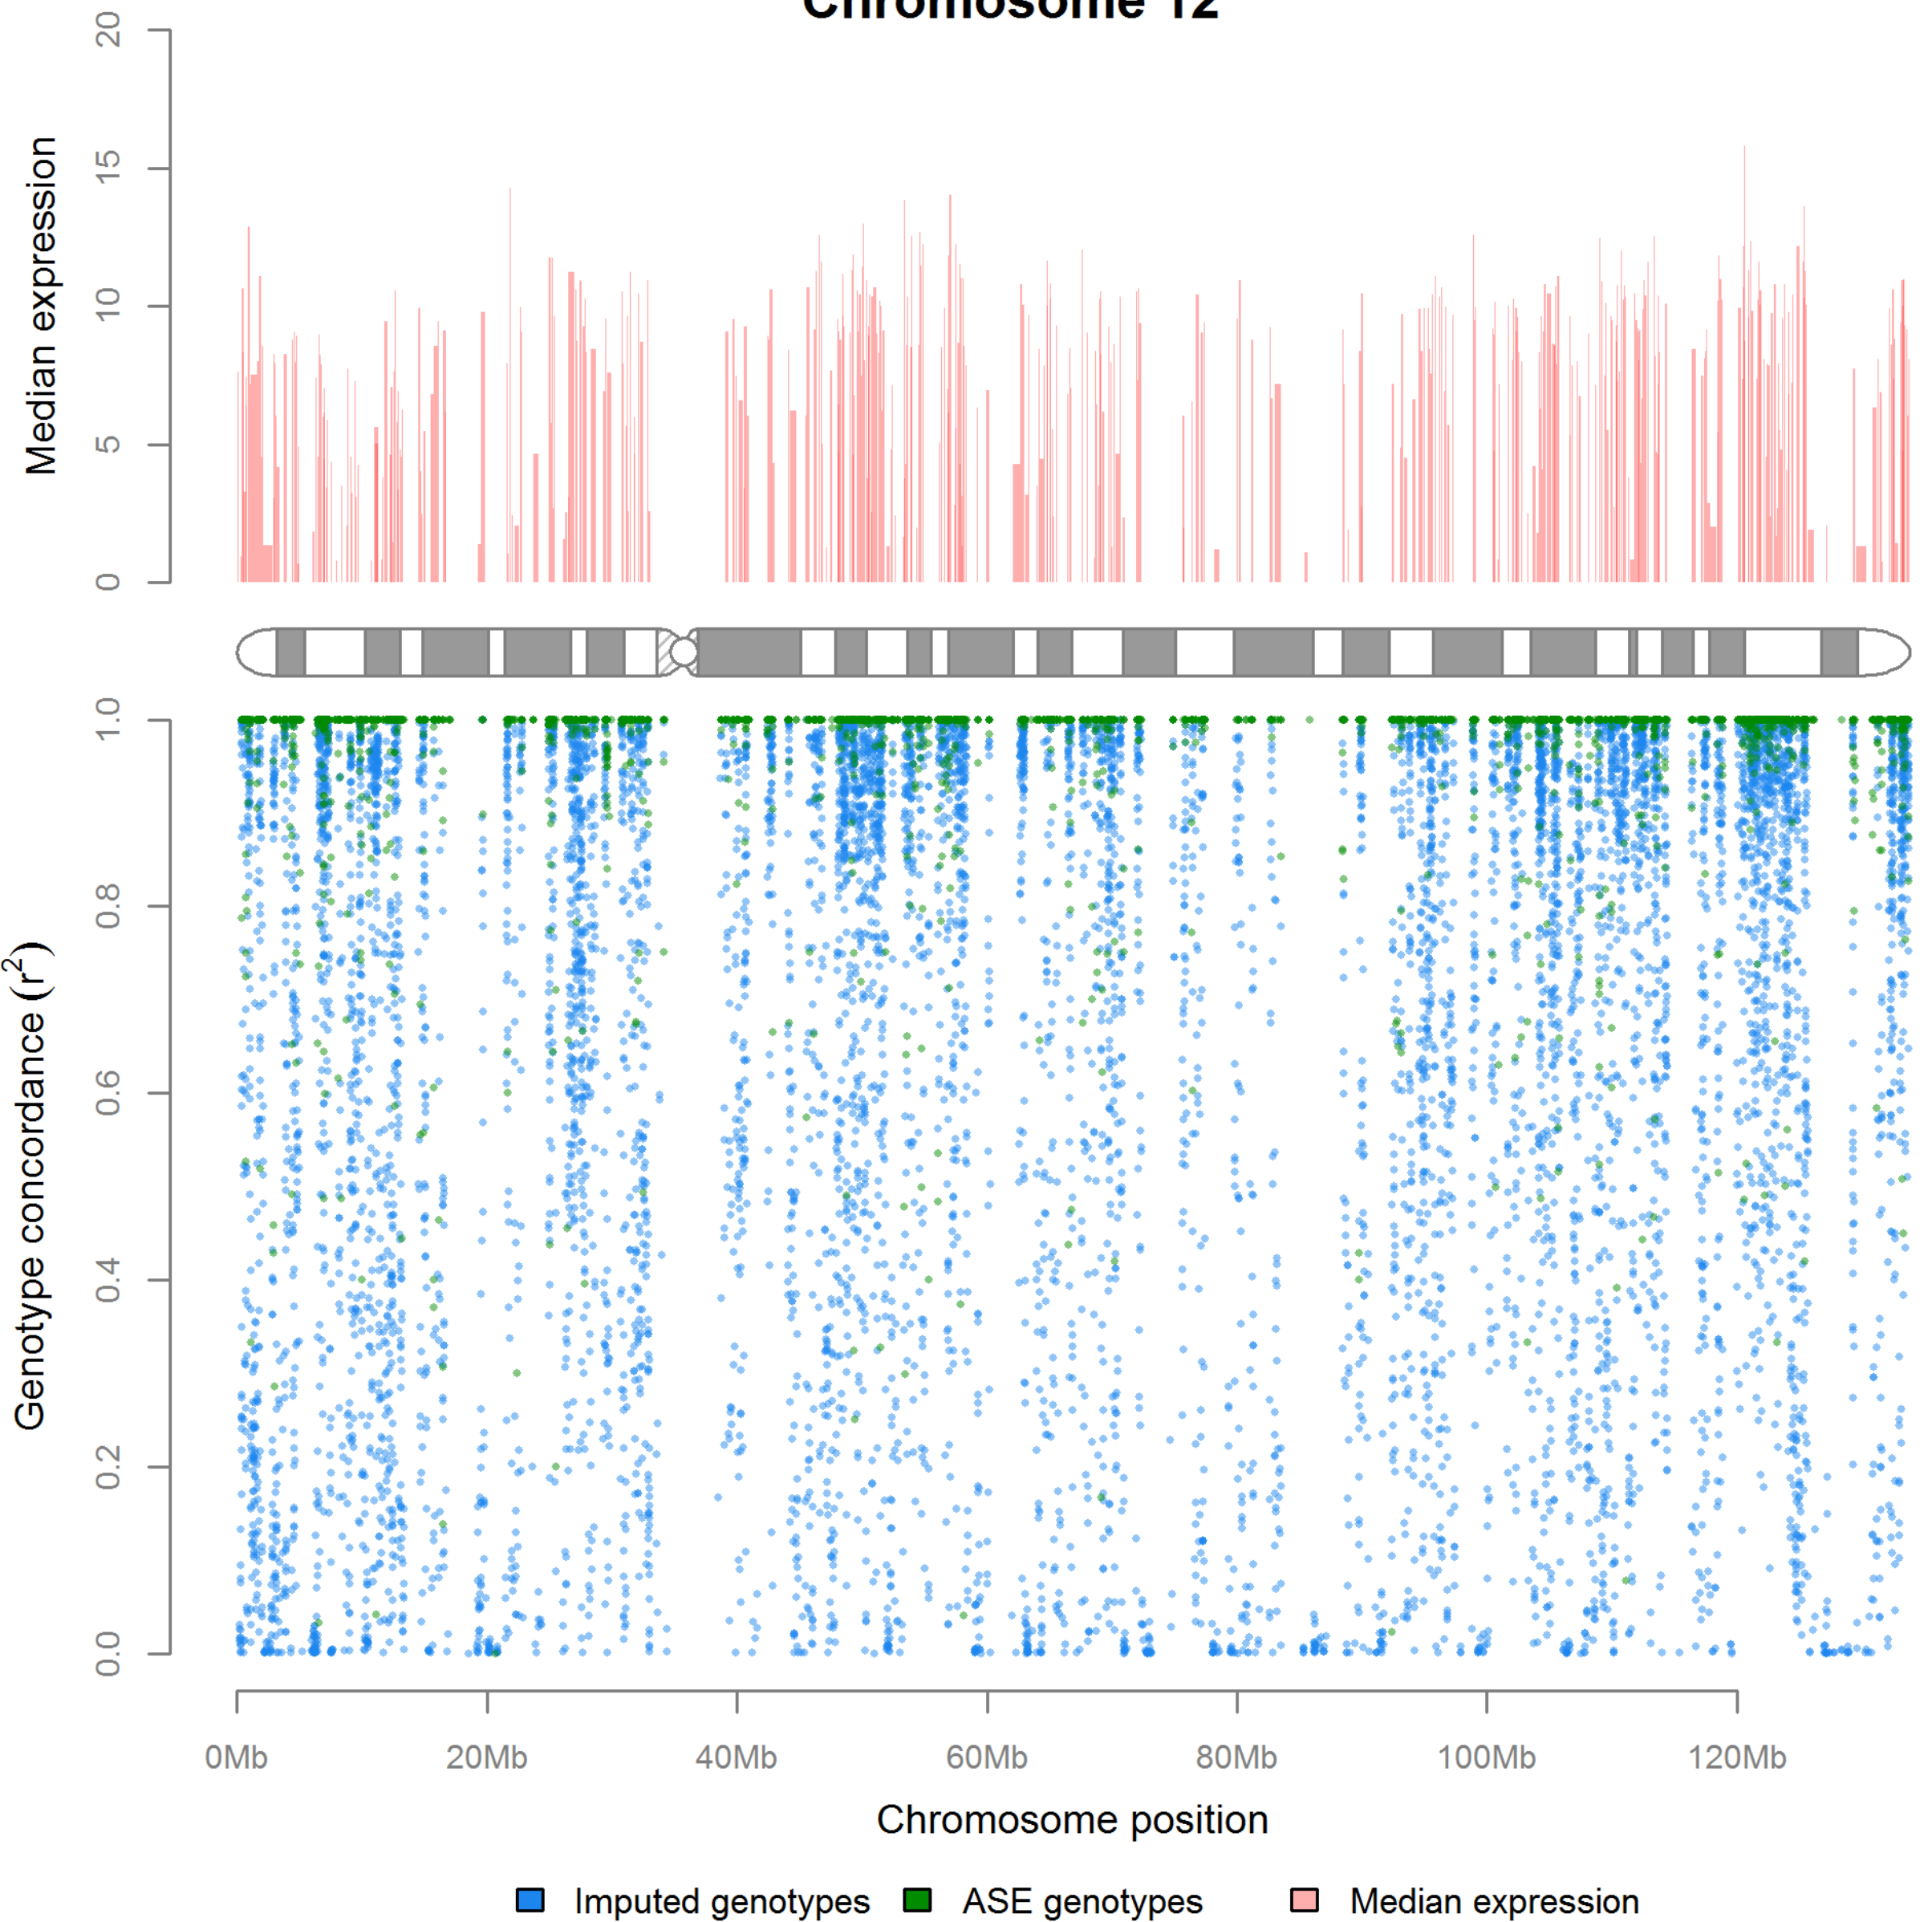

# Chromosome 13

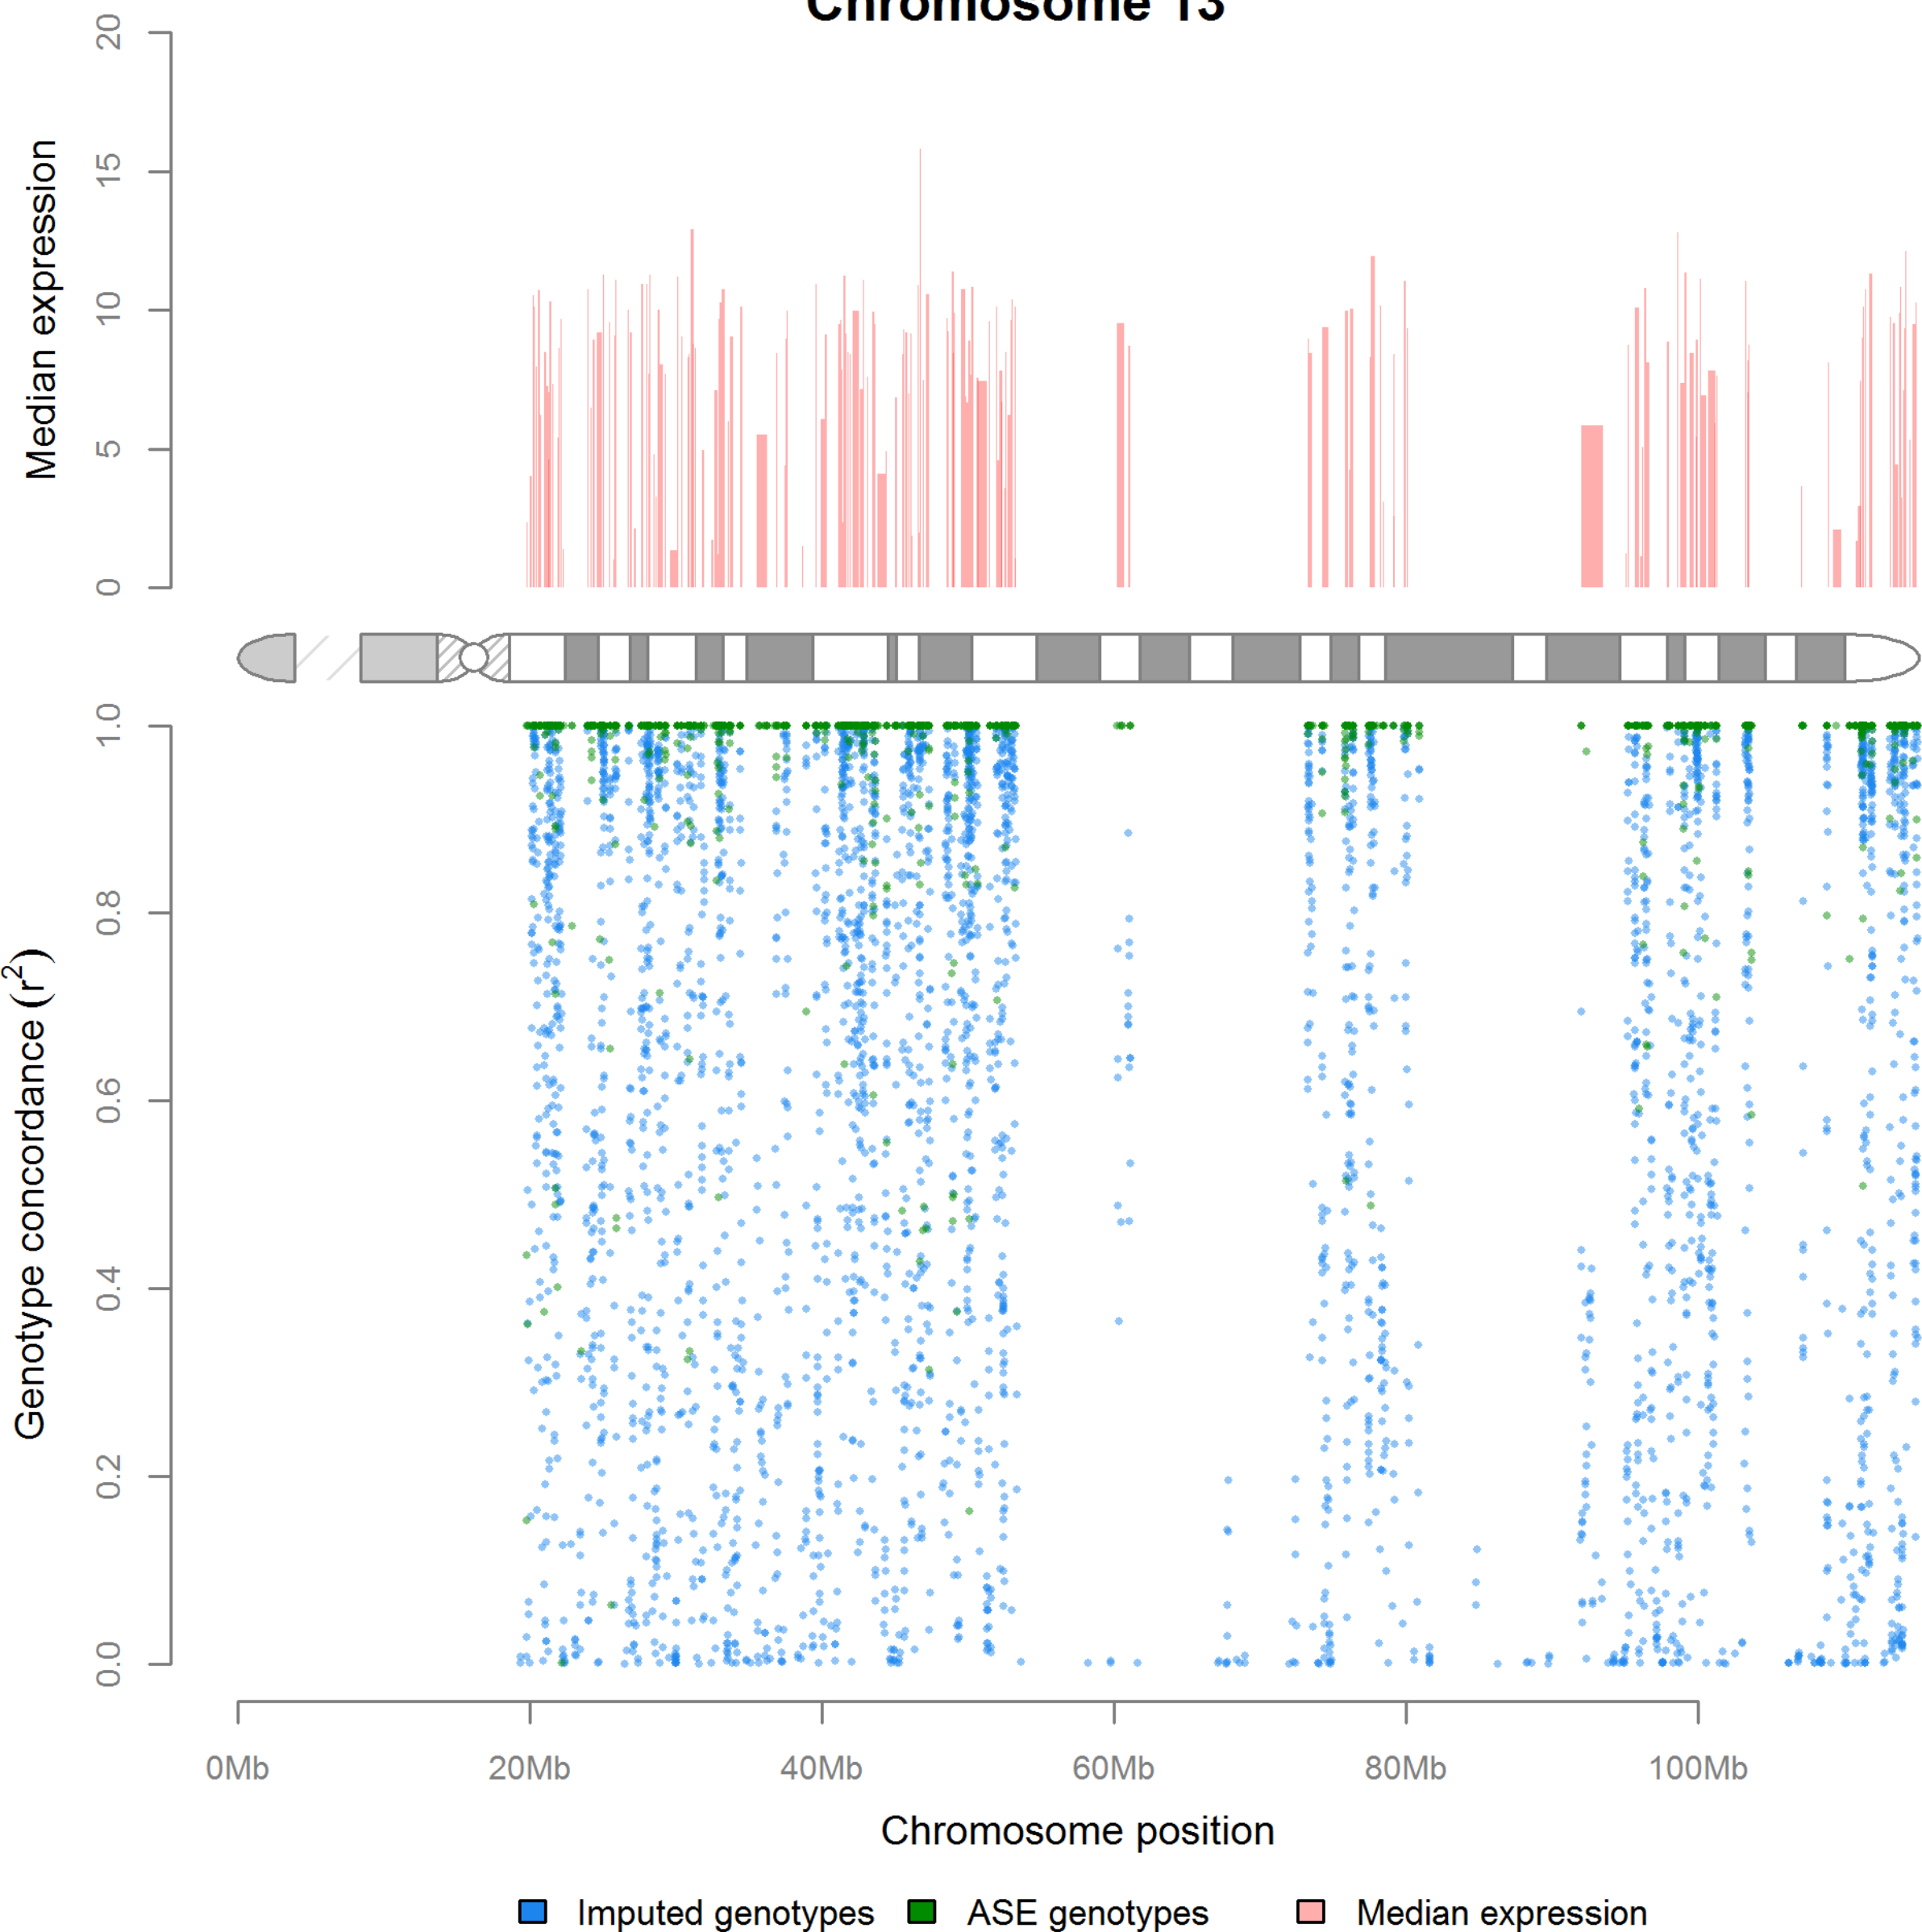

# Chromosome 14

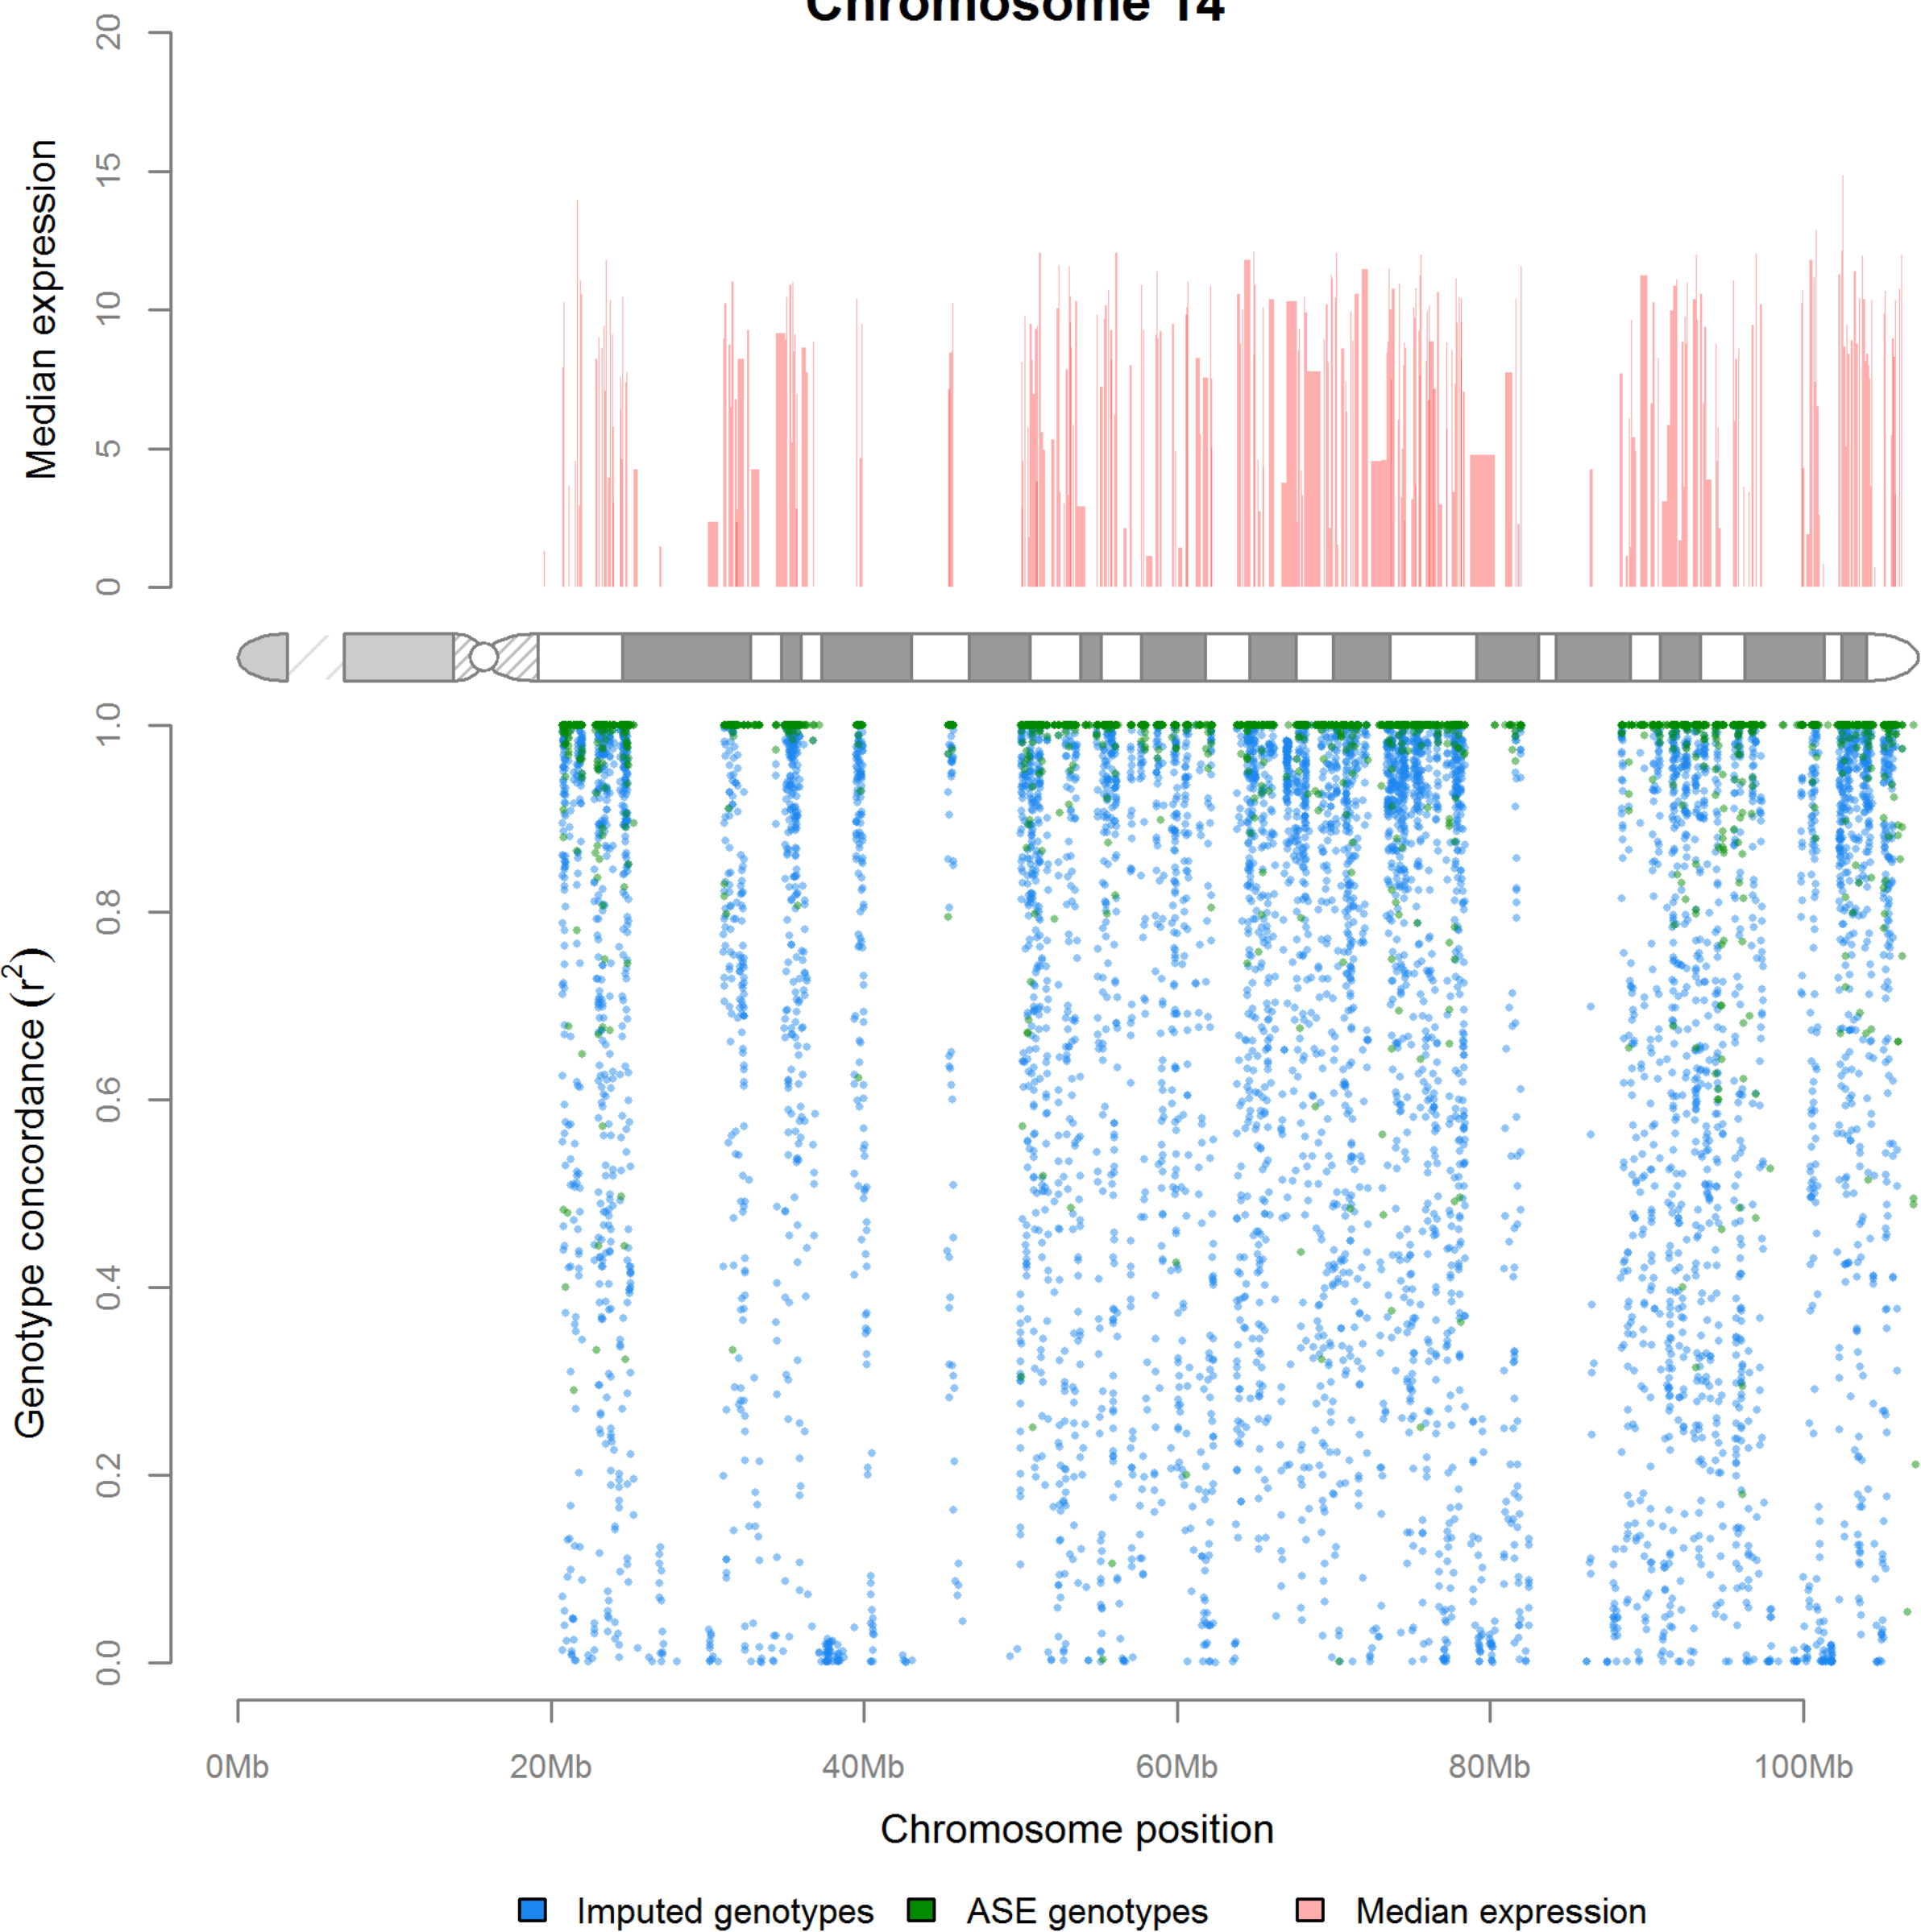

# Chromosome 15

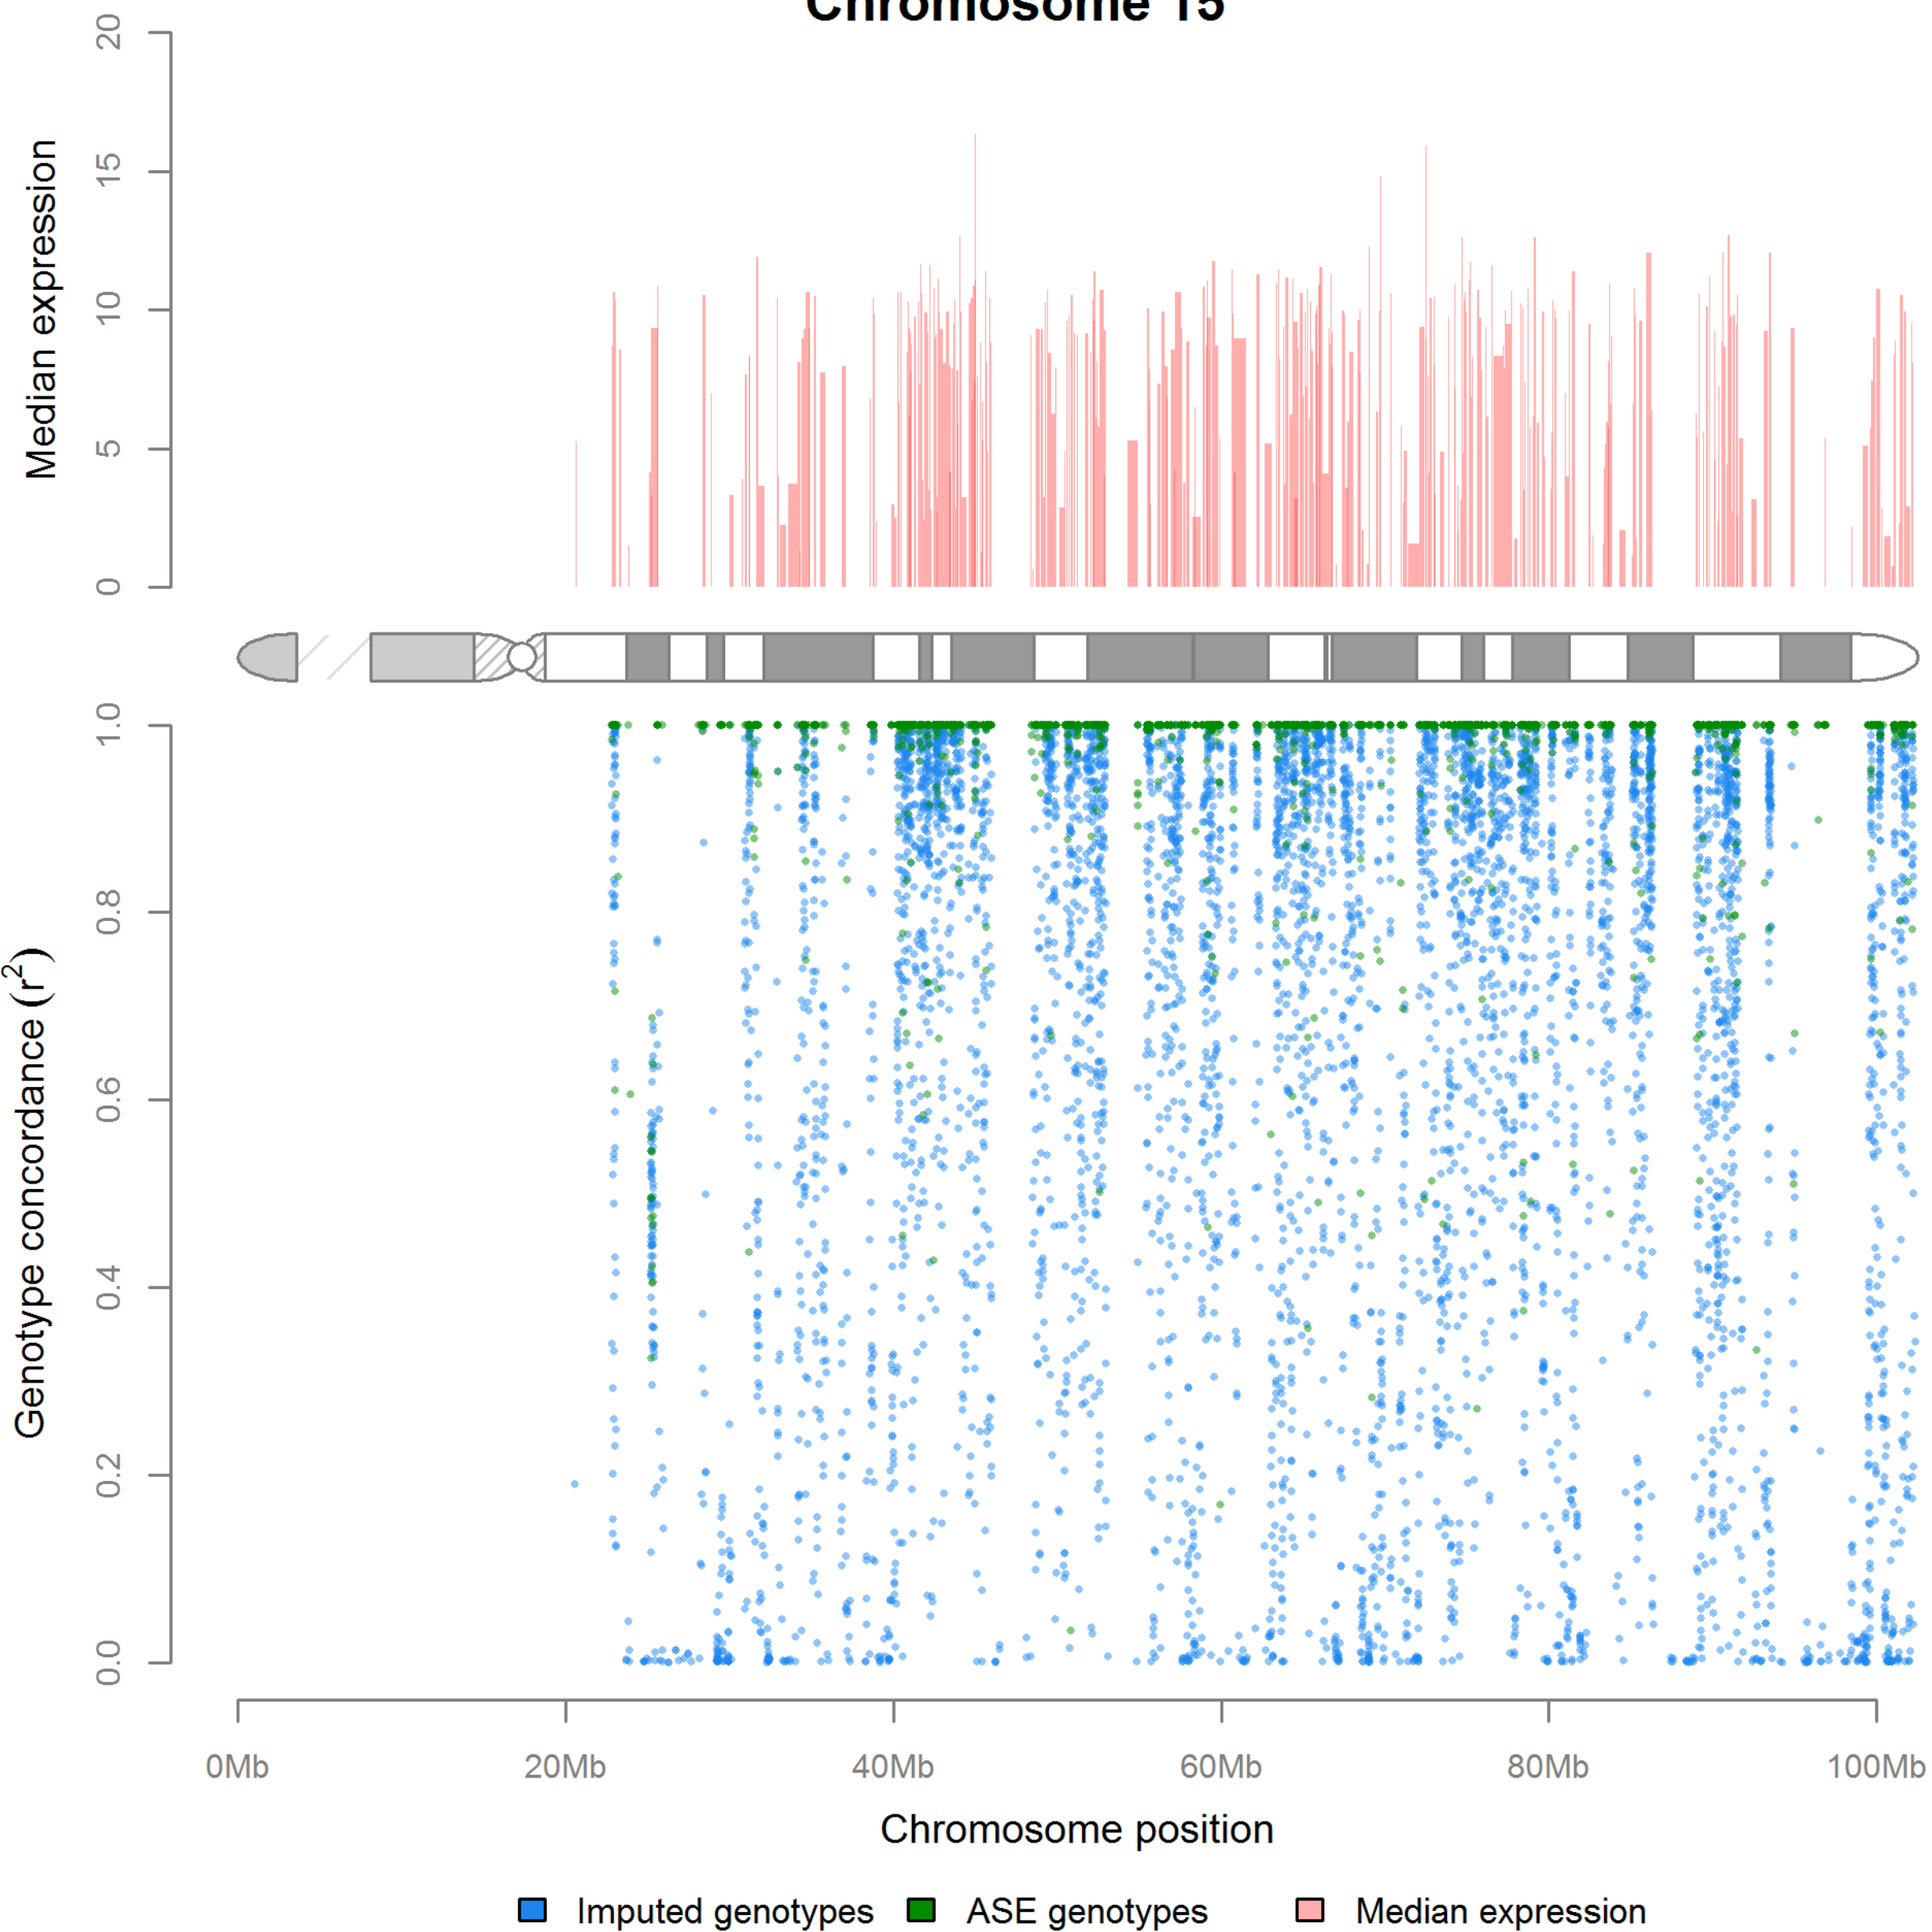

# Chromosome 16

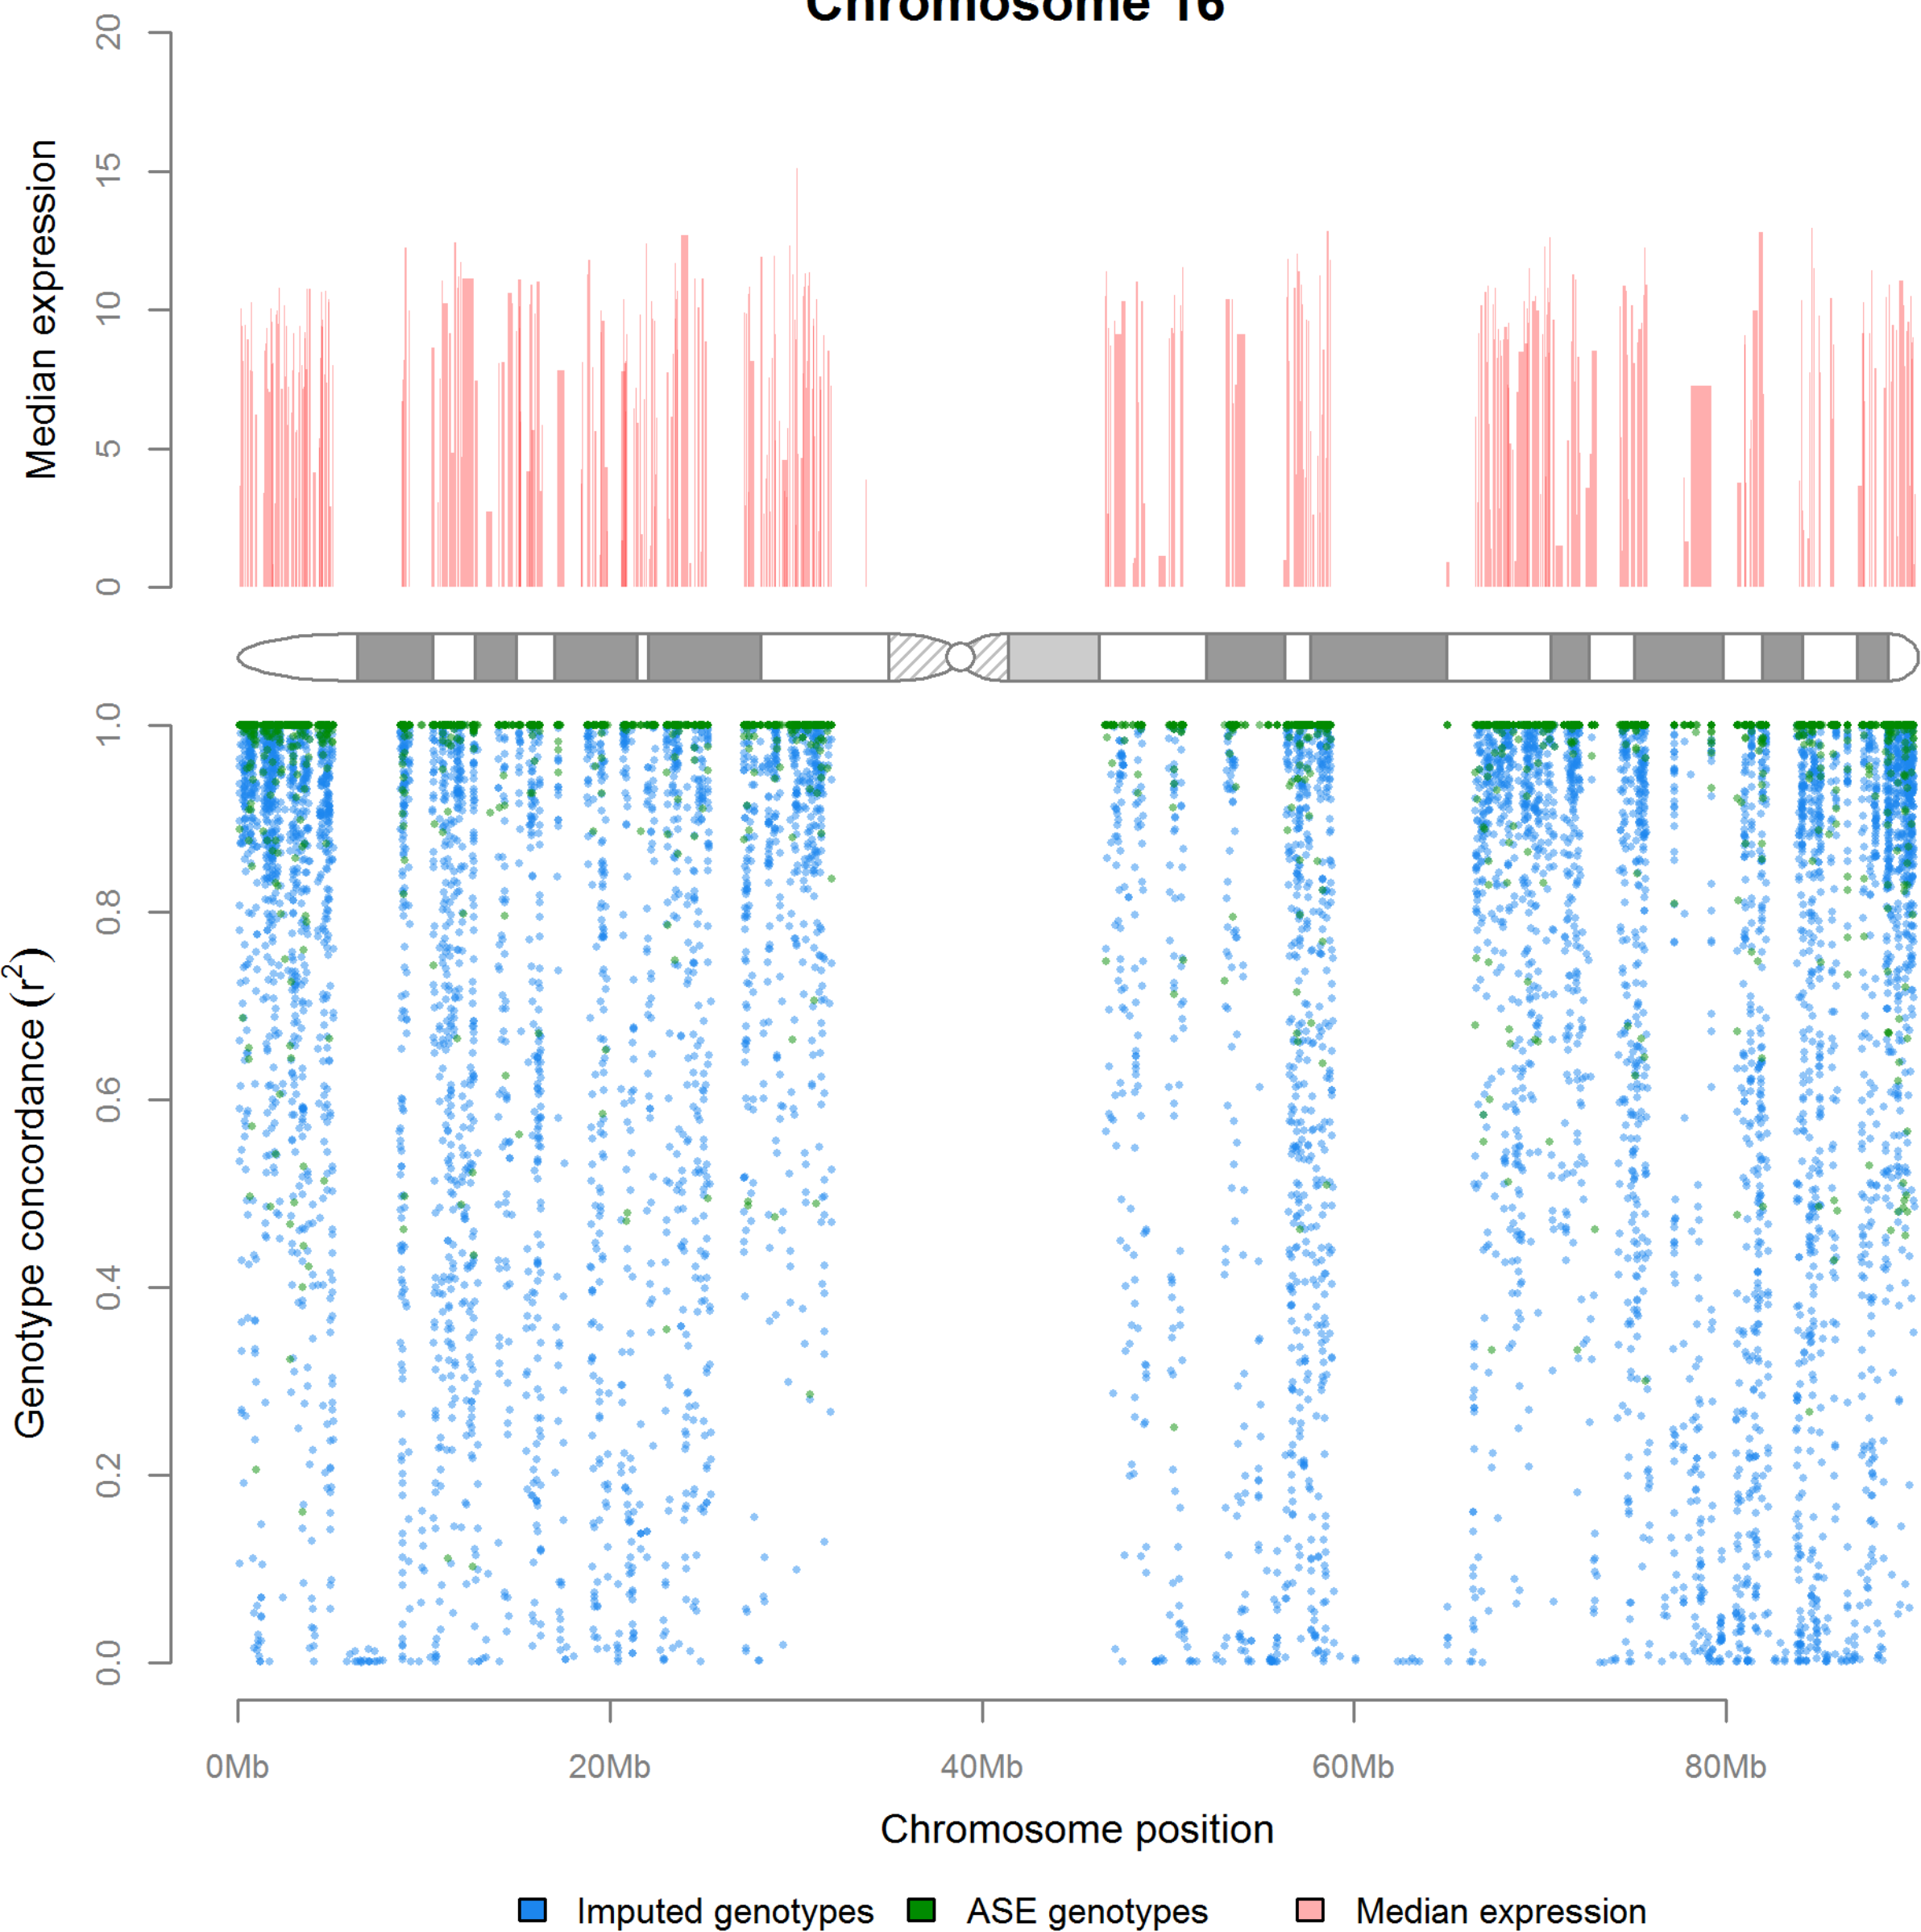



# Chromosome 17

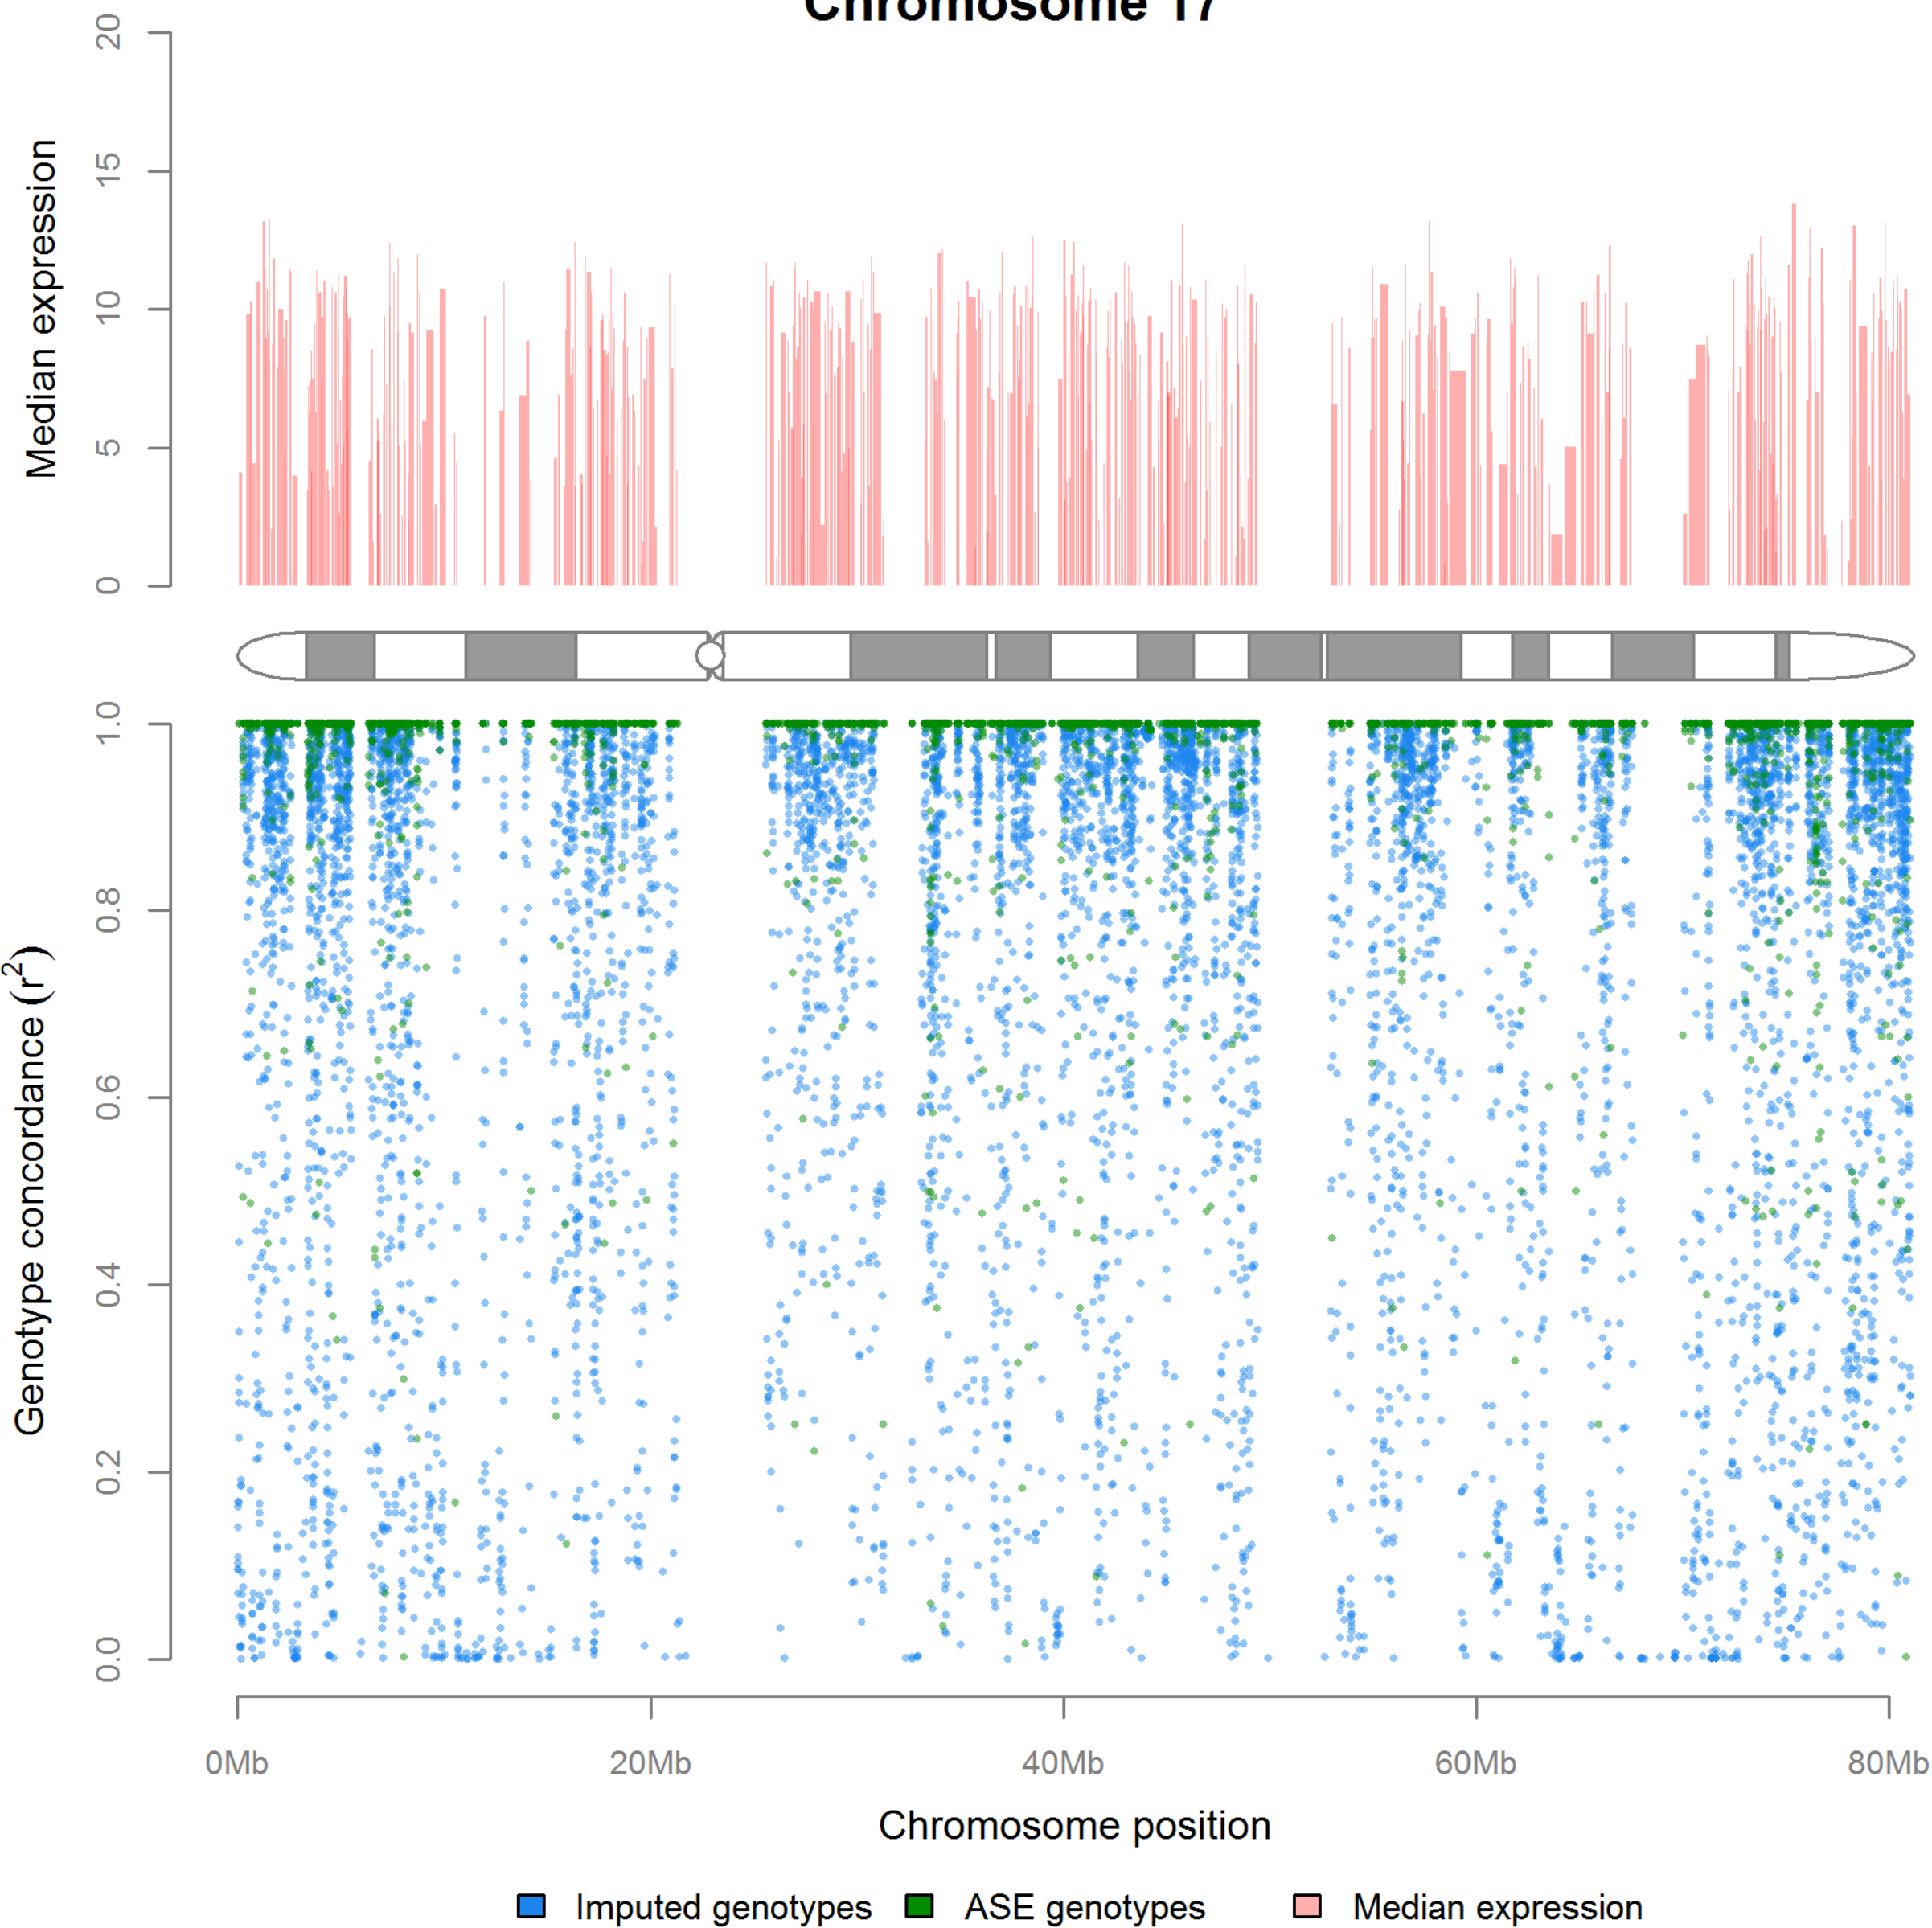

# Chromosome 18

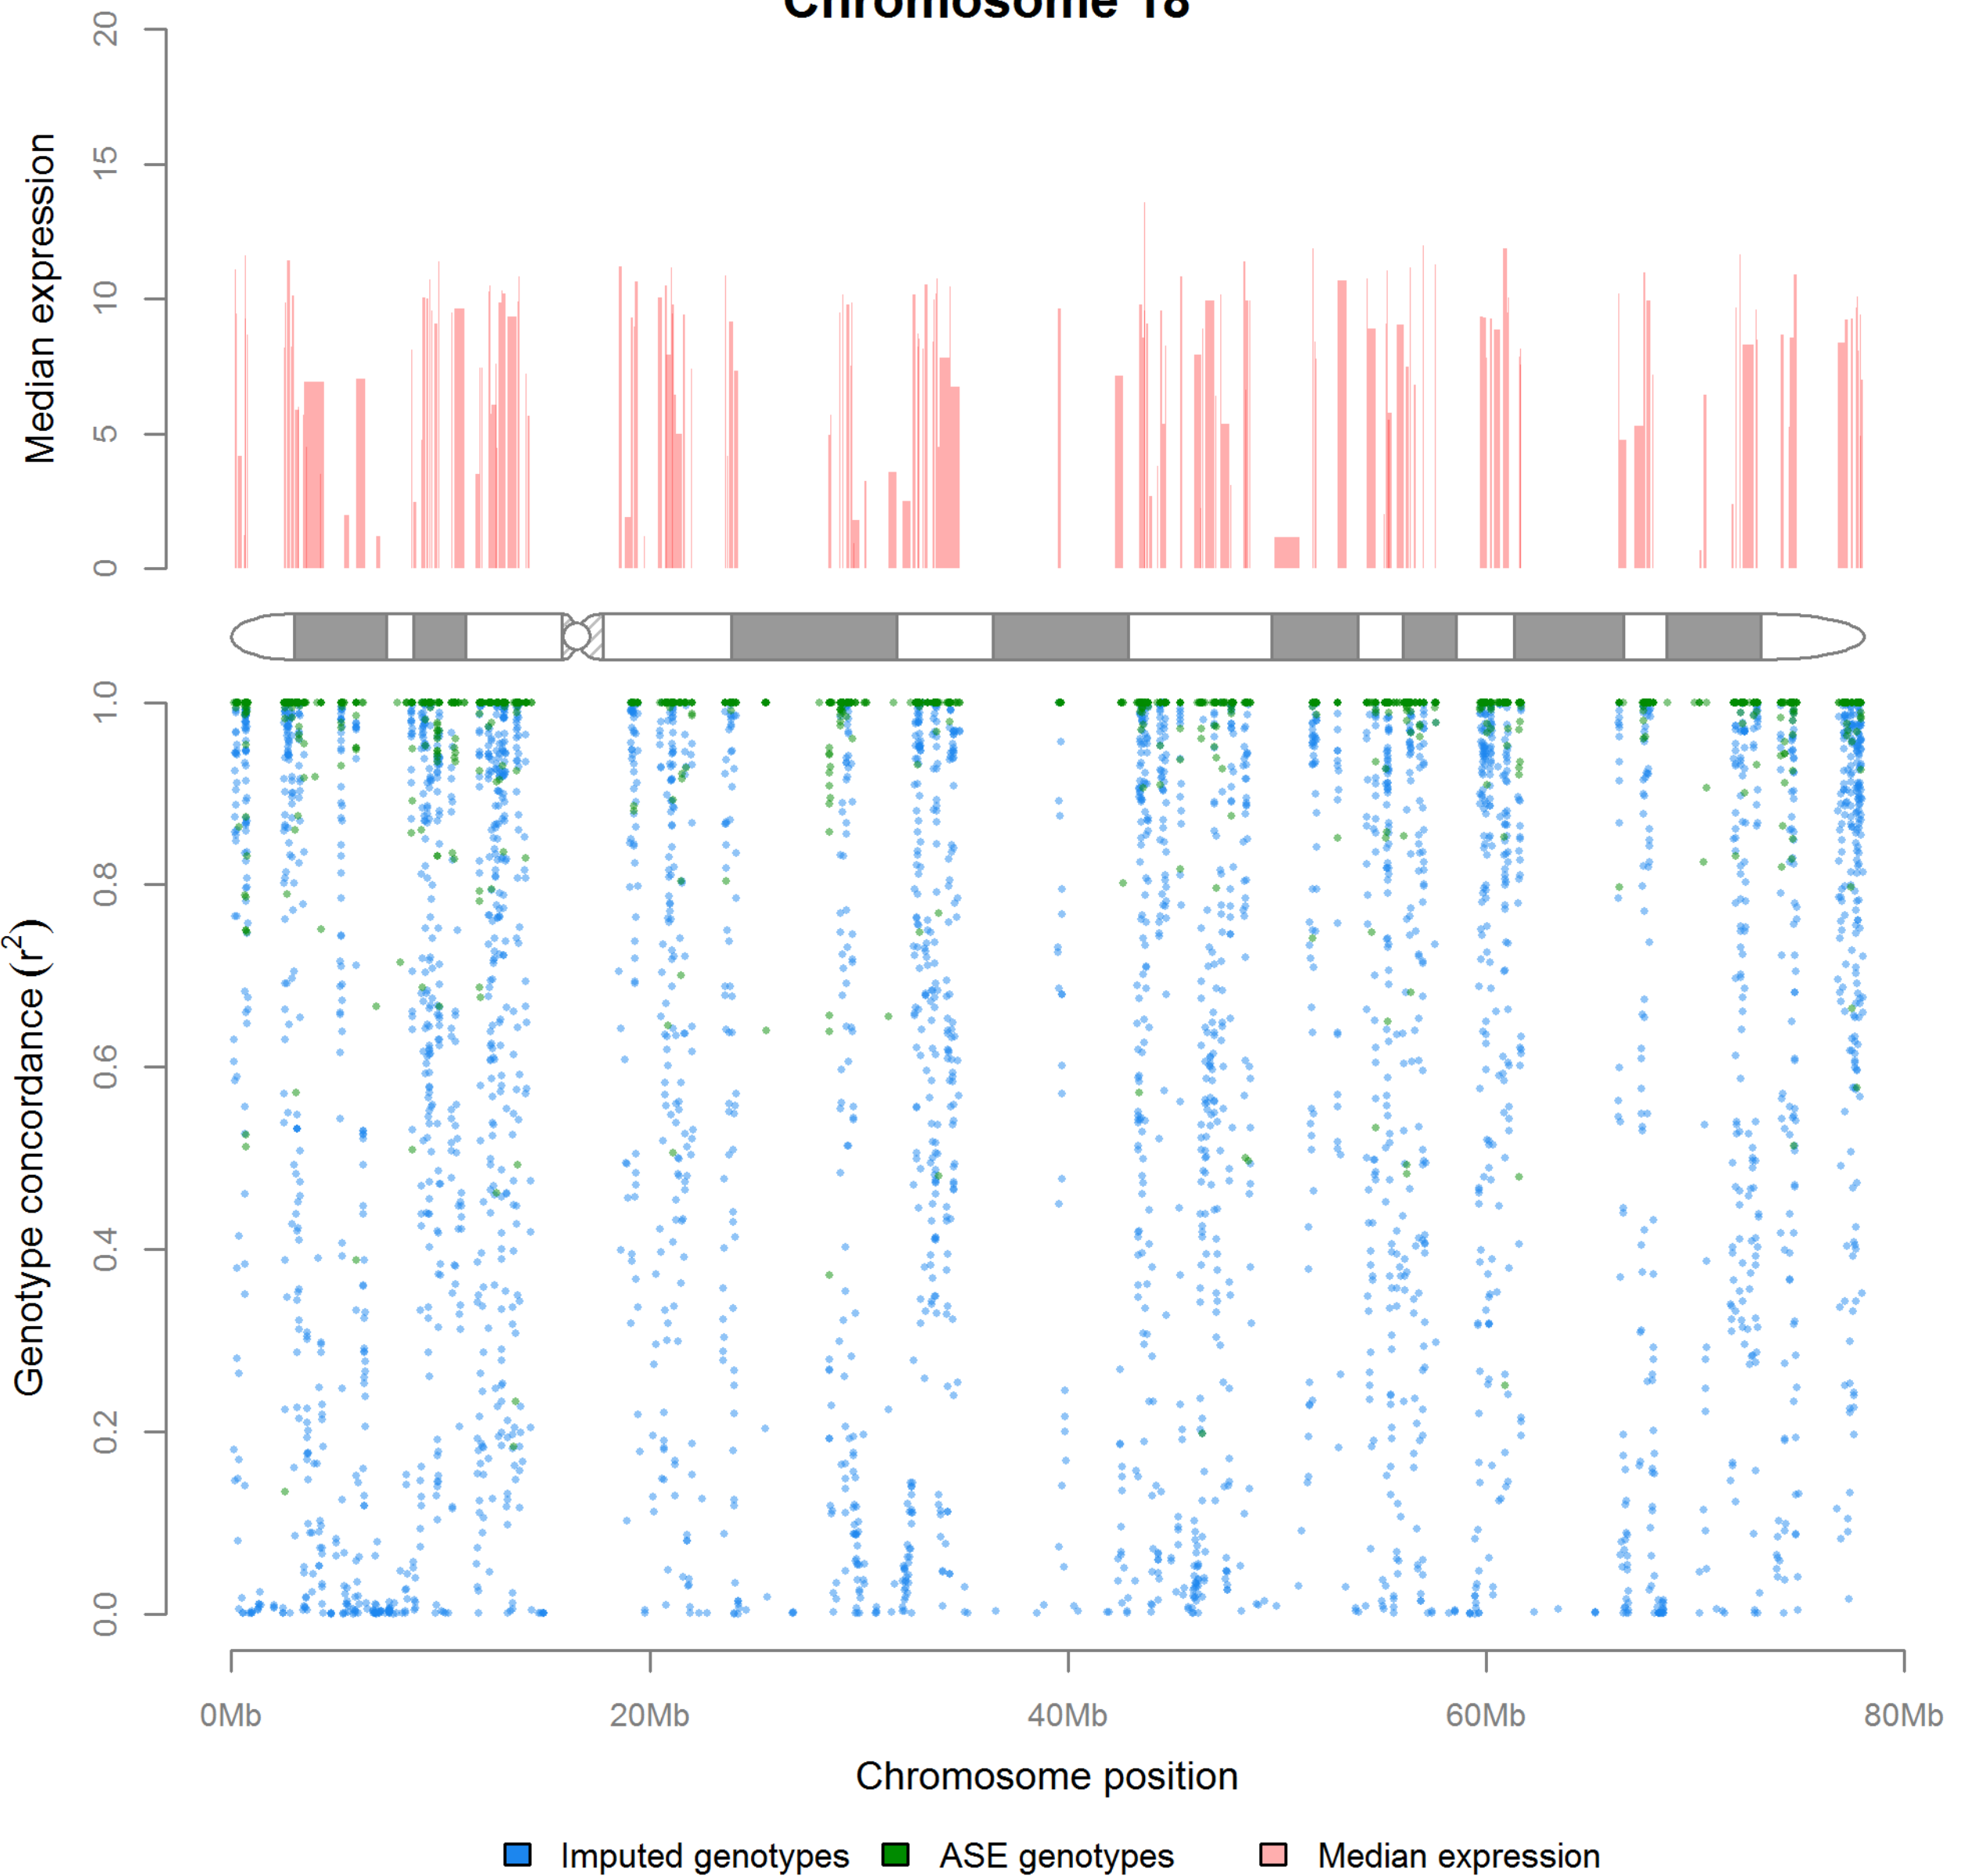

# Chromosome 19

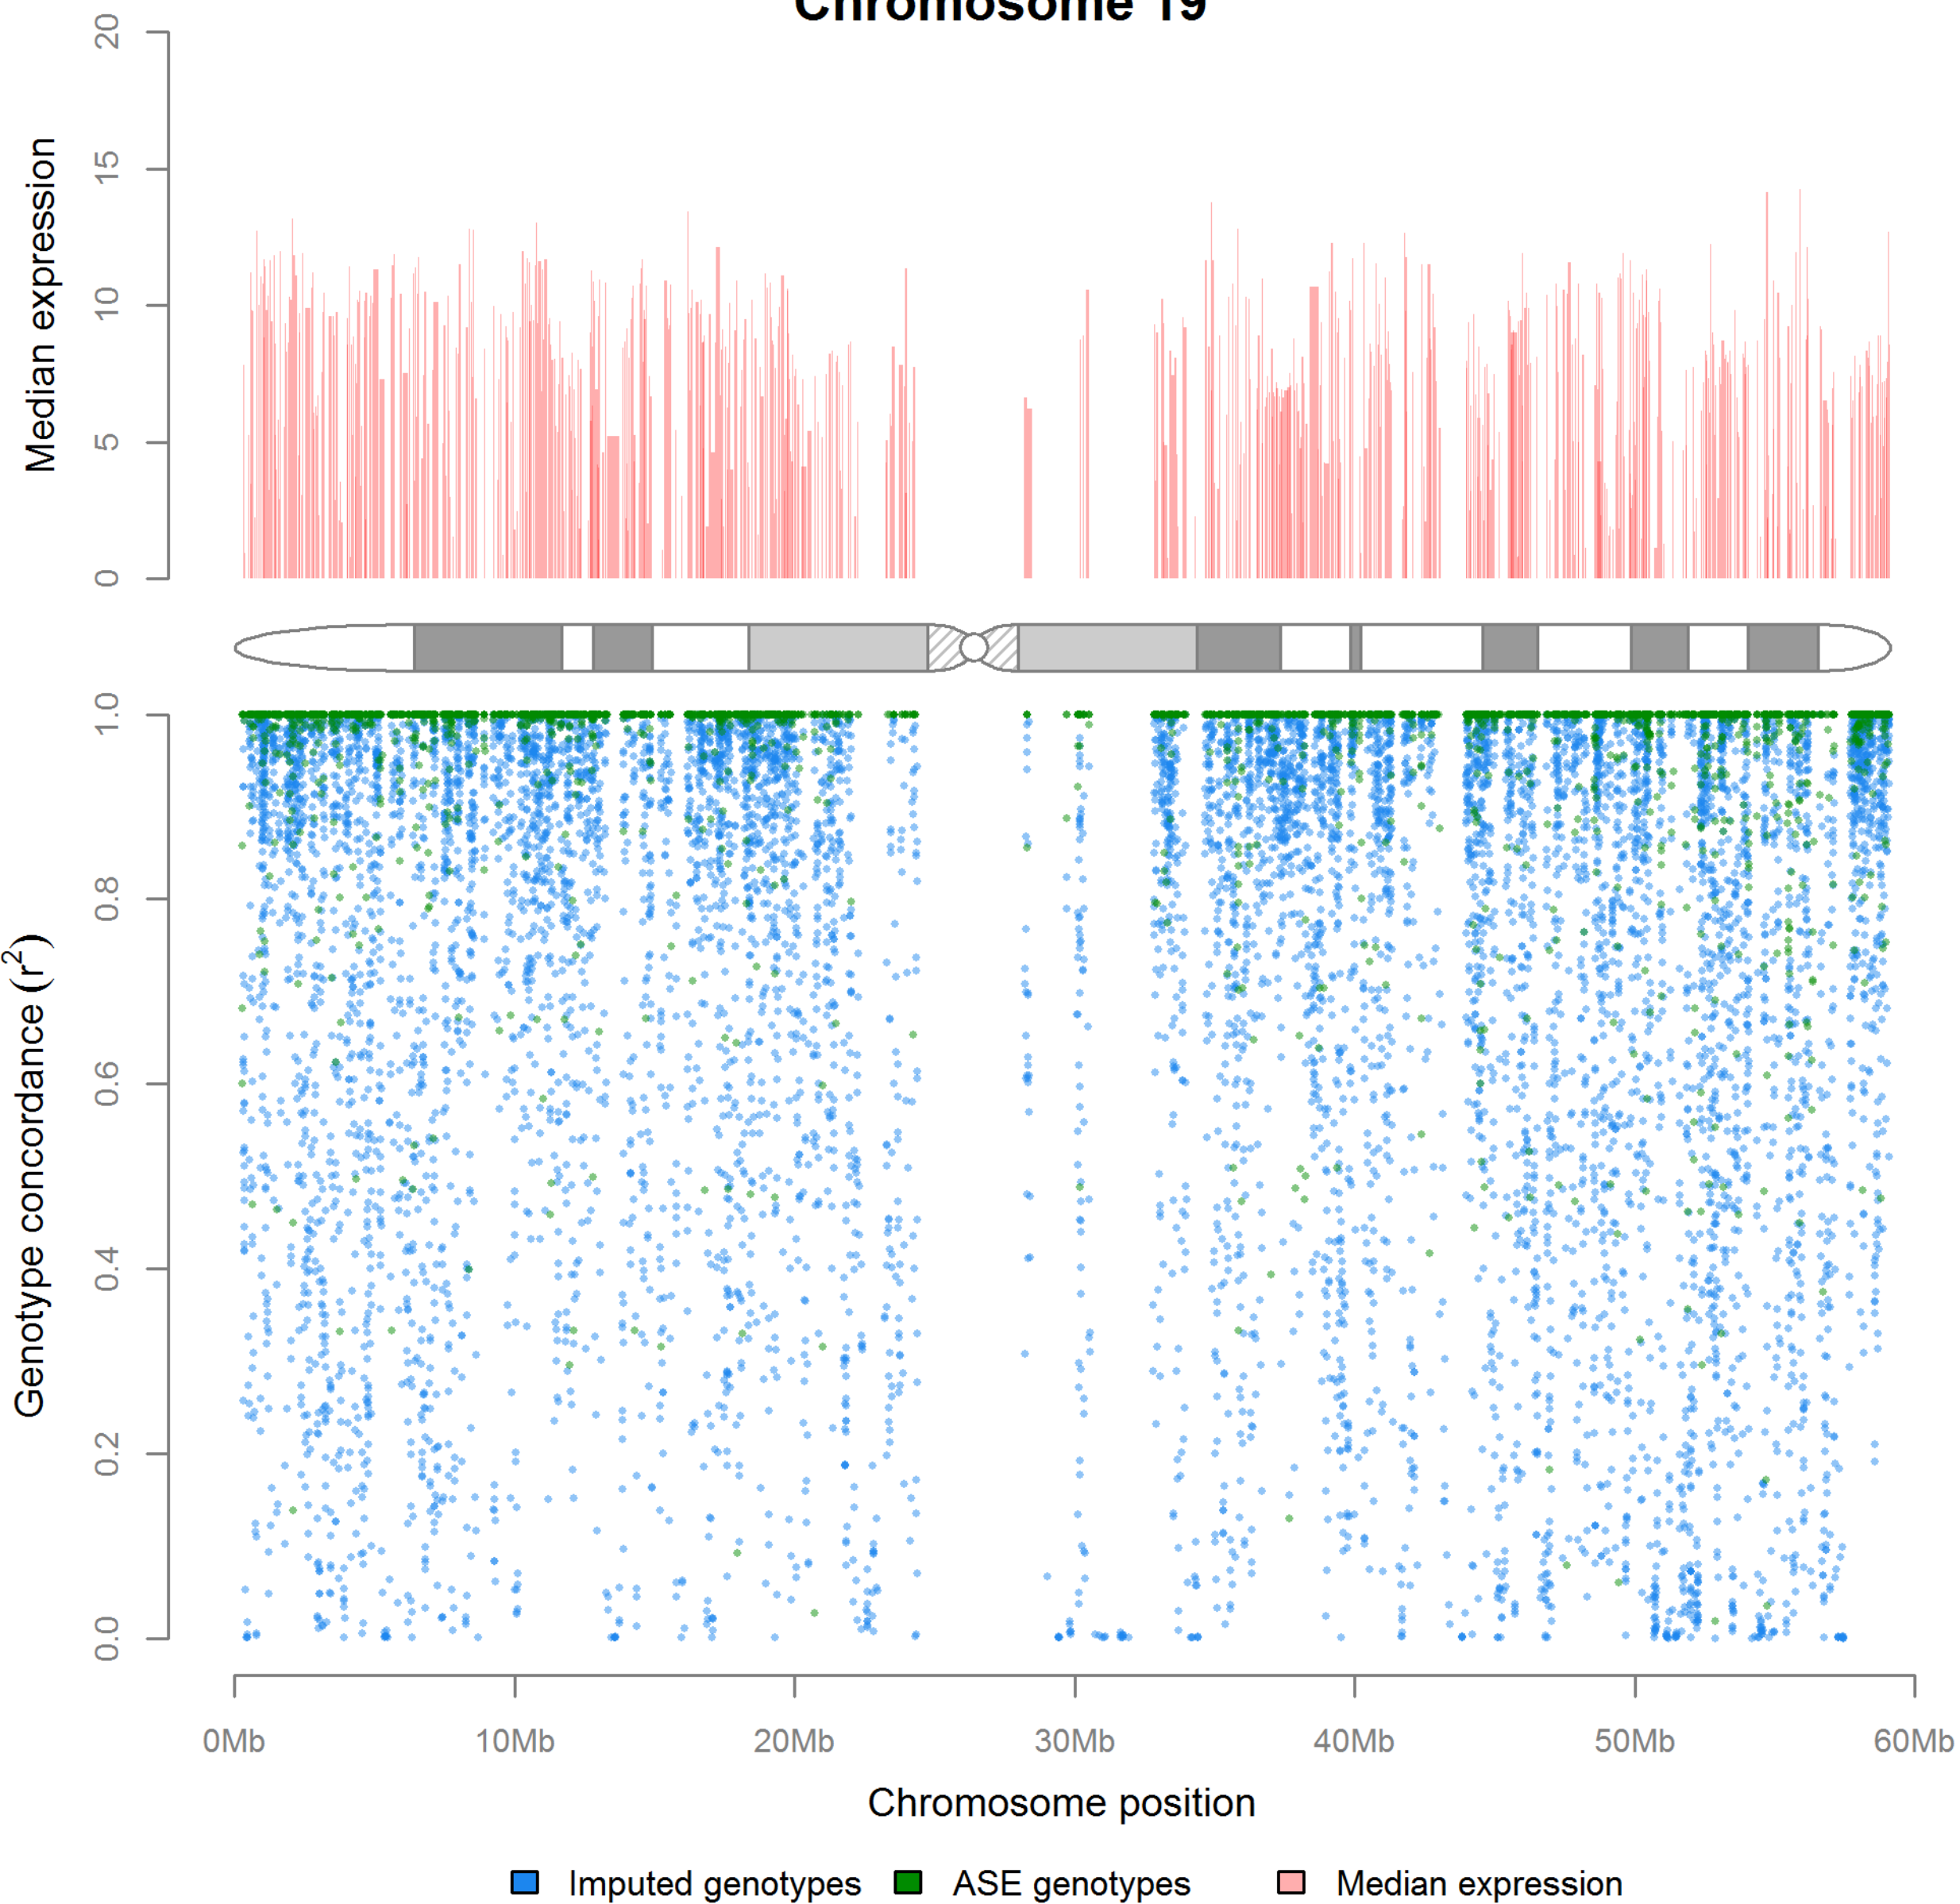

# Chromosome 20

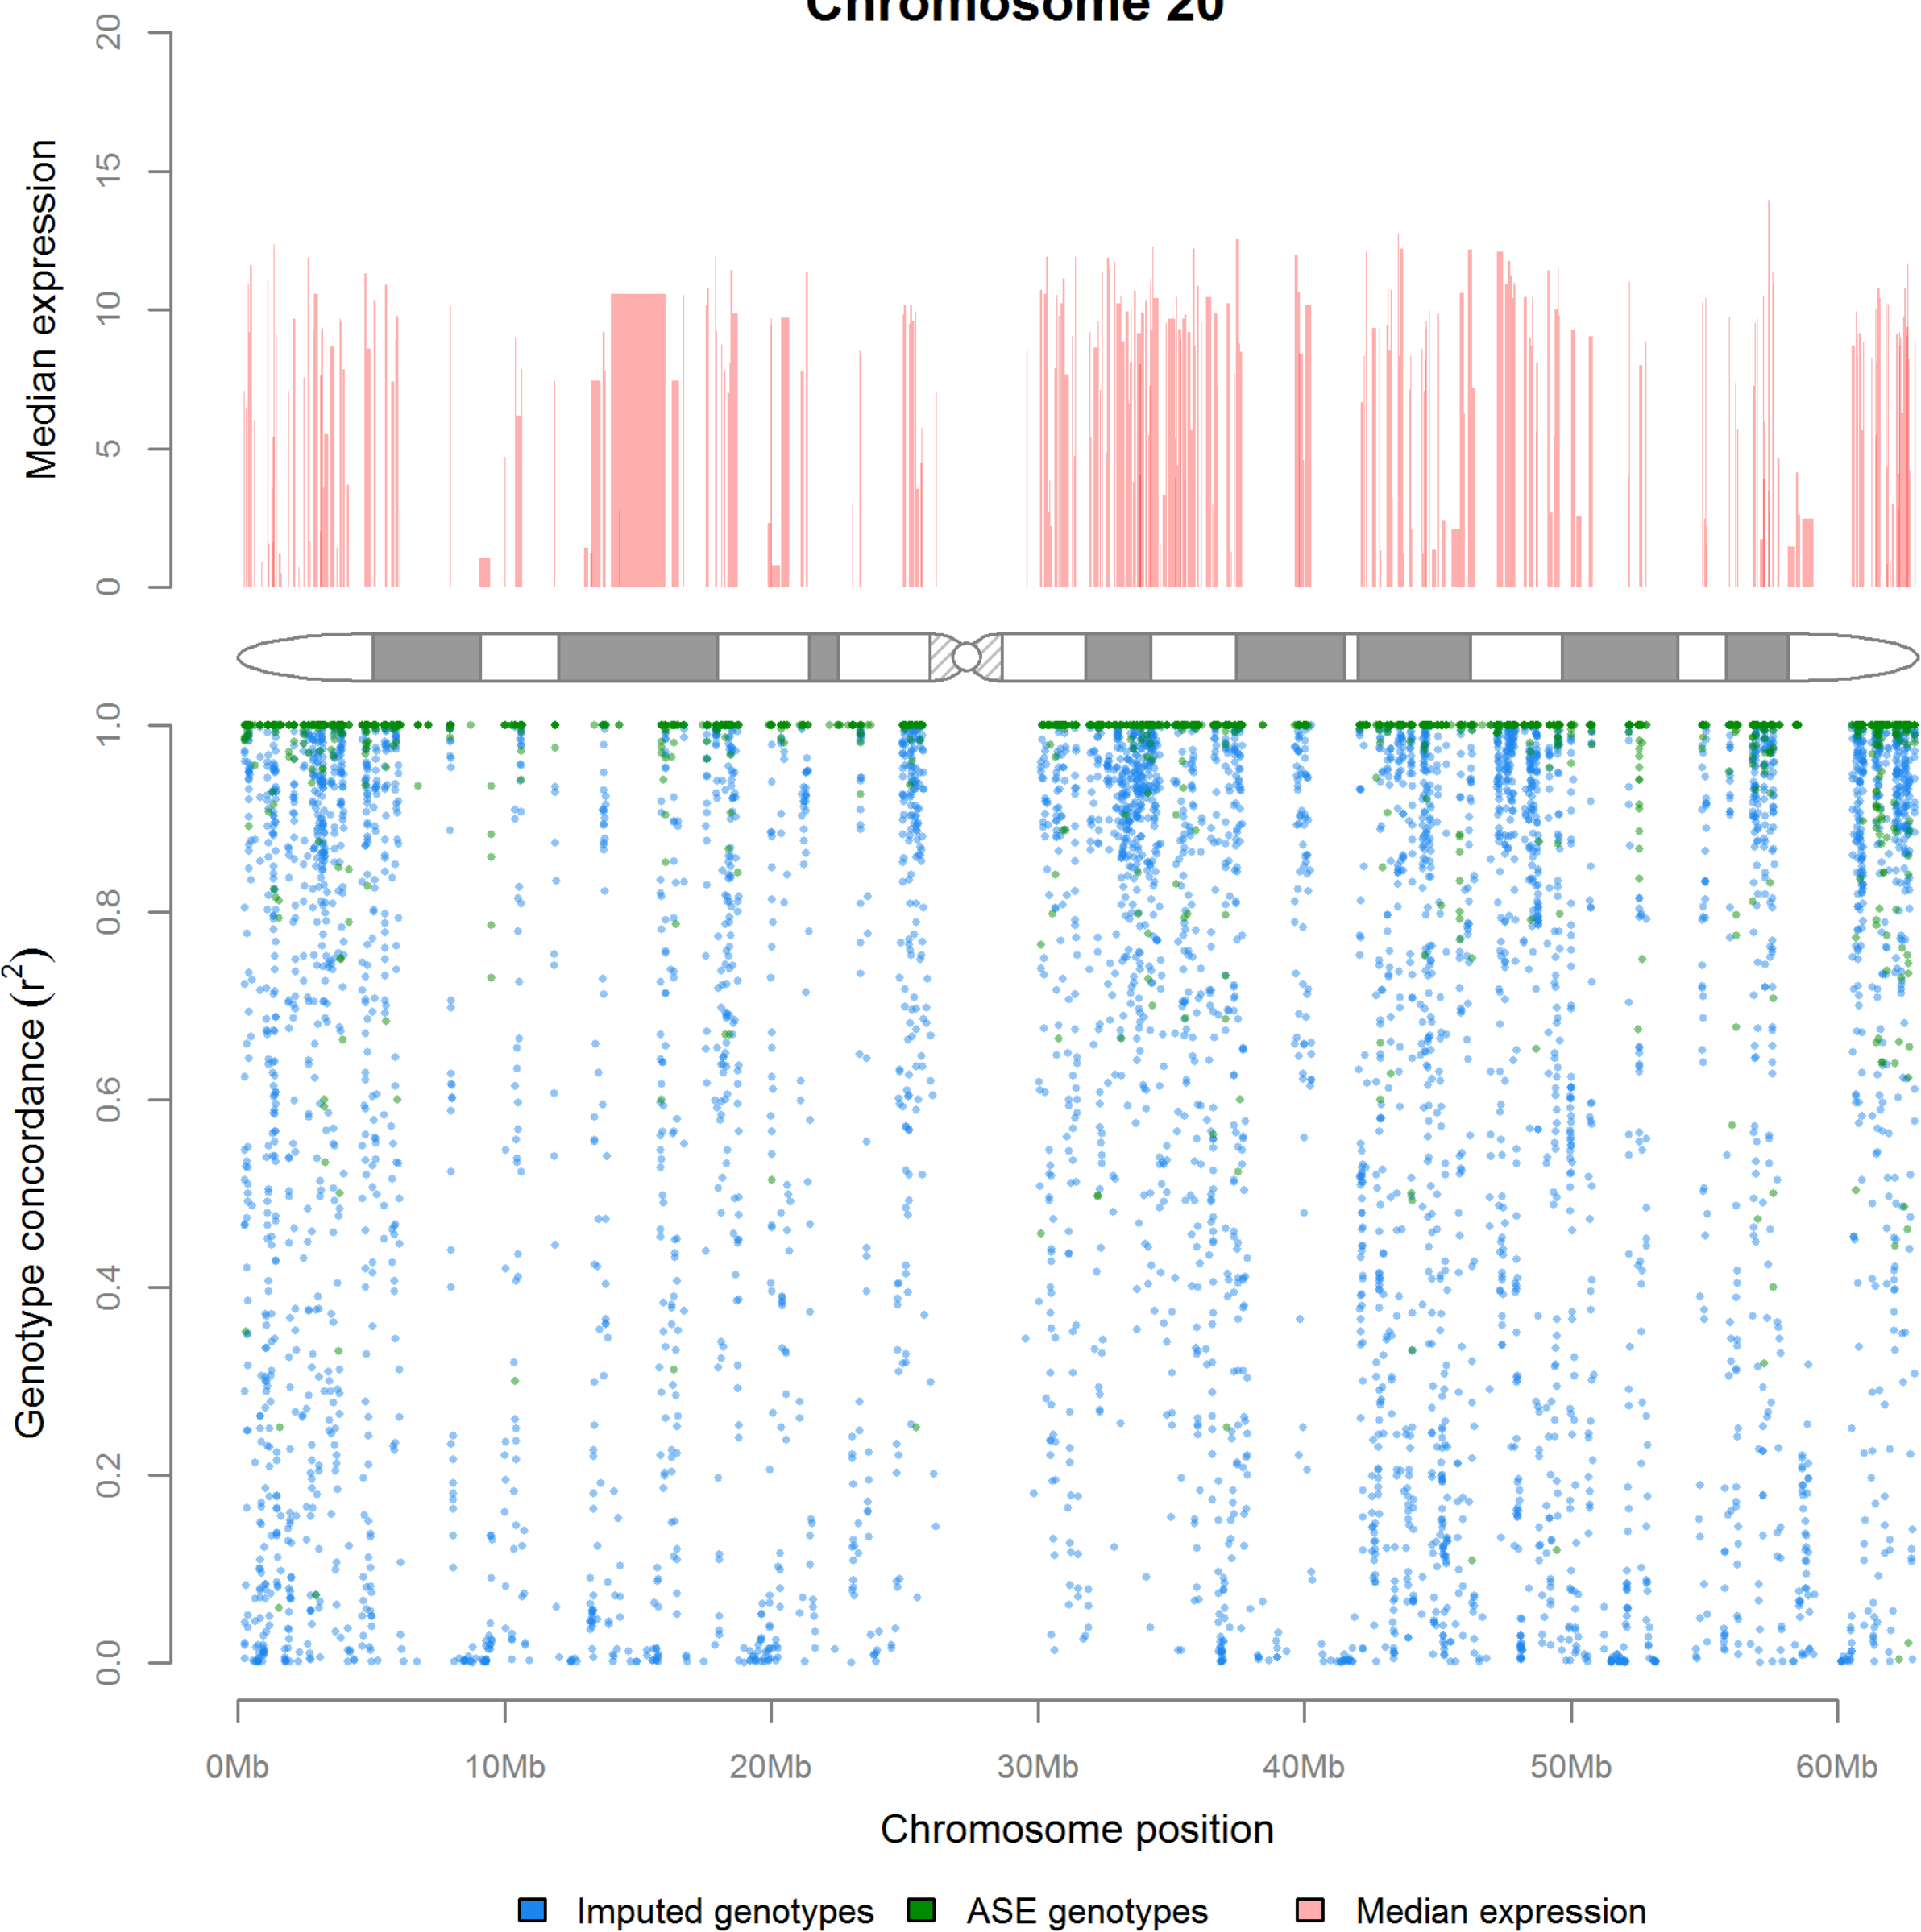

# Chromosome 21

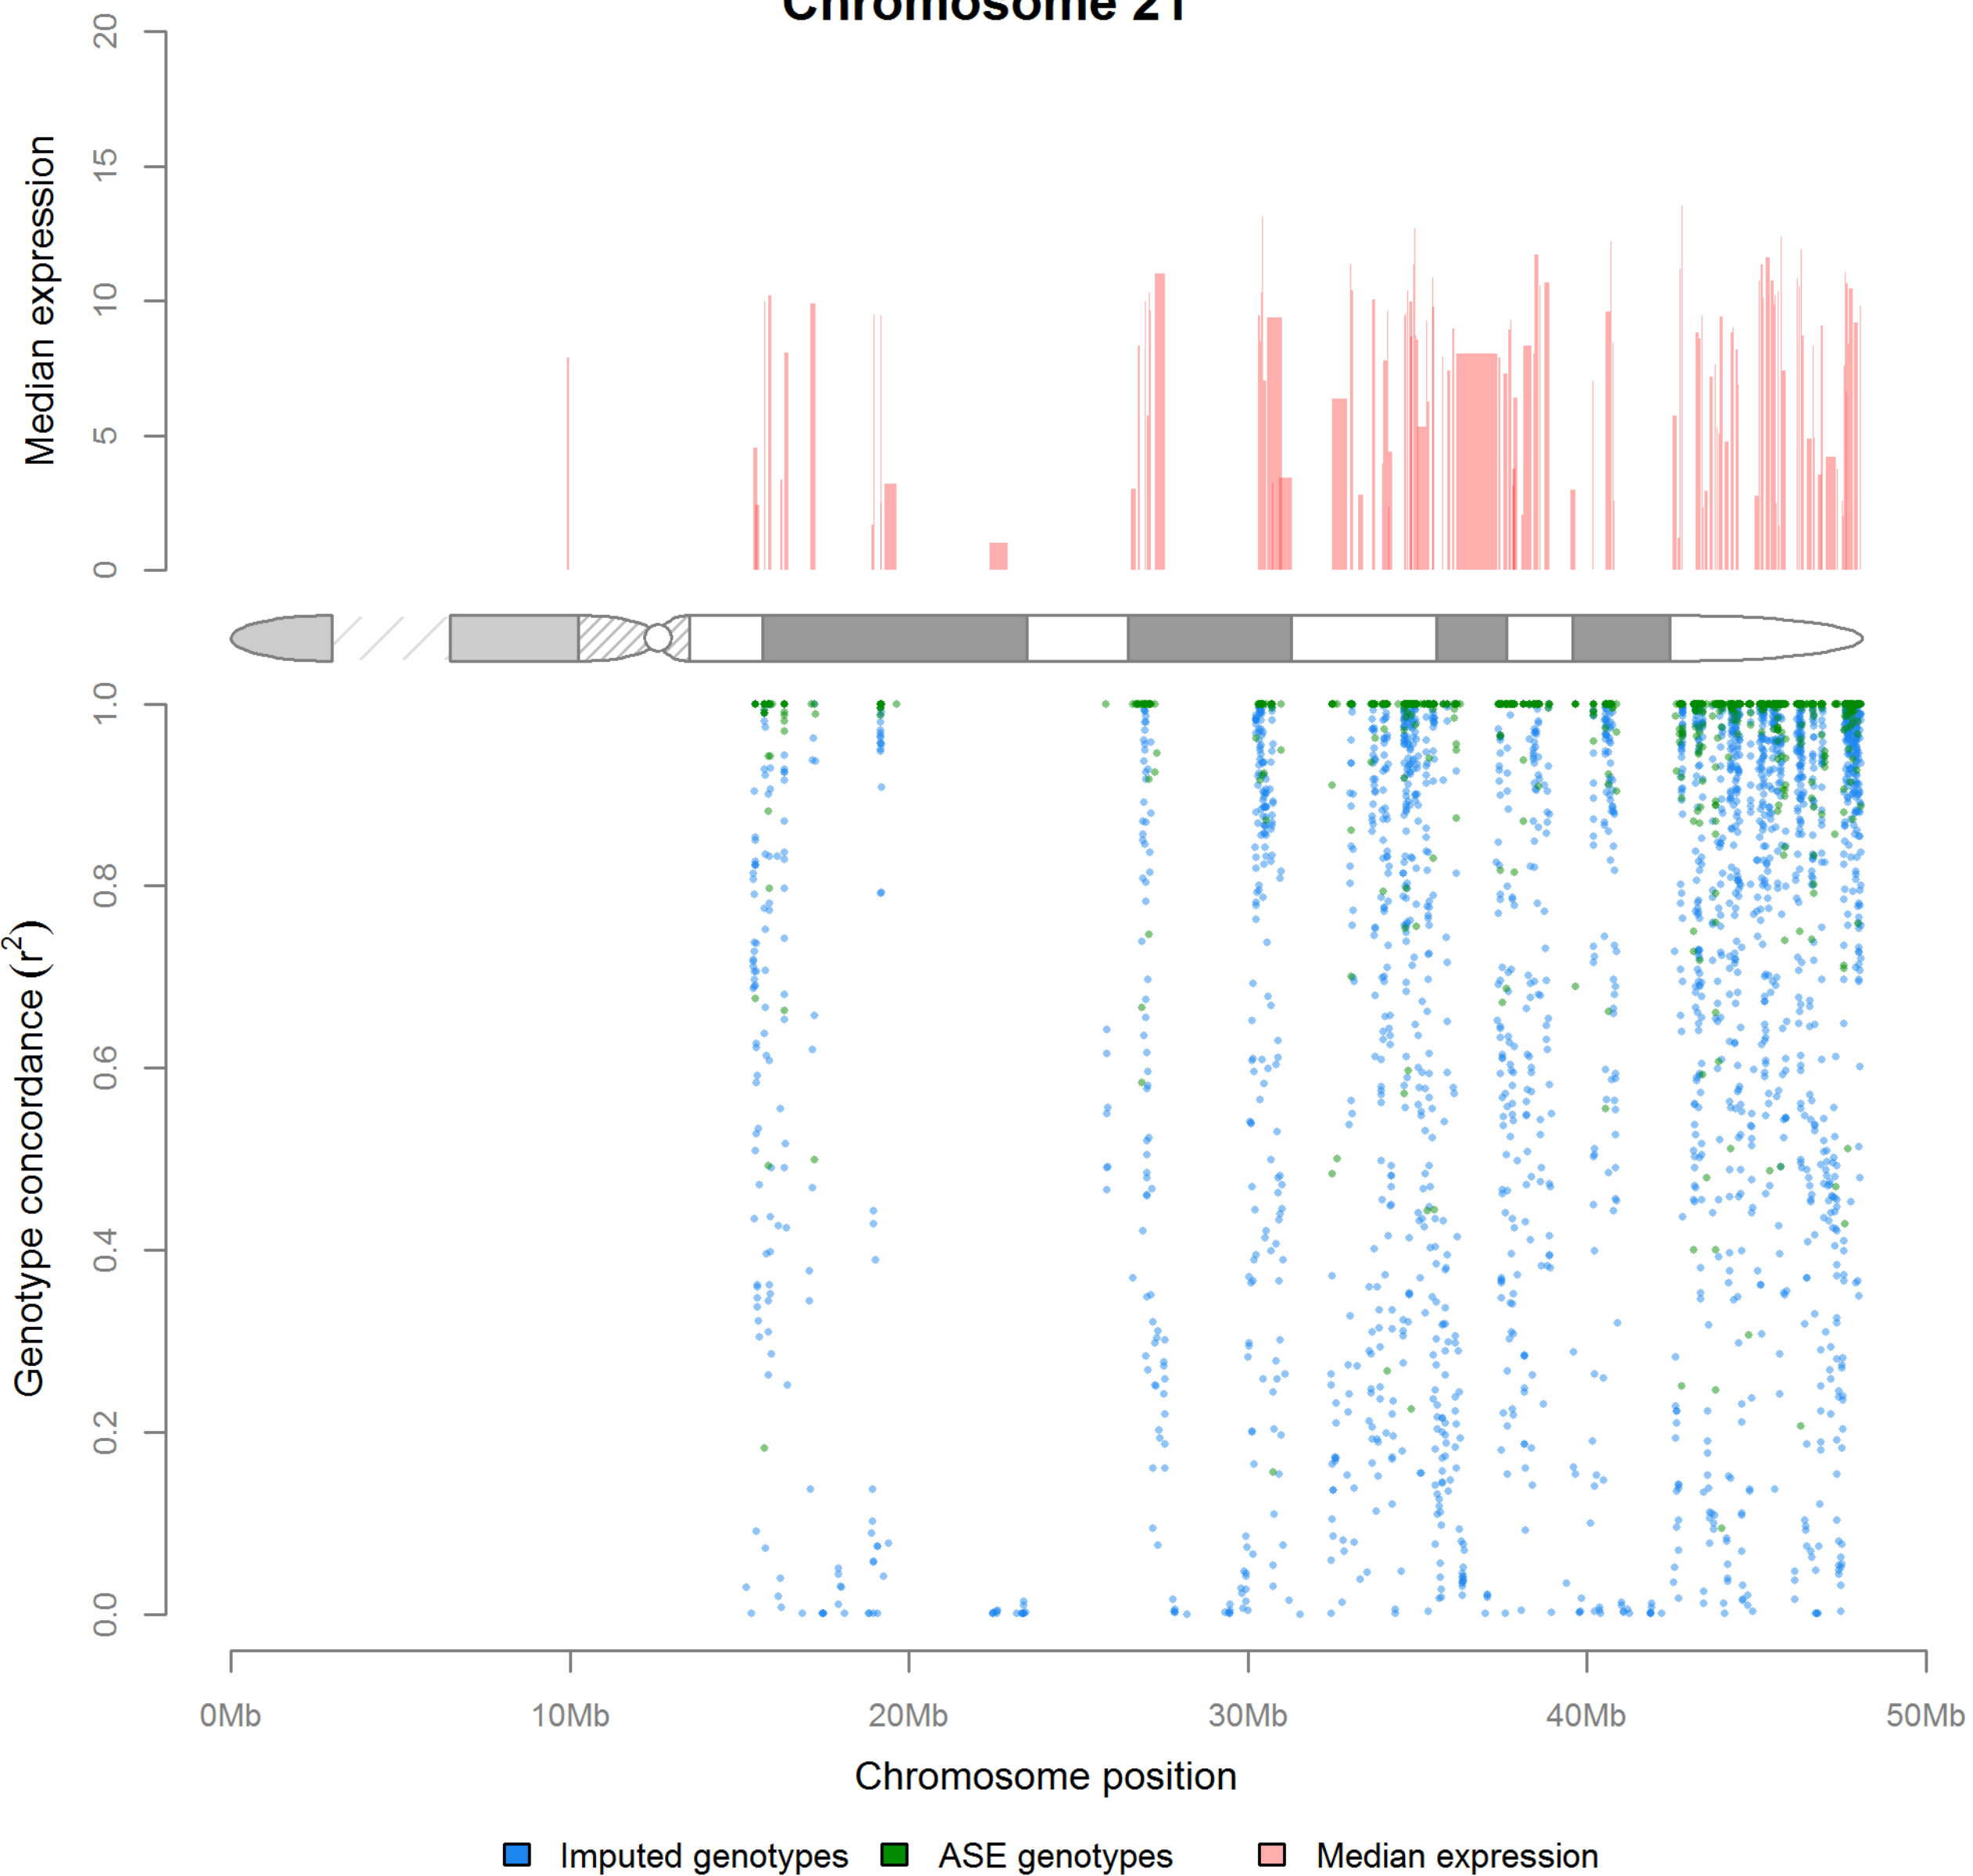

# Chromosome 22

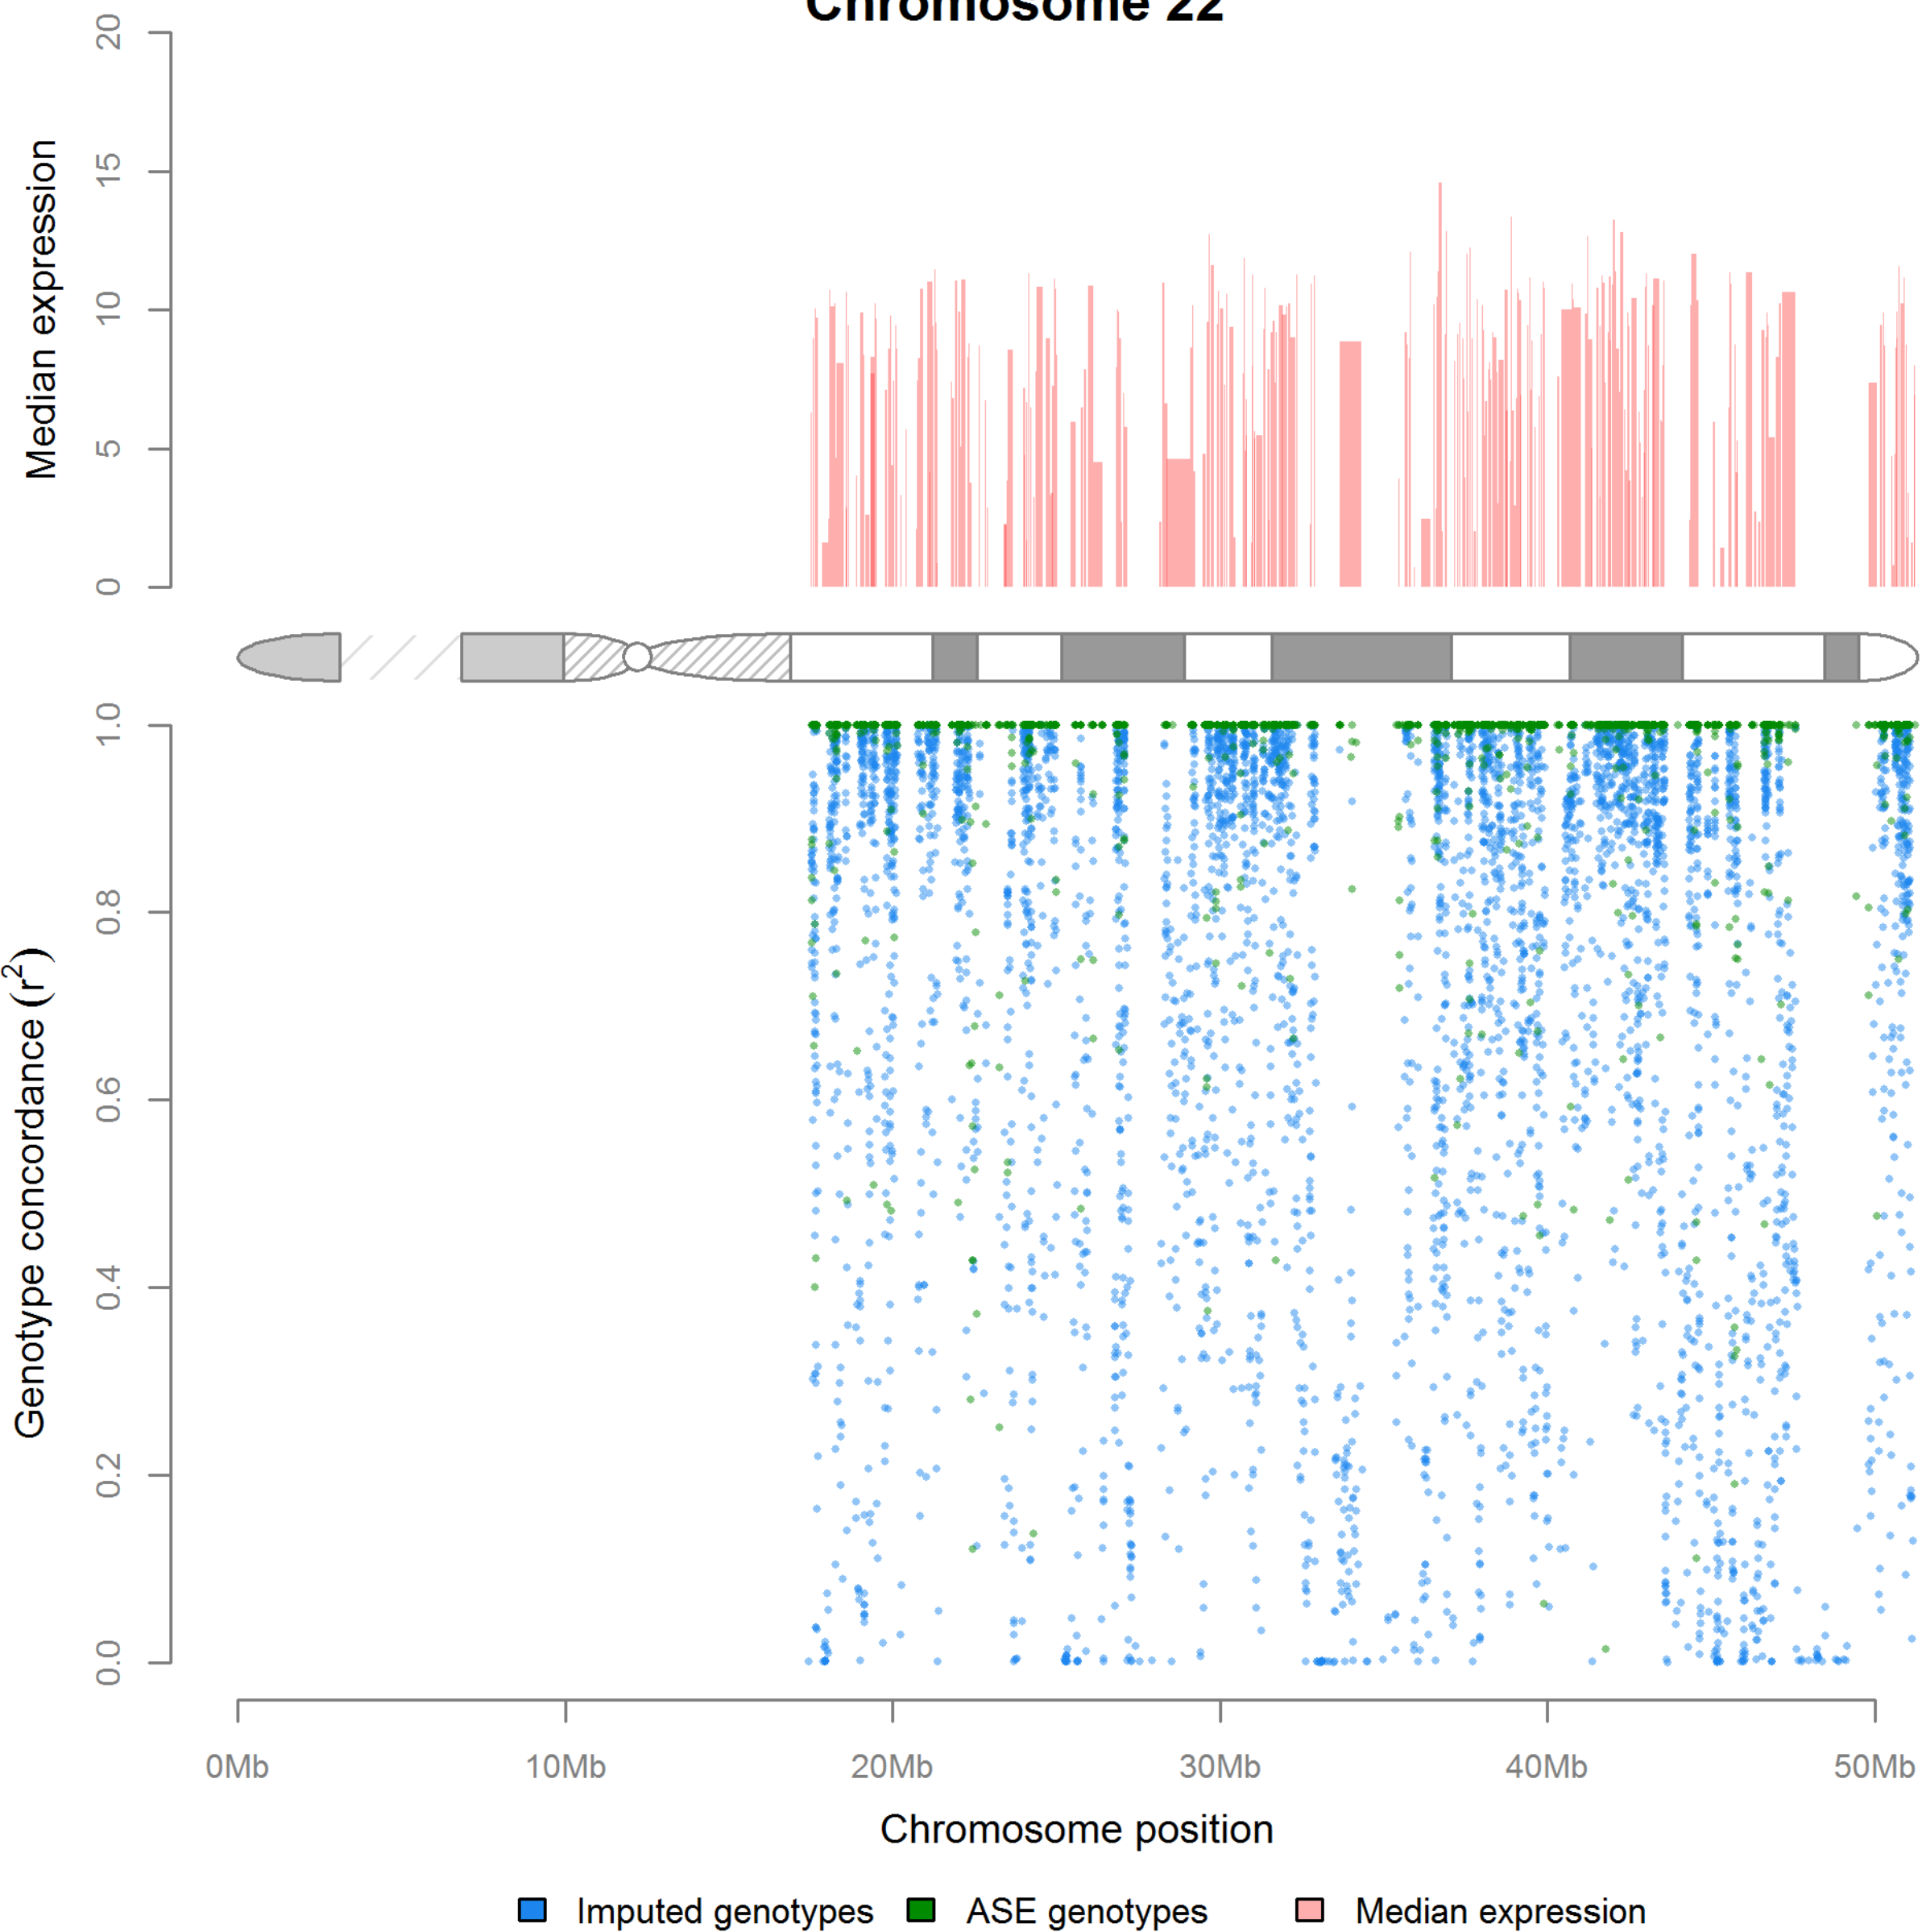

Supplement: 13073_2015_152_MOESM8_ESM.pdf [file 13073_2015_152_MOESM8_ESM.pdf]
