# Supplementary material for: Calling genotypes from public RNA-sequencing data enables identification of genetic variants that affect gene-expression levels
Source: PubMed Central journal article supplement (PMC4423486; doi:10.1186/s13073-015-0152-4), 2015-03-27

**a**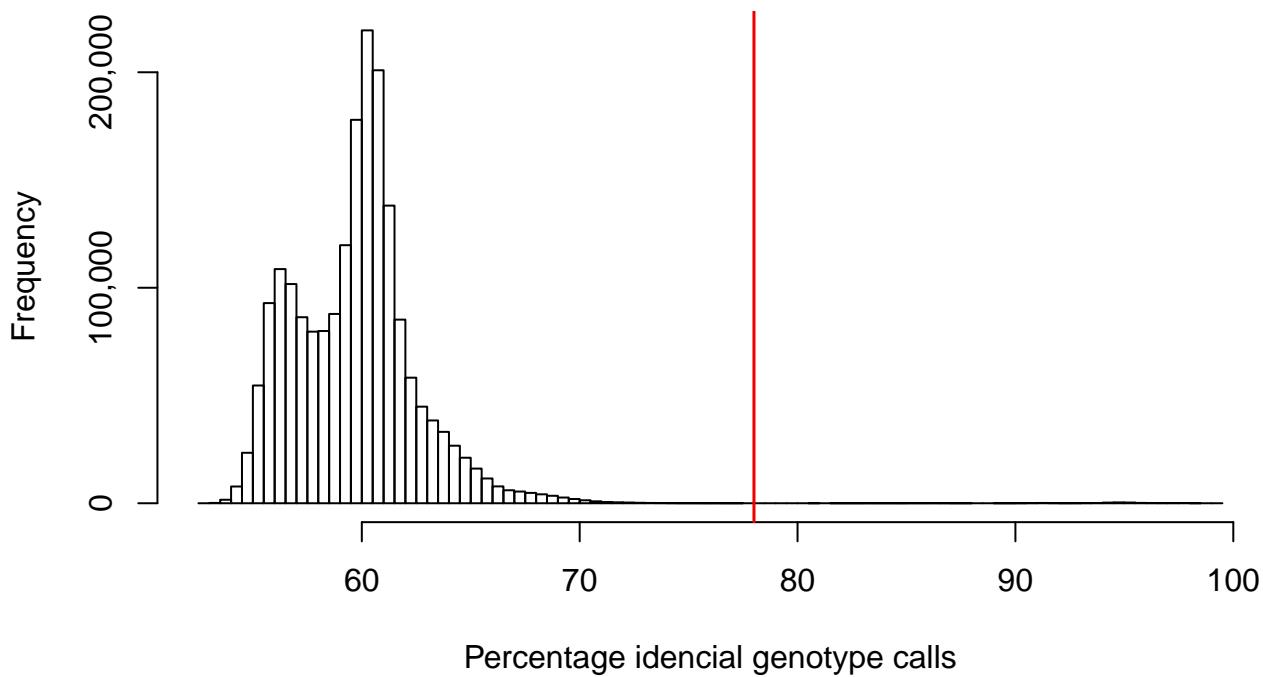**b**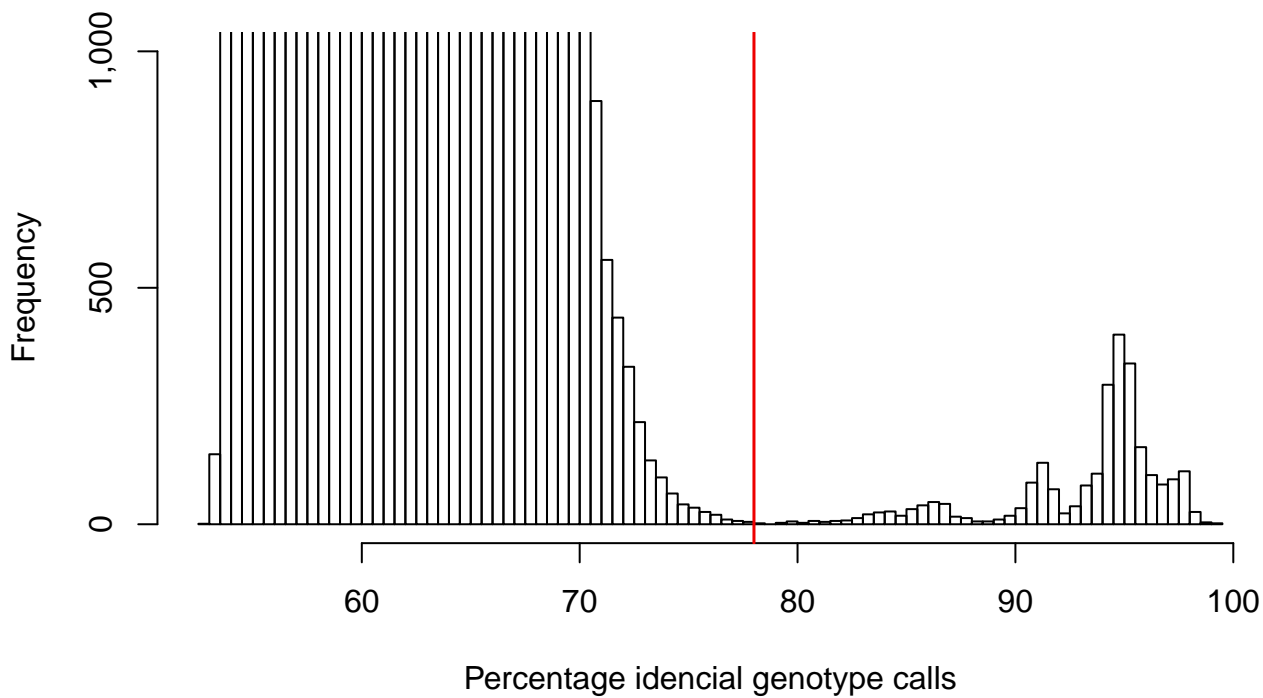

Supplement: 13073_2015_152_MOESM4_ESM.pdf [file 13073_2015_152_MOESM4_ESM.pdf]
