# Supplementary material for: Calling genotypes from public RNA-sequencing data enables identification of genetic variants that affect gene-expression levels
Source: PubMed Central journal article supplement (PMC4423486; doi:10.1186/s13073-015-0152-4), 2015-03-27

### Sequenced number of bases vs number of high quality genotype calls of 218 hematological samples

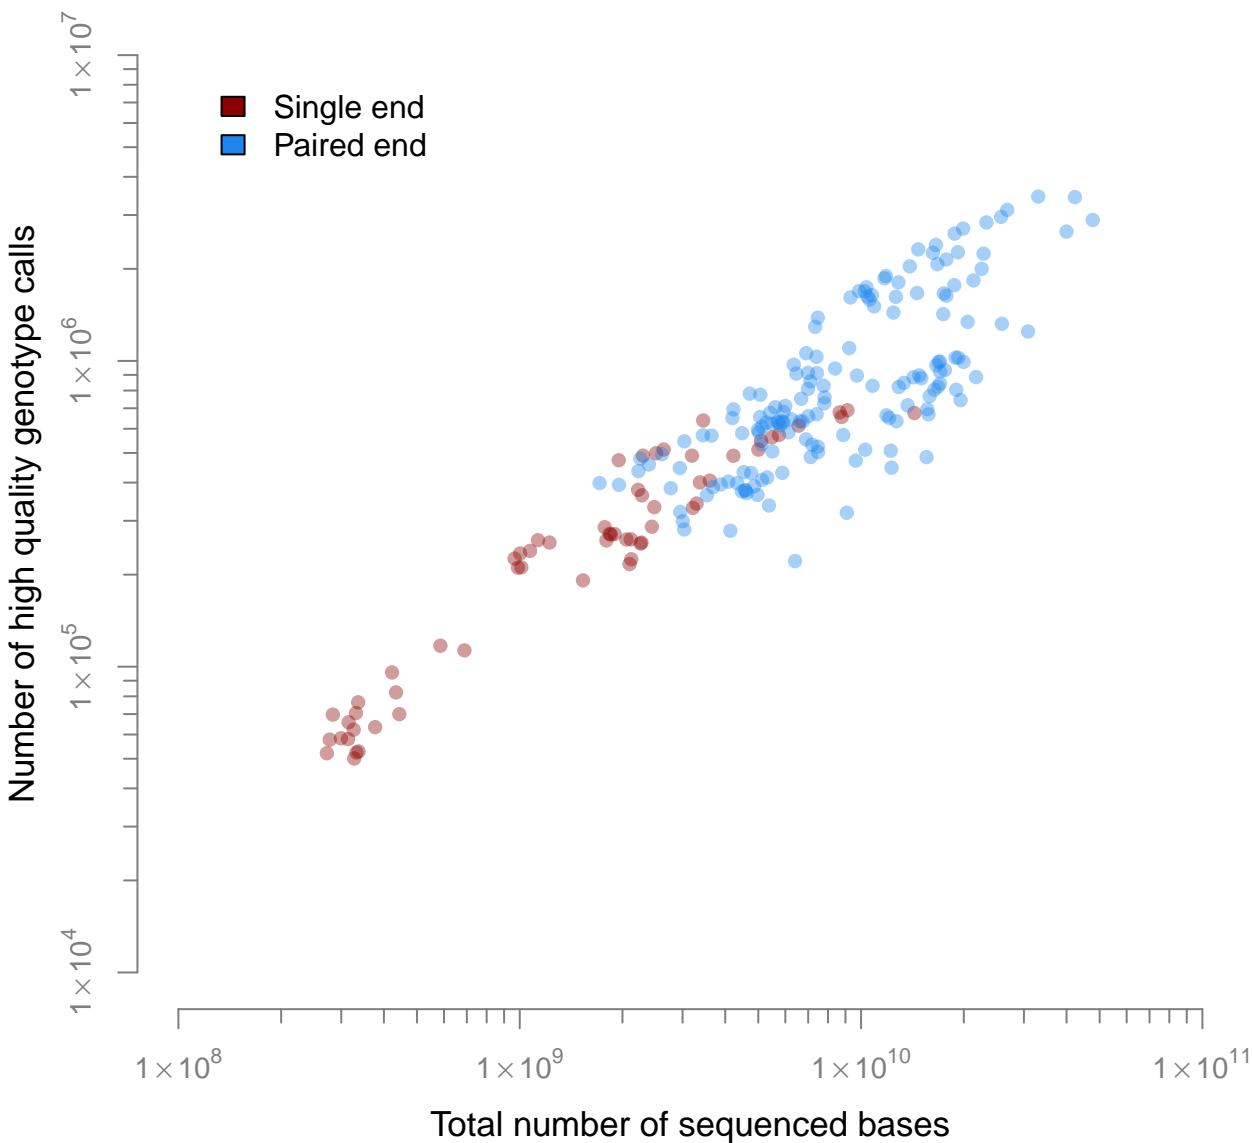

### Sequenced number of bases of the 1,262 samples used for eQTL and ASE analyses

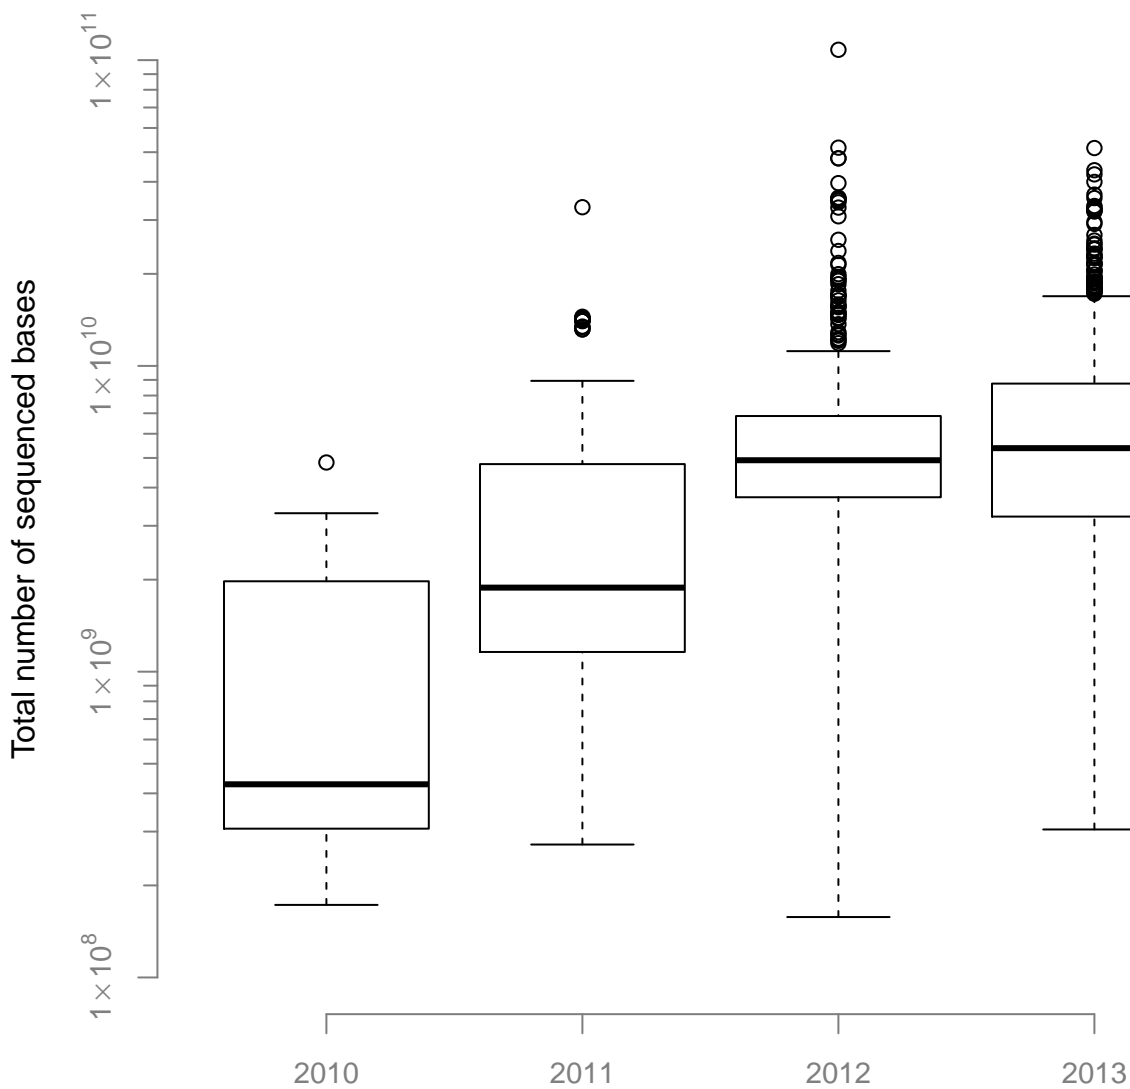

Supplement: 13073_2015_152_MOESM7_ESM.pdf [file 13073_2015_152_MOESM7_ESM.pdf]
