# Supplementary material for: Calling genotypes from public RNA-sequencing data enables identification of genetic variants that affect gene-expression levels
Source: PubMed Central journal article supplement (PMC4423486; doi:10.1186/s13073-015-0152-4), 2015-03-27

a

## Brain specific eQTL genes

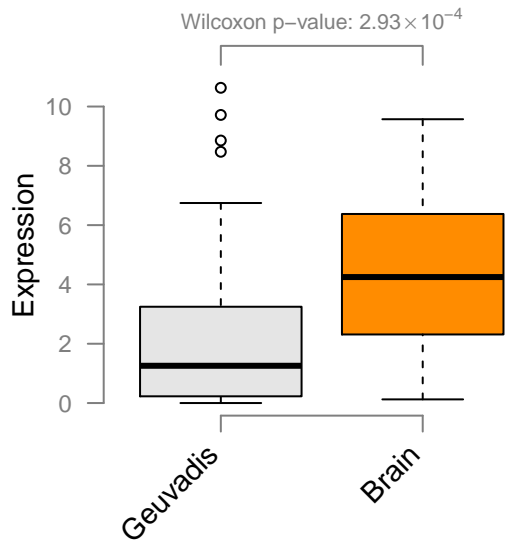

b

## Liver specific eQTL genes

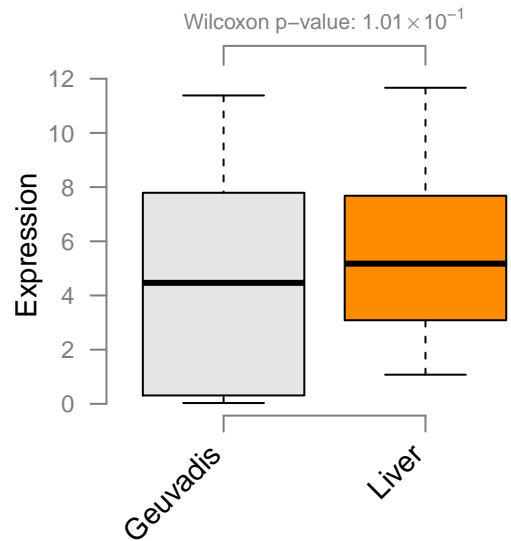

c

## Bladder specific eQTL genes

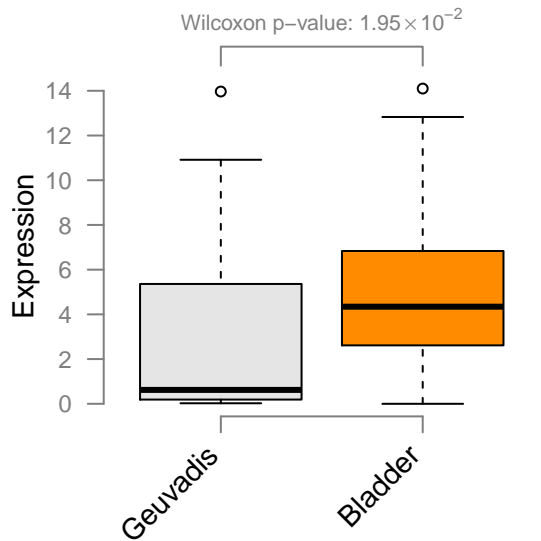

d

## Breast specific eQTL genes

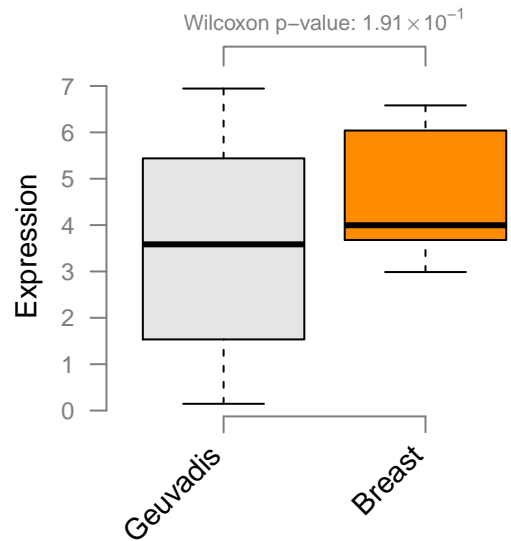

Supplement: 13073_2015_152_MOESM10_ESM.pdf [file 13073_2015_152_MOESM10_ESM.pdf]
